## Title: Genome-wide Analysis of Insomnia (N=1,331,010) Identifies Novel Loci and Functional Pathways

Philip R. Jansen<sup>1,2</sup>, Kyoko Watanabe<sup>1</sup>, Sven Stringer<sup>1</sup>, Nathan Skene<sup>3</sup>, Julien Bryois<sup>4</sup>,  
Anke R. Hammerschlag<sup>1</sup>, Christiaan A. de Leeuw<sup>1</sup>, Jeroen Benjamins<sup>5</sup>,  
Ana B. Muñoz-Manchado<sup>3</sup>, Mats Nagel<sup>1,6</sup>, Jeanne E. Savage<sup>1</sup>, Henning Tiemeier<sup>2,7</sup>,  
Tonya White<sup>2</sup>, The 23andMe Research Team<sup>8</sup>, Joyce Y. Tung<sup>8</sup>, David A. Hinds<sup>8</sup>,  
Vladimir Vacic<sup>8</sup>, Patrick F. Sullivan<sup>4,9,10</sup>, Sophie van der Sluis<sup>1,6</sup>, Tinca J.C. Polderman<sup>1</sup>,  
August B. Smit<sup>11</sup>, Jens Hjerling-Leffler<sup>3</sup>, Eus J.W. Van Someren<sup>12,13\*</sup>, Danielle Posthuma<sup>1,6\*†</sup>

### Affiliations:

- <sup>1</sup> Department of Complex Trait Genetics, Center for Neurogenomics and Cognitive Research, Amsterdam Neuroscience, VU University Amsterdam, The Netherlands
- <sup>2</sup> Department of Child and Adolescent Psychiatry, Erasmus University Medical Center, Rotterdam, the Netherlands
- <sup>3</sup> Laboratory of Molecular Neurobiology, Department of Medical Biochemistry and Biophysics, Karolinska Institutet, Stockholm, Sweden
- <sup>4</sup> Department of Medical Epidemiology and Biostatistics, Karolinska Institutet, Stockholm, Sweden
- <sup>5</sup> Departments of Social, Health and Organizational Psychology, and of Experimental Psychology, Utrecht University, the Netherlands
- <sup>6</sup> Department of Clinical Genetics, Section Complex Trait Genetics, Amsterdam Neuroscience, VU University Medical Center, Amsterdam, the Netherlands
- <sup>7</sup> Department of Psychiatry, Erasmus University Medical Center, Rotterdam, the Netherlands
- <sup>8</sup> 23andMe, Inc., Mountain View, CA, USA
- <sup>9</sup> Department of Genetics, University of North Carolina, Chapel Hill, USA
- <sup>10</sup> Department of Psychiatry, University of North Carolina, Chapel Hill, USA
- <sup>11</sup> Department of Molecular and Cellular Neurobiology, Center for Neurogenomics and Cognitive Research, Amsterdam Neuroscience, VU University Amsterdam, Amsterdam, Netherlands
- <sup>12</sup> Departments of Integrative Neurophysiology and Psychiatry InGeest, Amsterdam Neuroscience, VU University and Medical Center, Amsterdam, The Netherlands
- <sup>13</sup> Department of Sleep and Cognition, Netherlands Institute for Neuroscience, an institute of the Royal Netherlands Academy of Arts and Sciences, Amsterdam, The Netherlands

\* These authors contributed equally to this work

† Correspondence should be addressed to: Danielle Posthuma: Department of Complex Trait Genetics, VU University, De Boelelaan 1085, 1081 HV, Amsterdam, The Netherlands.  
Phone: +31 20 598 2823, Fax: +31 20 5986926, [d.posthuma@vu.nl](mailto:d.posthuma@vu.nl)

**Word count:** abstract:196; main text: 3,747; Methods: 2,097

**Display items:** 5 (Tables 0, Figures 5)

Includes **Supplementary Information, Supplementary Figures 1 and 2** in separate pdf file,  
and **Supplementary Tables 1-28** in separate excel file

1 **Abstract**

2 Insomnia is the second-most prevalent mental disorder, with no sufficient treatment available.  
3 Despite a substantial role of genetic factors, only a handful of genes have been implicated and  
4 insight into the associated neurobiological pathways remains limited. Here, we use an  
5 unprecedented large genetic association sample (N=1,331,010) to allow detection of a  
6 substantial number of genetic variants and gain insight into biological functions, cell types  
7 and tissues involved in insomnia. We identify 202 genome-wide significant loci implicating  
8 956 genes through positional, eQTL and chromatin interaction mapping. We show  
9 involvement of the axonal part of neurons, of specific cortical and subcortical tissues, and of  
10 two specific cell-types in insomnia: striatal medium spiny neurons and hypothalamic neurons.  
11 These cell-types have been implicated previously in the regulation of reward processing,  
12 sleep and arousal in animal studies, but have never been genetically linked to insomnia in  
13 humans. We found weak genetic correlations with other sleep-related traits, but strong  
14 genetic correlations with psychiatric and metabolic traits. Mendelian randomization identified  
15 causal effects of insomnia on specific psychiatric and metabolic traits. Our findings reveal  
16 key brain areas and cells implicated in the neurobiology of insomnia and its related disorders,  
17 and provide novel targets for treatment.

18

19

20

21 Insomnia is the second-most prevalent mental disorder<sup>1</sup>. One third of the general population  
22 reports insomnia complaints. The diagnostic criteria for Insomnia Disorder<sup>2</sup> (i.e. difficulties  
23 with initiating or maintaining sleep with accompanying daytime complaints at least three  
24 times a week for at least three months, which cannot be attributed to inadequate  
25 circumstances for sleep<sup>3</sup>) are met by 10%, up to one third in samples of older age<sup>4</sup>. Insomnia  
26 contributes significantly to the risk and severity of cardiovascular, metabolic, mood, and  
27 neurodegenerative disorders<sup>2</sup>. Despite evidence of a considerable genetic component  
28 (heritability 38-59%<sup>5</sup>), only a small number of genetic loci moderating the risk of insomnia  
29 have thus far been identified<sup>6,7</sup>. Recent genome-wide association studies<sup>6,7</sup> (GWAS) for  
30 insomnia complaints (N=113,006) demonstrated its polygenic architecture and implicated  
31 three genome-wide significant (GWS) loci and seven genes. A prominent role was reported  
32 for *MEIS1*, which showed pleiotropic effects for insomnia complaints and restless legs  
33 syndrome (RLS)<sup>7</sup>, yet the role of other genes was not unambiguously shown. We set out to  
34 substantially increase the sample size to allow the detection of more genetic risk variants for  
35 insomnia complaints, which may aid in understanding its neurobiological mechanisms. By  
36 combining data collected in the UK Biobank v2<sup>8</sup> (UKB; N=386,533) and 23andMe, Inc., a  
37 personal genetics company<sup>9,10</sup> (N=944,477), we obtained an unprecedented sample size of  
38 1,331,010 individuals. Insomnia complaints were measured using questionnaire data, and the  
39 specific questions were validated to be good proxies of insomnia disorder, using an  
40 independent sample (The Netherlands Sleep Register, NSR)<sup>11</sup> in which we had access to  
41 similar question data, as well as clinical interviews assessing insomnia disorder (see  
42 **Supplementary Methods 1.1-1.3**). We find 202 risk loci for insomnia complaints, and  
43 extensive functional in silico analyses reveal the involvement of specific tissue and cell types,  
44 whereas secondary statistical analyses reveal causal effects of insomnia on metabolic and  
45 psychiatric traits.



46 **Meta-analysis yields 202 risk loci**

47 UKB assessed insomnia complaints (hereafter referred to as ‘insomnia’) using a touchscreen  
48 device while 23andMe research participants completed online surveys. Assessment of  
49 insomnia in both samples shows high accuracy (sensitivity=84-98%; specificity=80-96%) for  
50 Insomnia Disorder (see **Supplementary Methods 1.3**). The prevalence of insomnia in the  
51 UKBv2 sample was 28.3%, 30.5% in the 23andMe sample, and 29.3% in the combined  
52 sample, in keeping with previous estimates for people with advanced age in the UK<sup>4</sup> and  
53 elsewhere<sup>12,13</sup>. Older people dominate the UKB sample (mean age=56.7, SD=8.0) and the  
54 23andMe sample (two-thirds of the sample older than 45, one-third even older than 60 years  
55 of age). Prevalence was higher in females (34.6%) than males (24.5%), yielding an odds ratio  
56 (OR) of 1.6, close to the OR of 1.4 reported in a meta-analysis<sup>14</sup>.

57 Quality control was conducted separately per sample, following standardized, stringent  
58 protocols (see **Methods**). GWAS was run separately per sample (UKB; N=386,533,  
59 23andMe, Inc.; N=944,477) (**Extended Data Fig. 1**), and then meta-analyzed using  
60 METAL<sup>15</sup> by weighing SNP effects by sample size (see **Methods**). We first analyzed males  
61 and females separately (**Extended Data Fig. 2, 3**), and observed a high genetic correlation  
62 between the sexes ( $r_g=0.92$ , SE=0.02, **Extended Data Table 1**), indicating strong overlap of  
63 genetic effects. Owing to the large sample size, the  $r_g$  of 0.92 was significantly different from  
64 1 (one-sided Wald test,  $P=2.54\times 10^{-6}$ ) suggesting a small role for sex-specific genetic risk  
65 factors, consistent with our previous report<sup>7</sup>. However, since sex-specific effects were  
66 relatively small, we here focus on identifying genetic effects important in both sexes and  
67 continued with the combined sample (**Supplementary Table 1, 2** and **Supplementary**  
68 **Discussion 2.1** provide sex-specific results).

69 We observe significant polygenic signal in the GWAS (lambda inflation factor=1.808) which  
70 could not be ascribed to spurious association (LD Score intercept=1.075)<sup>16</sup> (**Extended Data**

71 **Fig. 4a**). Meta-analysis identified 11,990 genome-wide significant (GWS) SNPs ( $P < 5 \times 10^{-8}$ ),  
72 represented by 248 independent lead SNPs ( $r^2 < 0.1$ ), located in 202 genomic risk loci (**Fig.**  
73 **1a**, **Supplementary Fig. 1** and **Supplementary Table 3, 4**). All lead SNPs showed  
74 concordant signs of effect in both samples (**Extended Data Fig. 4b**). We confirm two  
75 (chr2:66,785,180 and chr5:135,393,752) out of six previously reported loci for insomnia <sup>6,7</sup>  
76 (**Supplementary Table 5**). Polygenic score (PGS) prediction in three randomly selected  
77 hold-out samples (N=3×3,000) estimated the current results to explain up to 2.6% of the  
78 variance in insomnia (**Fig. 1b**, **Extended Data Fig. 5** and **Supplementary Table 6**).

79 The SNP-based heritability ( $h^2_{SNP}$ ) was estimated at 7.0% (SE=0.002). Partitioning the  
80 heritability by functional categories of SNPs (see **Methods**) showed the strongest enrichment  
81 of  $h^2_{SNP}$  in conserved regions (enrichment=15.8,  $P=1.57 \times 10^{-14}$ ). In addition,  $h^2_{SNP}$  was  
82 enriched in common SNPs (MAF > 0.3) and depleted in more rare SNPs (MAF < 0.01; **Fig. 1c**  
83 and **Supplementary Table 7**).

84 We used FUMA<sup>17</sup> to functionally annotate all 22,068 SNPs in the risk loci that were in LD  
85 ( $r^2 \geq 0.6$ ) with one of the independent significant SNPs (see **Methods**). The majority of these  
86 SNPs (76.8%) were in open chromatin regions<sup>18</sup> as indicated by a minimum chromatin state  
87 of 1-7 (**Fig. 1d** and **Supplementary Table 8**). In line with findings for other traits<sup>7,19</sup>, about  
88 half of these SNPs were in intergenic (35.5%) or non-coding RNA (13.0%) regions (**Fig. 1e**),  
89 and of these, 0.72% were highly likely to have a regulatory function as indicated by a  
90 RegulomeDB Score < 2 (see **Methods**). However, of these 51.5% were located inside a  
91 protein coding gene and 0.81% were exonic. Of the 177 exonic SNPs, 71 were exonic non-  
92 synonymous (ExNS, **Supplementary Table 9**). *WDR90* included four ExNS (rs7190775,  
93 rs4984906, rs3752493, and rs3803697) all in high LD with the same independent significant  
94 SNP (rs3184470). There were two ExNS SNPs with extremely high Combined Annotation  
95 Dependent Depletion (CADD) scores<sup>20</sup> suggesting a strong deleterious effect on protein

96 function: rs13107325 in *SLC39A8* (locus 56,  $P=8.31\times 10^{-16}$ ) with the derived allele T  
97 (MAF=0.03) associated with an increased risk of insomnia, and rs35713889 in *LAMB2* (locus  
98 42,  $P=1.77\times 10^{-7}$ ), where the derived allele T of rs35713889 (MAF=0.11) was also associated  
99 with an increased risk of insomnia complaints. **Supplementary Table 10** and  
100 **Supplementary Discussion 2.2** provide a detailed overview of the functional impact of all  
101 variants in the genomic risk loci.

102

### 103 **Genes implicated in insomnia**

104 To obtain insight into (functional) consequences of individual GWS SNPs we used FUMA<sup>17</sup>  
105 to apply three strategies to map associated variants to genes (see **Methods**). Positional gene-  
106 mapping aligned SNPs to 412 genes by location. Expression Quantitative Trait Loci (eQTL)  
107 gene-mapping matched cis-eQTL SNPs to 594 genes whose expression levels they influence.  
108 Chromatin interaction mapping annotated SNPs to 159 genes based on three-dimensional  
109 DNA-DNA interactions between genomic regions of the GWS SNPs and nearby or distant  
110 genes (**Supplementary Fig. 2, Supplementary Table 11** and **Supplementary Discussion**  
111 **2.3**). 91 genes were mapped by all three strategies (**Supplementary Table 12**) and 336 genes  
112 were physically located outside of the risk loci but were implicated by eQTL associations  
113 (306 genes), chromatin interactions (16 genes) or both (14 genes). Several genes were  
114 implicated by GWS SNPs originating from two distinct risk loci on the same chromosome  
115 (**Fig. 2a** and **2b**): *MEIS1*, located on chromosome 2 in the strongest associated locus (locus  
116 20), was positionally mapped by 51 SNPs and mapped by chromatin interactions in 10 tissue  
117 types including cross-loci interactions from locus 21, and is a known gene involved in  
118 insomnia<sup>7</sup>. *LRGUK*, located on chromosome 7 in locus 106, was positionally mapped by 22  
119 SNPs and chromatin interactions in 3 tissue types including cross-loci interactions from locus  
120 105. *LRGUK* was also implicated by eQTLs associations of 125 SNPs in 14 general tissue

121 types. *LRGUK* was previously implicated in type 2 diabetes<sup>21</sup> and autism spectrum disorder<sup>22</sup>  
122 - disorders with prominent insomnia - but not yet directly implicated in sleep-related  
123 phenotypes, and is the most likely candidate to explain the observed association in loci 105  
124 and 106.

125 Apart from linking individual associated genetic variants to genes, we conducted a genome-  
126 wide gene-based association analysis (GWGAS) using MAGMA<sup>23</sup>. GWGAS provides  
127 aggregate association *P*-values based on all variants located in a gene, and complements the  
128 three FUMA mapping strategies (see **Methods**). GWGAS identified 517 associated genes  
129 (**Fig. 2c** and **Supplementary Table 13**). The top gene *BTBD9* ( $P=8.51\times 10^{-23}$ ) on  
130 chromosome 6 in locus 81 was also mapped by positional and eQTL mapping (tissue type:  
131 left ventricle of the heart), and is part of a pathway regulating circadian rhythms. *BTBD9* has  
132 been associated with RLS, periodic limb movement disorder<sup>24,25</sup> and Tourette Syndrome<sup>26</sup>.  
133 Involvement in sleep regulation was shown in *Drosophila*<sup>27</sup>, and mouse mutants show  
134 fragmented sleep<sup>28</sup> and increased levels of dynamin 1<sup>29</sup>, a protein that mediates the increased  
135 sleep onset latency following pre-sleep arousal<sup>30</sup>.

136 Of the 517 MAGMA-based associated genes, 222 were outside of the GWAS risk loci, and  
137 309 were also mapped by FUMA. In total, 956 unique genes were mapped by at least one of  
138 the three FUMA gene mapping strategies or by MAGMA (**Extended Data Fig. 6**). Of these,  
139 *MEIS1*, *MED27*, *IPO7* and *ACBD4* confirmed previous results<sup>6,7</sup> (**Supplementary Table 14**).

140 Sixty-two genes were implicated by all four mapping strategies indicating that apart from a  
141 GWS gene-based *P*-value, there were (i) GWS SNPs located inside these genes, (ii) GWS  
142 SNPs associated with differential expression of these genes and (iii) GWS SNPs that were  
143 involved in genomic regions interacting with these genes. We note that genes that were  
144 indicated by positional mapping and GWS gene-based *P*-values, but not via eQTL or  
145 chromatin interaction mapping (N=54 genes), may be of equal importance, yet are more

146 likely to exert their influence on insomnia via structural changes in the gene products (i.e. at  
147 the protein level) and not via quantitative changes in the availability of the gene products.

148

#### 149 **Implicated pathways, tissues and cell-types**

150 To test whether GWS genes converged in functional gene-sets and pathways, we conducted  
151 gene-set analyses using MAGMA (see **Methods**). We tested associations of 7,473 gene-sets:  
152 7,246 sets derived from the MsigDB<sup>31</sup>, gene expression values from 54 tissues from the  
153 GTEx database<sup>32</sup>, and cell-specific gene expression in 173 types of brain cells (**Fig. 2d**,  
154 **Supplementary Table 15**). Competitive testing was used and a Bonferroni corrected  
155 threshold of  $P < 6.7 \times 10^{-6}$  ( $0.05/7,473$ ) to correct for multiple testing. Of the MsigDB gene-  
156 sets, three Gene Ontology (GO) gene-sets survived multiple testing: GO:*locomotory behavior*  
157 ( $P = 8.95 \times 10^{-7}$ ), GO:*behavior* ( $P = 5.23 \times 10^{-6}$ ), and GO:*axon part* ( $P = 4.25 \times 10^{-6}$ ). Twelve genes  
158 (*LRRK2*, *CRH*, *DLG4*, *DNMI*, *DRD1*, *DRD2*, *DRD4*, *GRIN1*, *NTSRI*, *SNCA*, *CNTN2*, and  
159 *CALBI*) were included in all of these gene-sets and two of these (*SNCA*, *DNMI*) had a GWS  
160 gene-based *P*-value (**Supplementary Table 16**). *SNCA* encodes alpha-synuclein and has  
161 been implicated in REM sleep behavior disorder<sup>33</sup> and Parkinson's disease<sup>34</sup>. Altered  
162 expression in mice changes sleep and wake EEG spectra<sup>35</sup> along the same dimensions that  
163 have been implicated in insomnia disorder<sup>36</sup>. *DNMI* encodes the synaptic neuronal protein  
164 dynamin 1, which is increased in *BTBD9* mutant mice<sup>29</sup> and mediates the sleep-disruptive  
165 effect of pre-sleep arousal (see above; *BTBD9* is the top associated gene). Conditional gene-  
166 set analyses suggested that the association with the gene-set *behavior* is almost completely  
167 explained by the association of *locomotory behavior*, and that the effect of *axon part* is  
168 independent of this (**Supplementary Discussion 2.4**). GO:*locomotory behavior* includes 175  
169 genes involved in stimulus-evoked movement<sup>37</sup>. This set included 16 GWS genes: *BTBD9*,  
170 *MEIS1*, *DABI*, *SNCA*, *GNAO1*, *ATP2B2*, *NEGR1*, *SLC4A10*, *GIP*, *DNMI*, *GPRC5B*, *GRM5*,

171 *NRG1*, *PARK2*, *TALI*, and *OXR1*). GO:*axon part* reflects a very general cellular component  
172 representing 219 genes, of which 14 were GWS (*KIF3B*, *SNCA*, *GRIA1*, *CDH8*, *ROBO2*,  
173 *DNMI1*, *RANGAP1*, *GABBR1*, *P2RX3*, *NRG1*, *POLG*, *DAG1*, *NFASC*, and *CALB2*).

174 Tissue specific gene-set analyses showed strong enrichment of genetic signal in genes  
175 expressed in the brain. Correcting for overall expression, four specific brain tissues reached  
176 the threshold for significance: overall cerebral cortex ( $P=3.68\times 10^{-6}$ ), Brodmann area 9 (BA9)  
177 of frontal cortex ( $P=5.04\times 10^{-7}$ ), BA24 of the anterior cingulate cortex ( $P=3.25\times 10^{-6}$ ), and  
178 cerebellar hemisphere ( $P=5.93\times 10^{-6}$ )<sup>1</sup>. Several other brain tissues also showed strong  
179 enrichment just below threshold, including three striatal basal ganglia (BG) structures  
180 (nucleus accumbens, caudate nucleus, putamen). To test whether genes expressed in all three  
181 BG structures together would show significant enrichment of low *P*-values, we used the first  
182 principal component (BG<sub>PC</sub>) of these BG structures and found significant enrichment  
183 ( $P=8.33\times 10^{-8}$ ). When conditioning the three top cortical structures on the BG<sub>PC</sub>, they were no  
184 longer significantly associated after multiple testing correction (minimum  $P=0.03$ ), which  
185 was expected given that the BG<sub>PC</sub> correlated strongly with gene-expression in cortical (and  
186 other) areas ( $r>0.96$ ). Similar results were obtained vice versa, i.e. using the first principal  
187 component of all cortical areas and conditioning the three BG structures on this resulted in no  
188 evidence of enrichment of low *P*-values for BG structures (minimum  $P=0.53$ ). These results  
189 show that (i) genes expressed in brain are important in insomnia, (ii) genes expressed in  
190 cortical areas are more strongly associated than genes expressed in BG, (iii) there is a strong  
191 correlation between gene expression patterns across brain tissues, which suggests  
192 involvement of general cellular signatures more than specific brain tissue structures.

---

<sup>1</sup> We caution that only a limited set of brain tissues were included and thus we cannot rule out associations with many important areas such as pons, midbrain or thalamus based on this analysis.

193 Brain cell type-specific gene-set analyses was first carried out on 24 broad cell-type  
194 categories. Cell type-specific gene expression was quantified using single cell RNA-  
195 sequencing of dissociated cells from somatosensory cortex, hippocampus, hypothalamus,  
196 striatum and midbrain from mouse (see **Methods**), which closely resembles gene-expression  
197 in humans<sup>38</sup>. Results indicated that genes expressed specifically in the medium spiny neurons  
198 (MSN,  $P=4.83\times 10^{-7}$ ) were associated with insomnia, and no other broad cell-types specific  
199 gene-set survived our strict threshold of  $P<6.7\times 10^{-6}$ . MSNs represent 95% of neurons within  
200 the human striatum, which is one of the four major nuclei of the subcortical BG. Specifically,  
201 the striatum consists of the ventral (nucleus accumbens and olfactory tubercle) and dorsal  
202 (caudate nucleus and putamen) subdivisions. The association with MSNs thus likely explains  
203 the observed association of the BG striatal structures (nucleus accumbens, caudate nucleus,  
204 putamen).

205 Using broad cell classes risks not detecting associations that are specific to distinctive yet rare  
206 cell types; to account for this we then tested 149 specific brain cell-type categories, and found  
207 significant associations with 7 specific cell types: medio-lateral neuroblasts type 3, 4 and 5  
208 ( $P=2.36\times 10^{-6}$ ,  $P=1.88\times 10^{-6}$ , and  $P=1.87\times 10^{-6}$ ), D2 type medium spiny neurons ( $P=2.12\times 10^{-6}$ ),  
209 claustrum pyramidal neurons ( $P=3.09\times 10^{-6}$ ), hypothalamic Vglut2 Morn4 Prrc2a neurons  
210 ( $P=4.36\times 10^{-6}$ ), and hypothalamic Vglut2 Hcn16430411 K18 Rik neurons ( $P=4.98\times 10^{-6}$ ),  
211 known to have the densest number of melatonin receptors. These results suggest a role of  
212 distinct mature and developing cell types in the midbrain and hypothalamus. The  
213 hypothalamus contains multiple nuclei that are key to the control of sleep and arousal,  
214 including the suprachiasmatic nucleus (SCN) that accommodates the biological clock of the  
215 brain<sup>39</sup>.

216

217

## 218 **Low genetic overlap with sleep traits**

219 Other sleep-related traits may easily be confounded with specific symptoms of insomnia, like  
220 early morning awakening, difficulties maintaining sleep, and daytime sleepiness. The most  
221 recent genome-wide studies for other sleep-related traits included 59,128 to 128,266  
222 individuals, and assessed genetic effects on morningness<sup>6,40,41</sup> (i.e. being a morning person),  
223 sleep duration<sup>6,41</sup>, and daytime sleepiness/dozing<sup>41</sup>. Using increased sample sizes for each of  
224 these sleep-related traits (max N=434,835), we here investigated to what extent insomnia and  
225 other sleep-related traits are genetically distinct or overlapping. We performed GWAS  
226 analyses for the following six sleep-related traits: morningness, sleep duration, ease of getting  
227 up in the morning, naps during the day, daytime dozing, and snoring (**Supplementary**  
228 **Methods 1.1-1.2, Extended Data Fig. 7, 9**). Of the 202 risk loci for insomnia, 39 were also  
229 GWS in at least one of the other sleep-related traits (**Fig. 3, Supplementary Table 17**). The  
230 strongest overlap in loci was found with sleep duration, with 14 out of 49 sleep duration loci  
231 overlapping with insomnia. Insomnia showed the highest genetic correlation with sleep  
232 duration ( $-0.47$ ,  $SE=0.02$ ; **Supplementary Table 18**) compared to other sleep-related traits,  
233 which was not surprising given that insomnia also shared the most risk loci with sleep  
234 duration (See further discussion sleep phenotypes in **Supplementary Discussion 2.5**).

235 Gene-mapping of SNP associations of sleep-related traits resulted in 973 unique genes  
236 (**Extended Data Fig. 9, Supplementary Table 19-23**). Gene-based analysis showed that of  
237 the 517 GWS genes for insomnia, 120 were GWS in at least one of the other sleep-related  
238 traits, and one gene (*RBFox1*) was GWS in all except napping and dozing (**Supplementary**  
239 **Table 24**). The largest proportion of overlap in GWS genes for insomnia was again with  
240 sleep duration, with 37 of the 135 (27%) GWS genes for sleep duration also GWS for  
241 insomnia. There was overlap in tissue enrichment in cortical structures and basal ganglia  
242 between insomnia and both morningness and sleep duration. On the single cell level, the



243 medium spiny neurons were also implicated for morningness and sleep duration, but not for  
244 the other sleep-related traits (**Supplementary Table 25**). Taken together, these results  
245 suggest that at a genetic level, insomnia shows partial overlap with sleep duration, but  
246 minimal overlap with other sleep-related traits. Consistent short sleep across nights occurs  
247 only in a minor part of insomnia patients, even in a clinical sample<sup>42</sup>.

248

#### 249 **Strong overlap between insomnia and psychiatric and metabolic traits**

250 We confirm previously reported genetic correlations between insomnia and neuropsychiatric  
251 and metabolic traits<sup>6,7</sup> (**Supplementary Table 26**), and also identify several GWS SNPs for  
252 insomnia that have previously been associated with these traits (**Supplementary Table 27**).

253 The strongest correlations were with depressive symptoms ( $r_g=0.64$ ,  $SE=0.04$   $P=1.21\times 10^{-71}$ ),  
254 followed by anxiety disorder ( $r_g=0.56$ ,  $SE=0.11$   $P=1.40\times 10^{-7}$ ), subjective well-being  
255 ( $r_g=-0.51$ ,  $SE=0.03$   $P=4.93\times 10^{-52}$ ), major depression ( $r_g=0.50$ ,  $SE=0.07$   $P=8.08\times 10^{-12}$ ) and

256 neuroticism ( $r_g=0.48$ ,  $SE=0.02$   $P=8.72\times 10^{-80}$ ). Genetic correlations with metabolic traits  
257 ranged between 0.09-0.20. The genetic correlations between insomnia and psychiatric traits  
258 were also stronger than the correlations between insomnia and the other sleep-related traits.

259 Since a similar high reliability has been reported for both sleep and psychiatric phenotypes,  
260 the findings suggest that genetically insomnia more closely resembles neuropsychiatric traits  
261 than it resembles other sleep-related traits (**Fig. 4**). To infer directional associations between

262 insomnia and these correlated traits, we performed bidirectional Multi-SNP Mendelian  
263 Randomization (MR) analysis<sup>43</sup> (see **Methods**). Results support a direct risk effect of  
264 insomnia on metabolic syndrome phenotypes including BMI ( $b_{xy}=0.36$ ,  $SE=0.05$ ,

265  $P=1.25\times 10^{-12}$ ) type 2 diabetes ( $b_{xy}=0.62$ ,  $SE=0.11$ ,  $P=2.29\times 10^{-8}$ ), and coronary artery disease  
266 ( $b_{xy}=0.61$ ,  $SE=0.09$ ,  $P=2.88\times 10^{-12}$ ). In addition, insomnia was bidirectionally associated with

267 educational attainment, with a stronger effect from insomnia on educational attainment

268 ( $b_{xy}=-0.32$ ,  $SE=0.02$ ,  $P=1.68\times 10^{-77}$ ) (i.e. a higher risk for insomnia leads to lower  
269 educational attainment) than vice versa ( $b_{xy}=-0.10$ ,  $SE=0.01$ ,  $P=2.27\times 10^{-23}$ ), the same pattern  
270 was observed for intelligence. We also found risk effects of insomnia on several psychiatric  
271 traits, including schizophrenia ( $b_{xy}=0.68$ ,  $SE=0.10$ ,  $P=5.12\times 10^{-11}$ ), ADHD ( $b_{xy}=0.77$ ,  
272  $SE=0.06$ ,  $P=2.50\times 10^{-45}$ ), neuroticism ( $b_{xy}=0.46$ ,  $SE=0.03$ ,  $P=3.92\times 10^{-53}$ ) and anxiety disorder  
273 ( $b_{xy}=0.47$ ,  $SE=0.10$ ,  $P=4.11\times 10^{-6}$ ), with no evidence of large reverse effects, except for a  
274 small risk effect of neuroticism on insomnia ( $b_{xy}=0.09$ ,  $SE=0.02$ ,  $P=1.24\times 10^{-6}$ ) and  
275 depressive symptoms ( $b_{xy}=0.09$ ,  $SE=0.02$ ,  $P=1.24\times 10^{-6}$ )<sup>2</sup>. Overall, there was only a small  
276 proportion of SNPs showing pleiotropy between insomnia and other traits (**Supplementary**  
277 **Table 28** and **Supplementary Discussion 2.6**).

278

## 279 Discussion

280 In the largest GWAS study to date of 1,331,010 participants we identified 202 genomic risk  
281 loci for insomnia. Using extensive functional annotation of associated genetic variants, we  
282 demonstrated that the genetic component of insomnia points towards a role of genes involved  
283 in locomotory behavior, and genes expressed in specific cell types from the claustrum,  
284 hypothalamus and striatum, and specifically in MSNs (**Fig. 5**). MSNs are GABAergic  
285 inhibitory cells and represent 95% of neurons in the human striatum, one of the four major  
286 nuclei of the BG (for reviews, see <sup>44-46</sup>). MSNs receive massive excitatory glutamatergic  
287 input from the cerebral cortex and the thalamus, and are targets of dopamine neurons in  
288 substantia nigra and the ventral tegmental area. In addition, they receive inhibitory inputs  
289 from striatal GABAergic interneurons. MSNs themselves are GABAergic output neurons  
290 with exceptionally long projections to globus pallidus (GP), substantia nigra and ventral

---

<sup>2</sup> We do note that for major depression the reverse MR could not be carried out due to an insufficient number of SNPs with a low  $P$ -value

291 pallidum, and control the activity of thalamocortical neurons. Previous studies during the  
292 natural sleep-wake cycle, *in vitro*, and from anesthetized *in vivo* preparations have shown that  
293 MSNs show fast, synchronized cyclic firing, i.e. the so-called Up and Down states, during  
294 slow-wave sleep and irregular pattern of action potentials during wakefulness. In fact, MSNs  
295 were the first neurons in which the Up and Down states characteristic of slow wave sleep  
296 were described<sup>47</sup>. Cell body-specific striatal lesions of the rostral striatum induce a profound  
297 sleep fragmentation, which is most characteristic of insomnia. A role for BG in sleep  
298 regulation is also suggested by the high prevalence of insomnia in neurodegenerative  
299 disorders, such as Parkinson's Disease and Huntington's disease in which the BG are  
300 affected. Vetrivelan et al.<sup>44</sup> proposes a cortex-striatum-GP<sub>external</sub>-cortex network involved in  
301 the control of sleep-wake behavior and cortical activation, in which midbrain dopamine  
302 disinhibits the GP<sub>external</sub> and promotes sleep through activation of D2 receptors in this  
303 network. Furthermore, brain imaging studies have suggested the caudate nucleus of the  
304 striatum as a key node in the neuronal network imbalance of insomnia<sup>48</sup>, and also reported  
305 abnormal function in the cortical areas we found to be most enriched (BA9<sup>49</sup>, BA24<sup>50</sup>). Our  
306 results support the involvement of the striato-cortical network in insomnia, by showing  
307 enrichment of risk genes for insomnia in cortical areas as well as the striatum, and  
308 specifically in MSNs. We recently showed that, along with several other cell types, MSNs  
309 also mediate the risk for mood disorders<sup>51</sup> and schizophrenia<sup>38</sup>. MSNs are strongly implicated  
310 in reward processing and future work could address whether the genetic overlap between  
311 insomnia and mood disorders is mediated by gene function in MSNs.

312 Our results also showed enrichment of insomnia genes in pyramidal neurons of the claustrum.  
313 This subcortical brain region is structurally closely associated with the amygdala and has  
314 been implicated in salience coding of incoming stimuli and binding of multisensory  
315 information into conscious percepts<sup>52</sup>. These functions are highly relevant to insomnia,

316 because the disorder is characterized by increased processing of incoming stimuli<sup>53</sup> and by  
317 ongoing consciousness even during sleep, a phenomenon known as sleep state  
318 misperception<sup>54</sup>. We also found enrichment of insomnia genes in mediolateral neuroblasts  
319 from the embryonic midbrain and in two hypothalamic cell types. The role of the  
320 mediolateral neuroblasts is less clear; although they were obtained from the embryonic  
321 midbrain, it is at present unknown what type of mature neurons they differentiate into. We  
322 note that the midbrain is similar on a bulk transcriptomic level to the pons<sup>55</sup>, and lacking cells  
323 from that region we cannot conclusively say that midbrain cell-types are enriched.

324 The current findings provide novel insight into the causal mechanism of insomnia,  
325 implicating specific cell types, brain areas and biological functions. These findings are  
326 starting points for the development of new therapeutic targets for insomnia and may also  
327 provide valuable insights for other, genetically related disorders.

328 **Methods:**

329 **Meta-analysis**

330 A meta-analysis on the GWAS results of insomnia and morningness in UKB and 23andMe  
331 cohorts was performed using fixed-effects meta-analysis METAL<sup>15</sup>, using SNP *P*-values  
332 weighted by sample size. To investigate sex-specific genetic effects, we ran the meta-analysis  
333 between UKB and 23andMe datasets for males and females separately.

334

335 **Genomic risk loci definition**

336 We used FUMA<sup>17</sup> (<http://fuma.ctglab.nl/>), an online platform for functional mapping and  
337 annotation of genetic variants, to define genomic risk loci and obtain functional information  
338 of relevant SNPs in these loci. FUMA provides comprehensive annotation information by  
339 combining several external data sources. We first identified *independent significant SNPs* that  
340 have a genome-wide significant *P*-value ( $<5 \times 10^{-8}$ ) and are independent from each other at  
341  $r^2 < 0.6$ . These SNPs were further represented by *lead SNPs*, which are a subset of the  
342 independent significant SNPs that are in approximate linkage equilibrium with each other at  
343  $r^2 < 0.1$ . We then defined associated *genomic risk loci* by merging any physically overlapping  
344 lead SNPs (linkage disequilibrium [LD] blocks  $< 250$ kb apart). Borders of the genomic risk  
345 loci were defined by identifying all SNPs in LD ( $r^2 \geq 0.6$ ) with one of the independent  
346 significant SNPs in the locus, and the region containing all these *candidate SNPs* was  
347 considered to be a single independent genomic risk locus. LD information was calculated  
348 using the UK Biobank genotype data as a reference. Risk loci were defined based on  
349 evidence from independent significant SNPs that were available in both 23andMe and UKB.  
350 We note that SNPs that were GWS but only available in the 23andMe dataset were not  
351 included when defining genomic risk loci and were not included in any follow-up annotations  
352 or analyses, because there was no external replication in the UKB sample. If such SNPs were

353 located in a risk locus, they are displayed in Locuszoom plots (grey, as there is no LD  
354 information in UKB). When risk loci contained GWS SNPs based solely on 23andMe, we did  
355 not count that risk locus, as there were no other SNPs available in both samples that  
356 supported these GWS SNPs.

357

### 358 **Gene-based analysis**

359 SNP-based *P*-values from the meta-analysis were used as input for the gene-based genome-  
360 wide association analysis (GWGAS). 18,182 to 18,185 protein-coding genes (each containing  
361 at least one SNP in the GWAS, the total number of tested genes can thus be slightly different  
362 across phenotypes) from the NCBI 37.3 gene definitions were used as basis for GWGAS in  
363 MAGMA<sup>23</sup>. Bonferroni correction was applied to correct for multiple testing ( $P < 2.73 \times 10^{-6}$ ).

364

### 365 **Gene-set analysis**

366 Results from the GWGAS analyses were used to test for association in three types of 7,473  
367 predefined gene-sets:

- 368 1. 7,246 curated gene-sets representing known biological and metabolic pathways  
369 derived from 9 data resources, catalogued by and obtained from the MsigDB version  
370 6.0<sup>56</sup> (<http://software.broadinstitute.org/gsea/msigdb/collections.jsp>)
- 371 2. Gene expression values from 54 (53 + 1 calculated 1<sup>st</sup> PC of three tissue subtypes)  
372 tissues obtained from GTEx<sup>32</sup>, log<sub>2</sub> transformed with pseudocount 1 after  
373 winsorization at 50 and averaged per tissue
- 374 3. Cell-type specific expression in 173 types of brain cells (24 broad categories of cell  
375 types, 'level 1' and 129 specific categories of cell types 'level 2'), which were  
376 calculated following the method described in<sup>38</sup>. Briefly, brain cell-type expression  
377 data was drawn from single-cell RNA sequencing data from mouse brains. For each

378 gene, the value for each cell-type was calculated by dividing the mean Unique  
379 Molecular Identifier (UMI) counts for the given cell type by the summed mean UMI  
380 counts across all cell types. Single-cell gene-sets were derived by grouping genes into  
381 40 equal bins based on specificity of expression. Mouse cell gene-expression was  
382 shown to closely approximate gene-expression in post-mortem human tissue<sup>38</sup>.

383 These gene-sets were tested using MAGMA. We computed competitive *P*-values, which  
384 represent the test of association for a specific gene-set compared with genes not in the gene-  
385 set to correct for baseline level of genetic association in the data<sup>57</sup>. The Bonferroni-corrected  
386 significance threshold was  $0.05/7,473 \text{ gene-sets}=6.7 \times 10^{-6}$ . Conditional analyses were  
387 performed as a follow-up using MAGMA to test whether each significant association  
388 observed was independent of all others. The association between each gene-set in each of the  
389 three categories was tested conditional on the most strongly associated set, and then, if any  
390 substantial ( $P < 0.05/\text{number of gene-sets}$ ) associations remained, by conditioning on the first  
391 and second most strongly associated set, and so on until no associations remained. Gene-sets  
392 that retained their association after correcting for other sets were considered to represent  
393 independent signals. We note that this is not a test of association per se, but rather a strategy  
394 to identify, among gene-sets with known significant associations and overlap in genes, which  
395 set (s) are responsible for driving the observed association.

396

### 397 **SNP-based heritability and genetic correlation**

398 LD Score regression<sup>16</sup> was used to estimate genomic inflation and SNP-based heritability of  
399 the phenotypes, and to estimate the cross-cohort genetic correlations. Pre-calculated LD  
400 scores from the 1000 Genomes European reference population were obtained from  
401 <https://data.broadinstitute.org/alkesgroup/LDSCORE/>.

402

### 403 **Genetic correlations**

404 Genetic correlations between sleep-related traits, and between sleep-related traits and  
405 previously published GWAS studies of sufficient sample size were calculated using LD Score  
406 regression on HapMap3 SNPs only. Genetic correlations were corrected for multiple testing  
407 based on the total number of correlations (between 6 sleep-related phenotypes and 27  
408 previous GWAS studies) by applying a Bonferroni corrected threshold of  
409 ( $P < 0.05/33 = 1.51 \times 10^{-3}$ ).

410

### 411 **Stratified heritability**

412 To test whether specific categories of SNP annotations were enriched for heritability, we  
413 partitioned SNP heritability for binary annotations using stratified LD score regression<sup>58</sup>.  
414 Heritability enrichment was calculated as the proportion of heritability explained by a SNP  
415 category divided by the proportion of SNPs that are in that category. Partitioned heritability  
416 was computed by 28 functional annotation categories, by minor allele frequency (MAF) in  
417 six percentile bins and by 22 chromosomes. Annotations for binary categories of functional  
418 genomic characteristics (e.g. coding or regulatory regions) were obtained from the LD score  
419 website (<https://github.com/bulik/ldsc>). The Bonferroni-corrected significance threshold for  
420 56 annotations was set at:  $P < 0.05/56 = 8.93 \times 10^{-4}$ .

421

### 422 **Functional annotation of SNPs**

423 Functional annotation of SNPs implicated in the meta-analysis was performed using  
424 FUMA<sup>17</sup>. We selected all candidate SNPs in genomic risk loci having an  $r^2 \geq 0.6$  with one of  
425 the independent significant SNPs (see above), a  $P$ -value ( $P < 1 \times 10^{-5}$ ), a  $MAF > 0.0001$  for  
426 annotations, and availability in both UKB and 23andMe datasets. Functional consequences



427 for these SNPs were obtained by matching SNPs' chromosome, base-pair position, and  
428 reference and alternate alleles to databases containing known functional annotations,  
429 including ANNOVAR<sup>59</sup> categories, Combined Annotation Dependent Depletion (CADD)  
430 scores, RegulomeDB<sup>20</sup> (RDB) scores, and chromatin states<sup>60</sup>. ANNOVAR categories identify  
431 the SNP's genic position (e.g. intron, exon, intergenic) and associated function. CADD scores  
432 predict how deleterious the effect of a SNP is likely to be for a protein structure/function,  
433 with higher scores referring to higher deleteriousness. A CADD score above 12.37 is  
434 considered to be potentially pathogenic<sup>20</sup>. The RegulomeDB score is a categorical score  
435 based on information from expression quantitative trait loci (eQTLs) and chromatin marks,  
436 ranging from 1a to 7 with lower scores indicating an increased likelihood of having a  
437 regulatory function. Scores are as follows: 1a=eQTL + Transcription Factor (TF) binding +  
438 matched TF motif + matched DNase Footprint + DNase peak; 1b=eQTL + TF binding + any  
439 motif + DNase Footprint + DNase peak; 1c=eQTL + TF binding + matched TF motif +  
440 DNase peak; 1d=eQTL + TF binding + any motif + DNase peak; 1e=eQTL + TF binding +  
441 matched TF motif; 1f=eQTL + TF binding / DNase peak; 2a=TF binding + matched TF motif  
442 + matched DNase Footprint + DNase peak; 2b=TF binding + any motif + DNase Footprint +  
443 DNase peak; 2c=TF binding + matched TF motif + DNase peak; 3a=TF binding + any motif  
444 + DNase peak; 3b=TF binding + matched TF motif; 4=TF binding + DNase peak; 5=TF  
445 binding or DNase peak; 6=other;7=Not available. The chromatin state represents the  
446 accessibility of genomic regions (every 200bp) with 15 categorical states predicted by a  
447 hidden Markov model based on 5 chromatin marks for 127 epigenomes in the Roadmap  
448 Epigenomics Project<sup>61</sup>. A lower state indicates higher accessibility, with states 1-7 referring  
449 to open chromatin states. We annotated the minimum chromatin state across tissues to SNPs.  
450 The 15-core chromatin states as suggested by Roadmap are as follows: 1=Active  
451 Transcription Start Site (TSS); 2=Flanking Active TSS; 3=Transcription at gene 5' and 3';

452 4=Strong transcription; 5= Weak Transcription; 6=Genic enhancers; 7=Enhancers; 8=Zinc  
453 finger genes & repeats; 9=Heterochromatic; 10=Bivalent/Poised TSS; 11=Flanking  
454 Bivalent/Poised TSS/Enh; 12=Bivalent Enhancer; 13=Repressed PolyComb; 14=Weak  
455 Repressed PolyComb; 15=Quiescent/Low.

456

### 457 **Gene-mapping**

458 Genome-wide significant loci obtained by GWAS were mapped to genes in FUMA<sup>17</sup> using  
459 three strategies:

460 1. Positional mapping maps SNPs to genes based on physical distance (within a 10kb  
461 window) from known protein coding genes in the human reference assembly  
462 (GRCh37/hg19).

463 2. eQTL mapping maps SNPs to genes with which they show a significant eQTL association  
464 (i.e. allelic variation at the SNP is associated with the expression level of that gene). eQTL  
465 mapping uses information from 45 tissue types in 3 data repositories (GTEx<sup>32</sup>, Blood eQTL  
466 browser<sup>60</sup>, BIOS QTL browser<sup>62</sup>), and is based on cis-eQTLs which can map SNPs to genes  
467 up to 1Mb apart. We used a false discovery rate (FDR) of 0.05 to define significant eQTL  
468 associations.

469 3. Chromatin interaction mapping was performed to map SNPs to genes when there is a  
470 three-dimensional DNA-DNA interaction between the SNP region and another gene region.  
471 Chromatin interaction mapping can involve long-range interactions as it does not have a  
472 distance boundary. FUMA currently contains Hi-C data of 14 tissue types from the study of  
473 Schmitt et al<sup>63</sup>. Since chromatin interactions are often defined in a certain resolution, such as  
474 40kb, an interacting region can span multiple genes. If a SNP is located in a region that  
475 interacts with a region containing multiple genes, it will be mapped to each of those genes.  
476 To further prioritize candidate genes, we selected only interaction-mapped genes in which

477 one region involved in the interaction overlaps with a predicted enhancer region in any of the  
478 111 tissue/cell types from the Roadmap Epigenomics Project<sup>61</sup>, and the other region is  
479 located in a gene promoter region (250bp up and 500bp downstream of the transcription start  
480 site and also predicted by Roadmap to be a promoter region). This method reduces the  
481 number of genes mapped but increases the likelihood that those identified will indeed have a  
482 plausible biological function. We used a  $P\text{-FDR} < 1 \times 10^{-5}$  to define significant interactions,  
483 based on previous recommendations<sup>63</sup>, modified to account for the differences in cell lines  
484 used here.

485

#### 486 **GWAS catalog lookup**

487 We used FUMA to identify SNPs with previously reported ( $P < 5 \times 10^{-5}$ ) phenotypic  
488 associations in published GWAS listed in the NHGRI-EBI catalog<sup>64</sup>, which matched with  
489 SNPs in LD with one of the independent significant SNPs identified in the meta-analysis.

490

#### 491 **Polygenic risk scoring**

492 To calculate the explained variance in insomnia by our GWAS results, we calculated  
493 polygenic scores (PGS) based on the SNP effect sizes in the meta-analysis. The PGS were  
494 calculated using two methods: LDpred<sup>65</sup> and PRSice<sup>66</sup>, a script for calculating  $P$ -value  
495 thresholded PGS in PLINK. PGS were calculated using a leave-one-out method, where  
496 summary statistics were recalculated each time with one sample of  $N=3,000$  from UKB  
497 excluded from the analysis. This sample was then used as a target sample for estimating the  
498 explained variance in insomnia by the PGS.

499

#### 500 **Mendelian Randomization**

501 To investigate causal associations between insomnia and genetically correlated traits, we  
502 analyzed direction of effects using Generalized Summary-data based Mendelian  
503 Randomization (GSMR<sup>43</sup>; <http://cnsgenomics.com/software/gsmr/>). This method uses effect  
504 sizes from GWAS summary statistics (standardized betas or log-transformed odds ratios) to  
505 infer causality of effects between two traits based on genome-wide significant SNPs. Built-in  
506 HEIDI outlier detection was applied to remove SNPs with pleiotropic effects on both traits,  
507 as these may bias the results. We tested for causal associations between insomnia and traits  
508 that were significantly genetically correlated with insomnia ( $b_{zx}$ ). In addition, we tested for  
509 bi-directional associations by using other traits as the determinant and insomnia as the  
510 outcome ( $b_{zy}$ ). We selected independent ( $r^2 < 0.1$ ) lead SNPs with a GWS  $P$ -value ( $< 5 \times 10^{-8}$ ) as  
511 instrumental variables in the analyses. For traits with less than 10 lead SNPs (i.e. the  
512 minimum number of SNPs on which GSMR can perform a reliable analysis) we selected  
513 independent SNPs ( $r^2 < 0.1$ ), with a  $P$ -value  $< 1 \times 10^{-5}$ . If the outcome trait is binary, the  
514 estimated  $b_{zx}$  and  $b_{zy}$  are approximately equal to the natural log of the odds ratio (OR). An OR  
515 of 2 can be interpreted as a doubled risk compared to the population prevalence of a binary  
516 trait for every SD increase in the exposure trait. For quantitative traits, the  $b_{zx}$  and  $b_{zy}$  can be  
517 interpreted as a one standard deviation increase explained in the outcome trait for every SD  
518 increase in the exposure trait.

519

520 **References:**

521

- 522 1. Wittchen, H.-U. *et al.* The size and burden of mental disorders and other disorders of  
523 the brain in europe 2010. *Eur. Neuropsychopharmacol.* **21**, 655-679 (2011).
- 524 2. Morin, C.M. *et al.* Insomnia disorder. *Nat. Rev. Dis. Primers* **1**, 15026-15026 (2015).
- 525 3. Association', A.P. *Diagnostic and statistical manual of mental disorders (dsm-5®)*,  
526 (American Psychiatric Pub, 2013).
- 527 4. Morphy, H., Dunn, K.M., Lewis, M., Boardman, H.F. & Croft, P.R. Epidemiology of  
528 insomnia: A longitudinal study in a uk population. *Sleep* **30**, 274-280 (2007).
- 529 5. Lind, M.J., Aggen, S.H., Kirkpatrick, R.M., Kendler, K.S. & Amstadter, A.B. A  
530 longitudinal twin study of insomnia symptoms in adults. *Sleep* **38**, 1423-1430 (2015).
- 531 6. Lane, J.M. *et al.* Genome-wide association analysis identifies novel loci for  
532 chronotype in 100,420 individuals from the uk biobank. *Nat. Comm.* **7**, 10889 (2016).
- 533 7. Hammerschlag, A. *et al.* Genome-wide association analysis of insomnia identifies  
534 novel risk genes and genetic overlap with psychiatric and metabolic traits. *Nat. Genet.*  
535 **49**, 1584 (2017).
- 536 8. Sudlow, C. *et al.* Uk biobank: An open access resource for identifying the causes of a  
537 wide range of complex diseases of middle and old age. *PLoS Medicine* **12**, e1001779  
538 (2015).
- 539 9. Eriksson, N. *et al.* Web-based, participant-driven studies yield novel genetic  
540 associations for common traits. *PLoS Genetics* **6**, e1000993 (2010).
- 541 10. Tung, J.Y. *et al.* Efficient replication of over 180 genetic associations with self-  
542 reported medical data. *PLoS One* **6**, e23473 (2011).
- 543 11. Benjamins, J.S. *et al.* Insomnia heterogeneity: Characteristics to consider for data-  
544 driven multivariate subtyping. *Sleep Med. Rev.* **36**, 71-81 (2017).
- 545 12. Paparrigopoulos, T. *et al.* Insomnia and its correlates in a representative sample of the  
546 greek population. *BMC Public Health* **10**, 531 (2010).
- 547 13. Cho, Y.W. *et al.* Epidemiology of insomnia in korean adults: Prevalence and  
548 associated factors. *Jour. Clin. Neurology* **5**, 20-23 (2009).
- 549 14. Zhang, B. & Wing, Y.-K. Sex differences in insomnia: A meta-analysis. *Sleep* **29**, 85-  
550 93 (2006).
- 551 15. Willer, C.J., Li, Y. & Abecasis, G.R. Metal: Fast and efficient meta-analysis of  
552 genomewide association scans. *Bioinformatics* **26**, 2190-2191 (2010).
- 553 16. Bulik-Sullivan, B.K. *et al.* Ld score regression distinguishes confounding from  
554 polygenicity in genome-wide association studies. *Nat. Genet.* **47**, 291-295 (2015).
- 555 17. Watanabe, K., Taskesen, E., Bochoven, A. & Posthuma, D. Functional mapping and  
556 annotation of genetic associations with fuma. *Nat. Comm.* **8**, 1826 (2017).
- 557 18. Ernst, J. & Kellis, M. Chromhmm: Automating chromatin-state discovery and  
558 characterization. *Nat. Methods* **9**, 215-216 (2012).
- 559 19. Sniekers, S. *et al.* Genome-wide association meta-analysis of 78,308 individuals  
560 identifies new loci and genes influencing human intelligence. *Nat. Genet.* **49**, 1107-  
561 1112 (2017).
- 562 20. Kircher, M. *et al.* A general framework for estimating the relative pathogenicity of  
563 human genetic variants. *Nat. Genet.* **46**, 310-315 (2014).
- 564 21. Laramie, J.M. *et al.* Polymorphisms near exoc4 and Irguk on chromosome 7q32 are  
565 associated with type 2 diabetes and fasting glucose; the nhlbi family heart study. *BMC*  
566 *Med. Genet.* **9**, 46 (2008).
- 567 22. Butler, M.G., Rafi, S.K. & Manzardo, A.M. High-resolution chromosome ideogram  
568 representation of currently recognized genes for autism spectrum disorders. *Int. J.*  
569 *Mol. Sci.* **16**, 6464-6495 (2015).

- 570 23. de Leeuw, C.A., Mooij, J.M., Heskes, T. & Posthuma, D. Magma: Generalized gene-  
571 set analysis of gwas data. *PLoS Computational Biology* **11**, e1004219 (2015).
- 572 24. Kripke, D.F. *et al.* Genetic variants associated with sleep disorders. *Sleep Med.* **16**,  
573 217-224 (2015).
- 574 25. Stefansson, H. *et al.* A genetic risk factor for periodic limb movements in sleep. *N.*  
575 *Engl. J. Med.* **357**, 639-647 (2007).
- 576 26. Janik, P., Berdyński, M., Safranow, K. & Żekanowski, C. The *btbd9* gene  
577 polymorphisms in polish patients with gilles de la tourette syndrome. *Acta Neurobiol.*  
578 *Exp. (Wars.)* **74**, 218-226 (2014).
- 579 27. Freeman, A. *et al.* Sleep fragmentation and motor restlessness in a drosophila model  
580 of restless legs syndrome. *Curr. Biol.* **22**, 1142-1148 (2012).
- 581 28. DeAndrade, M.P. *et al.* Motor restlessness, sleep disturbances, thermal sensory  
582 alterations and elevated serum iron levels in *btbd9* mutant mice. *Hum. Mol. Genet.* **21**,  
583 3984-3992 (2012).
- 584 29. DeAndrade, M.P. *et al.* Enhanced hippocampal long-term potentiation and fear  
585 memory in *btbd9* mutant mice. *PLoS One* **7**, e35518 (2012).
- 586 30. Suzuki, A., Sinton, C.M., Greene, R.W. & Yanagisawa, M. Behavioral and  
587 biochemical dissociation of arousal and homeostatic sleep need influenced by prior  
588 wakeful experience in mice. *Proceedings of the National Academy of Sciences* **110**,  
589 10288-10293 (2013).
- 590 31. Liberzon, A. *et al.* The molecular signatures database hallmark gene set collection.  
591 *Cell systems* **1**, 417-425 (2015).
- 592 32. Consortium, G.T. The genotype-tissue expression (gtex) pilot analysis: Multitissue  
593 gene regulation in humans. *Science* **348**, 648-660 (2015).
- 594 33. Toffoli, M. *et al.* *SncA* 3' utr genetic variants in patients with parkinson's disease and  
595 rem sleep behavior disorder. *Neurol. Sci.* **38**, 1233-1240 (2017).
- 596 34. Edwards, T.L. *et al.* Genome-wide association study confirms snps in *sncA* and the  
597 *mapt* region as common risk factors for parkinson disease. *Ann. Hum. Genet.* **74**, 97-  
598 109 (2010).
- 599 35. McDowell, K.A., Shin, D., Roos, K.P. & Chesselet, M.-F. Sleep dysfunction and eeg  
600 alterations in mice overexpressing alpha-synuclein. *J. Parkinsons Dis.* **4**, 531-539  
601 (2014).
- 602 36. Colombo, M.A. *et al.* Wake high-density electroencephalographic spatio-spectral  
603 signatures of insomnia. *Sleep* **39**, 1015-1027 (2016).
- 604 37. Gene Ontology, C. The gene ontology (go) database and informatics resource. *Nucleic*  
605 *Acids Res.* **32**, D258-D261 (2004).
- 606 38. Skene, N.G. *et al.* Genetic identification of brain cell types underlying schizophrenia.  
607 *bioRxiv*, 145466 (2017).
- 608 39. Saper, C.B., Scammell, T.E. & Lu, J. Hypothalamic regulation of sleep and circadian  
609 rhythms. *Nature* **437**, 1257-1263 (2005).
- 610 40. Hu, Y. *et al.* Gwas of 89,283 individuals identifies genetic variants associated with  
611 self-reporting of being a morning person. *Nat. Comm.* **7**, 10448 (2016).
- 612 41. Jones, S.E. *et al.* Genome-wide association analyses in 128,266 individuals identifies  
613 new morningness and sleep duration loci. *PLoS Genetics* **12**, e1006125 (2016).
- 614 42. Johann, A.F. *et al.* Insomnia with objective short sleep duration is associated with  
615 longer duration of insomnia in the freiburg insomnia cohort compared to insomnia  
616 with normal sleep duration, but not with hypertension. *PLoS One* **12**, e0180339  
617 (2017).
- 618 43. Zhu, Z. *et al.* Causal associations between risk factors and common diseases inferred  
619 from gwas summary data. *Nat. Comm.* **9**, 224 (2018).



- 620 44. Vettrivelan, R., Qiu, M.-H., Chang, C. & Lu, J. Role of basal ganglia in sleep–wake  
621 regulation: Neural circuitry and clinical significance. *Front. Neuroanat.* **4**(2010).
- 622 45. Lazarus, M., Huang, Z.-L., Lu, J., Urade, Y. & Chen, J.-F. How do the basal ganglia  
623 regulate sleep–wake behavior? *Trends Neurosci.* **35**, 723-732 (2012).
- 624 46. Swardfager, W., Rosenblat, J.D., Benlamri, M. & McIntyre, R.S. Mapping  
625 inflammation onto mood: Inflammatory mediators of anhedonia. *Neurosci. Biobehav.*  
626 *Rev.* **64**, 148-166 (2016).
- 627 47. Wilson, C.J. & Groves, P.M. Spontaneous firing patterns of identified spiny neurons  
628 in the rat neostriatum. *Brain Res.* **220**, 67-80 (1981).
- 629 48. Stoffers, D. *et al.* The caudate: A key node in the neuronal network imbalance of  
630 insomnia? *Brain* **137**, 610-620 (2013).
- 631 49. Altena, E. *et al.* Prefrontal hypoactivation and recovery in insomnia. *Sleep* **31**, 1271-  
632 1276 (2008).
- 633 50. Dai, X.-J. *et al.* Altered intrinsic regional brain spontaneous activity and subjective  
634 sleep quality in patients with chronic primary insomnia: A resting-state fmri study.  
635 *Neuropsychiatr. Dis. Treat.* **10**, 2163 (2014).
- 636 51. Nagel, M. *et al.* Gwas meta-analysis of neuroticism (n= 449,484) identifies novel  
637 genetic loci and pathways. *bioRxiv*, 184820 (2017).
- 638 52. Mathur, B.N. The claustrum in review. *Front. Syst. Neurosci.* **8**, 48 (2014).
- 639 53. Wei, Y. *et al.* I keep a close watch on this heart of mine: Increased interoception in  
640 insomnia. *Sleep* **39**, 2113-2124 (2016).
- 641 54. Krystal, A.D., Edinger, J.D., Wohlgemuth, W.K. & Marsh, G.R. Nrem sleep eeg  
642 frequency spectral correlates of sleep complaints in primary insomnia subtypes. *Sleep*  
643 **25**, 630-40 (2002).
- 644 55. Hawrylycz, M. *et al.* Canonical genetic signatures of the adult human brain. *Nat.*  
645 *Neurosci.* **18**, 1832-1844 (2015).
- 646 56. Liberzon, A. *et al.* Molecular signatures database (msigdb) 3.0. *Bioinformatics* **27**,  
647 1739-1740 (2011).
- 648 57. de Leeuw, C.A., Neale, B.M., Heskes, T. & Posthuma, D. The statistical properties of  
649 gene-set analysis. *Nature Reviews Genetics* **17**, 353-364 (2016).
- 650 58. Finucane, H.K. *et al.* Partitioning heritability by functional annotation using genome-  
651 wide association summary statistics. *Nat. Genet.* **47**, 1228-1235 (2015).
- 652 59. Wang, K., Li, M. & Hakonarson, H. Annovar: Functional annotation of genetic  
653 variants from high-throughput sequencing data. *Nucleic Acids Res.* **38**, e164-e164  
654 (2010).
- 655 60. Westra, H.J. *et al.* Systematic identification of trans-eqtls as putative drivers of known  
656 disease associations. *Nat. Genet.* **45**, 1238 (2013).
- 657 61. Kundaje, A. *et al.* Integrative analysis of 111 reference human epigenomes. *Nature*  
658 **518**, 317 (2015).
- 659 62. Zhemakova, D.V. *et al.* Identification of context-dependent expression quantitative  
660 trait loci in whole blood. *Nat. Genet.* **49**, 139-145 (2017).
- 661 63. Schmitt, A.D. *et al.* A compendium of chromatin contact maps reveals spatially active  
662 regions in the human genome. *Cell Reports* **17**, 2042-2059 (2016).
- 663 64. MacArthur, J. *et al.* The new nhgri-ebi catalog of published genome-wide association  
664 studies (gwas catalog). *Nucleic Acids Res.* **45**, D896-D901 (2017).
- 665 65. Vilhjalmsón, B.J. *et al.* Modeling linkage disequilibrium increases accuracy of  
666 polygenic risk scores. *Am. J. Hum. Genet.* **97**, 576-592 (2015).
- 667 66. Euesden, J., Lewis, C.M. & O'Reilly, P.F. Prsice: Polygenic risk score software.  
668 *Bioinformatics* **31**, 1466-1468 (2015).
- 669

670 **Acknowledgements:** This work was funded by The Netherlands Organization for Scientific  
671 Research (NWO Brain & Cognition 433-09-228, NWO MagW VIDI 452-12-04, NWO VICI  
672 435-14-005 and 453-07-001, 645-000-003). P.R.J. was funded by the Sophia Foundation for  
673 Scientific Research (S14-27), E.J.W.V.S. was funded by the European Research Council  
674 (ERC-ADG-2014-671084 INSOMNIA), J.B. was funded by the Swiss National Science  
675 Foundation. Analyses were carried out on the Genetic Cluster Computer, which is financed  
676 by the Netherlands Scientific Organization (NWO: 480-05-003), by the VU University,  
677 Amsterdam, the Netherlands, and by the Dutch Brain Foundation, and is hosted by the Dutch  
678 National Computing and Networking Services SurfSARA. This research has been conducted  
679 using the UK Biobank Resource (application number 16406). We would like to thank the  
680 participants and researchers who collected and contributed to the data. We thank the  
681 23andMe research participants and employees for making this work possible, including the  
682 following members of the 23andMe Research Team: Michelle Agee, Babak Alipanahi, Adam  
683 Auton, Robert K. Bell, Katarzyna Bryc, Sarah L. Elson, Pierre Fontanillas, Nicholas A.  
684 Furlotte, David A. Hinds, Karen E. Huber, Aaron Kleinman, Nadia K. Litterman, Jennifer C.  
685 McCreight, Matthew H. McIntyre, Joanna L. Mountain, Elizabeth S. Noblin, Carrie A. M.  
686 Northover, Steven J. Pitts, J. Fah Sathirapongsasuti, Olga V. Sazonova, Janie F. Shelton,  
687 Suyash Shringarpure, Chao Tian, and Catherine H. Wilson.

688

689 **Author contributions:** D.P. and E.J.W.V.S. conceived the idea of the study. D.P. supervised  
690 the pre- and post gwas analysis pipeline. P.R.J. and K.W. performed the analyses. S.St.  
691 performed quality control on the UK Biobank data and wrote the analysis pipeline. K.W.  
692 wrote the online platform (FUMA) that was used for follow-up analyses. C.d.L conducted  
693 conditional gene-set analyses. J.B., N.S., A.M.M. and J.H.L contributed scRNA information.  
694 J.T., D.H., V.V. and the 23andMe Research Team contributed and analyzed the 23andMe



695 cohort data. D.P., E.J.W.V.S. and P.R.J. wrote the paper. All authors discussed the results,  
696 and approved the final version of the paper.

697

698 **Materials & Correspondence:** The data analyzed in the current study was partly provided  
699 by the UK Biobank Study ([www.ukbiobank.ac.uk](http://www.ukbiobank.ac.uk)), received under the UK Biobank  
700 application number 16406. Our policy is to make genome-wide summary statistics (sumstats)  
701 publicly available. Sumstats from the GWAS's conducted are available for download at  
702 <https://ctg.cncr.nl/>. Note that our freely available meta-analytic sumstats (insomnia and  
703 morningness) concern results excluding the 23andMe sample. This is a non-negotiable clause  
704 in the 23andMe data transfer agreement, intended to protect the privacy of the 23andMe  
705 research participants. To fully recreate our meta-analytic results for insomnia and  
706 morningness: (a) obtain insomnia and morningness sumstats from 23andMe (see below); (b)  
707 conduct a meta-analysis of our sumstats with the 23andMe sumstats. 23andMe participant  
708 data are shared according to community standards that have been developed to protect against  
709 breaches of privacy. Currently, these standards allow for the sharing of summary statistics for  
710 at most 10,000 SNPs. The full set of summary statistics can be made available to qualified  
711 investigators who enter into an agreement with 23andMe that protects participant  
712 confidentiality. Interested investigators should email [dataset-request@23andme.com](mailto:dataset-request@23andme.com) for more  
713 information.

714

715 **Author Information:** V.V., D.H., and J.T. are employees of 23andMe. All other authors  
716 declare no competing financial interest. Correspondence and requests for materials should be  
717 addressed to [d.posthuma@vu.nl](mailto:d.posthuma@vu.nl).

718

719

720 FIGURES  
721

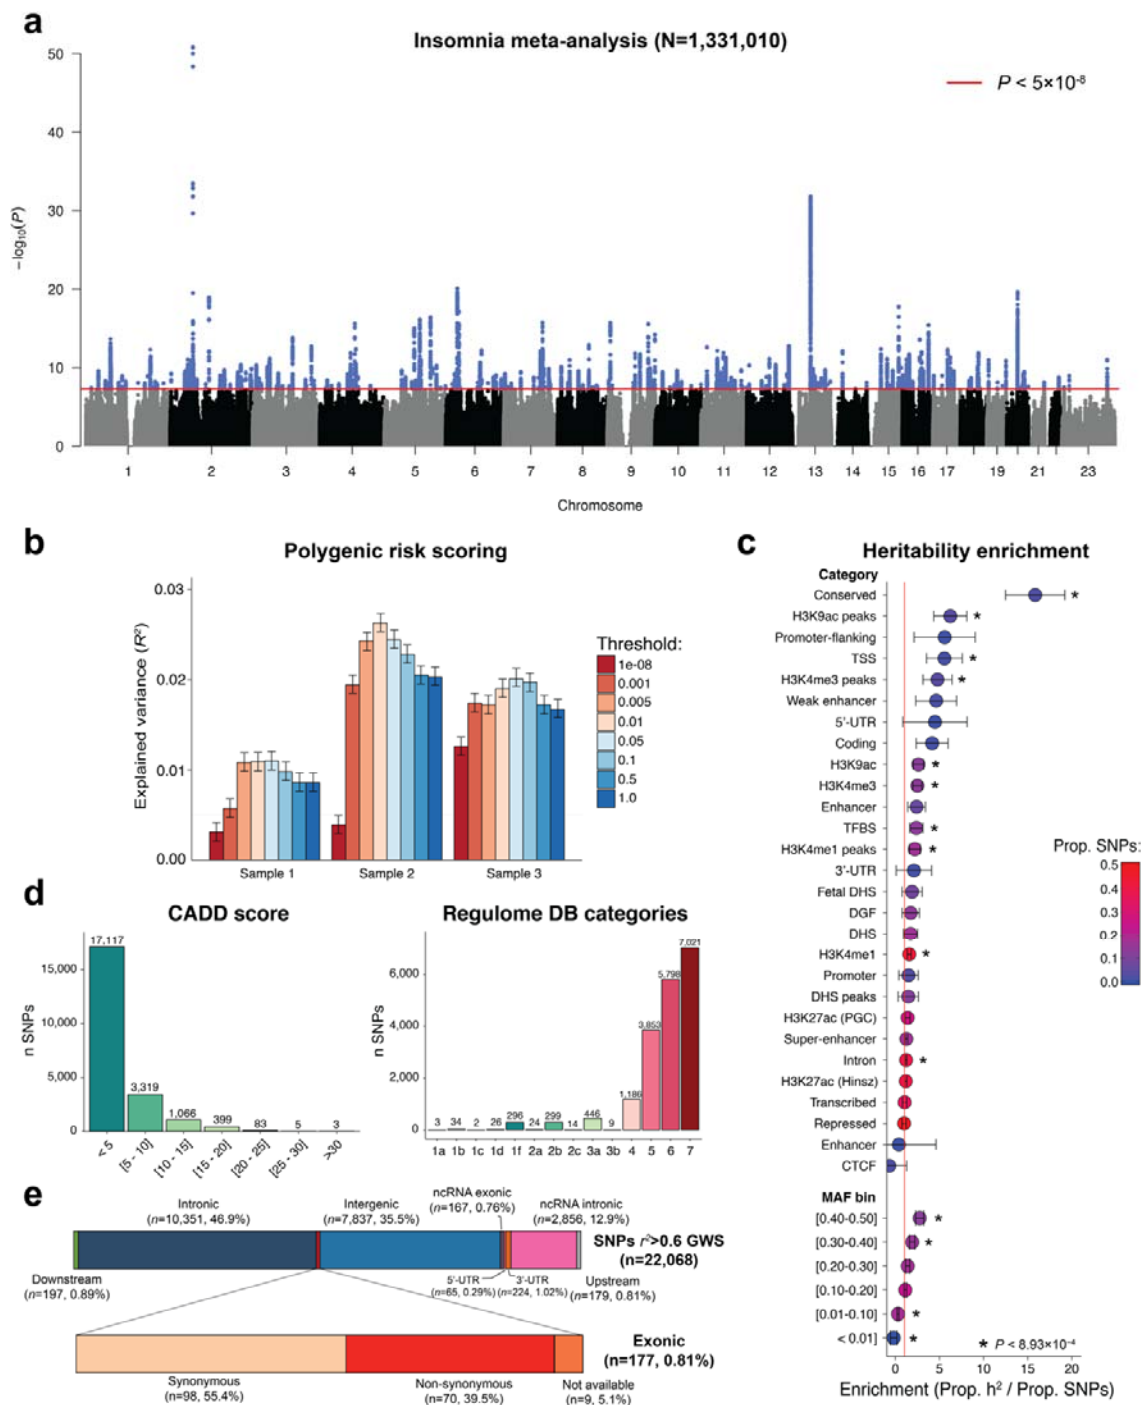

722  
723

724 **Fig. 1a-e. SNP-based results from the GWAS meta-analysis on insomnia (N=1,331,010).** (a)  
725 Manhattan plot of the GWAS of insomnia, showing the  $-\log_{10}$ -transformed  $P$ -value for each SNP (b)  
726 Heritability enrichment for functional SNP categories and minor allele frequency bins (MAF).  
727 Enrichment was calculated by dividing the proportion of heritability for each category by the  
728 proportion of SNPs in that category, significant enrichments after Bonferroni correction (28 functional  
729 categories + 6 MAF bins + 22 chromosomes) are indicated by an asterisk ( $P < 0.05/56 = 8.93 \times 10^{-4}$ ) (c)  
730 Polygenic score (PGS) prediction in three hold-out samples (N=3,000), showing the increase in  
731 explained variance in insomnia (Nagelkerke's pseudo  $R^2$ ) and 95% confidence interval for each  $P$ -  
732 value threshold. All  $P$ -value thresholds were statistically significant. (d) Distribution of CADD scores  
733 and RegulomeDB category of all annotated SNPs in LD ( $r^2 \geq 0.6$ ) with one of the GWS SNPs  
734 ( $n=22,068$ ) and (e) functional consequences of these SNPs.  
735

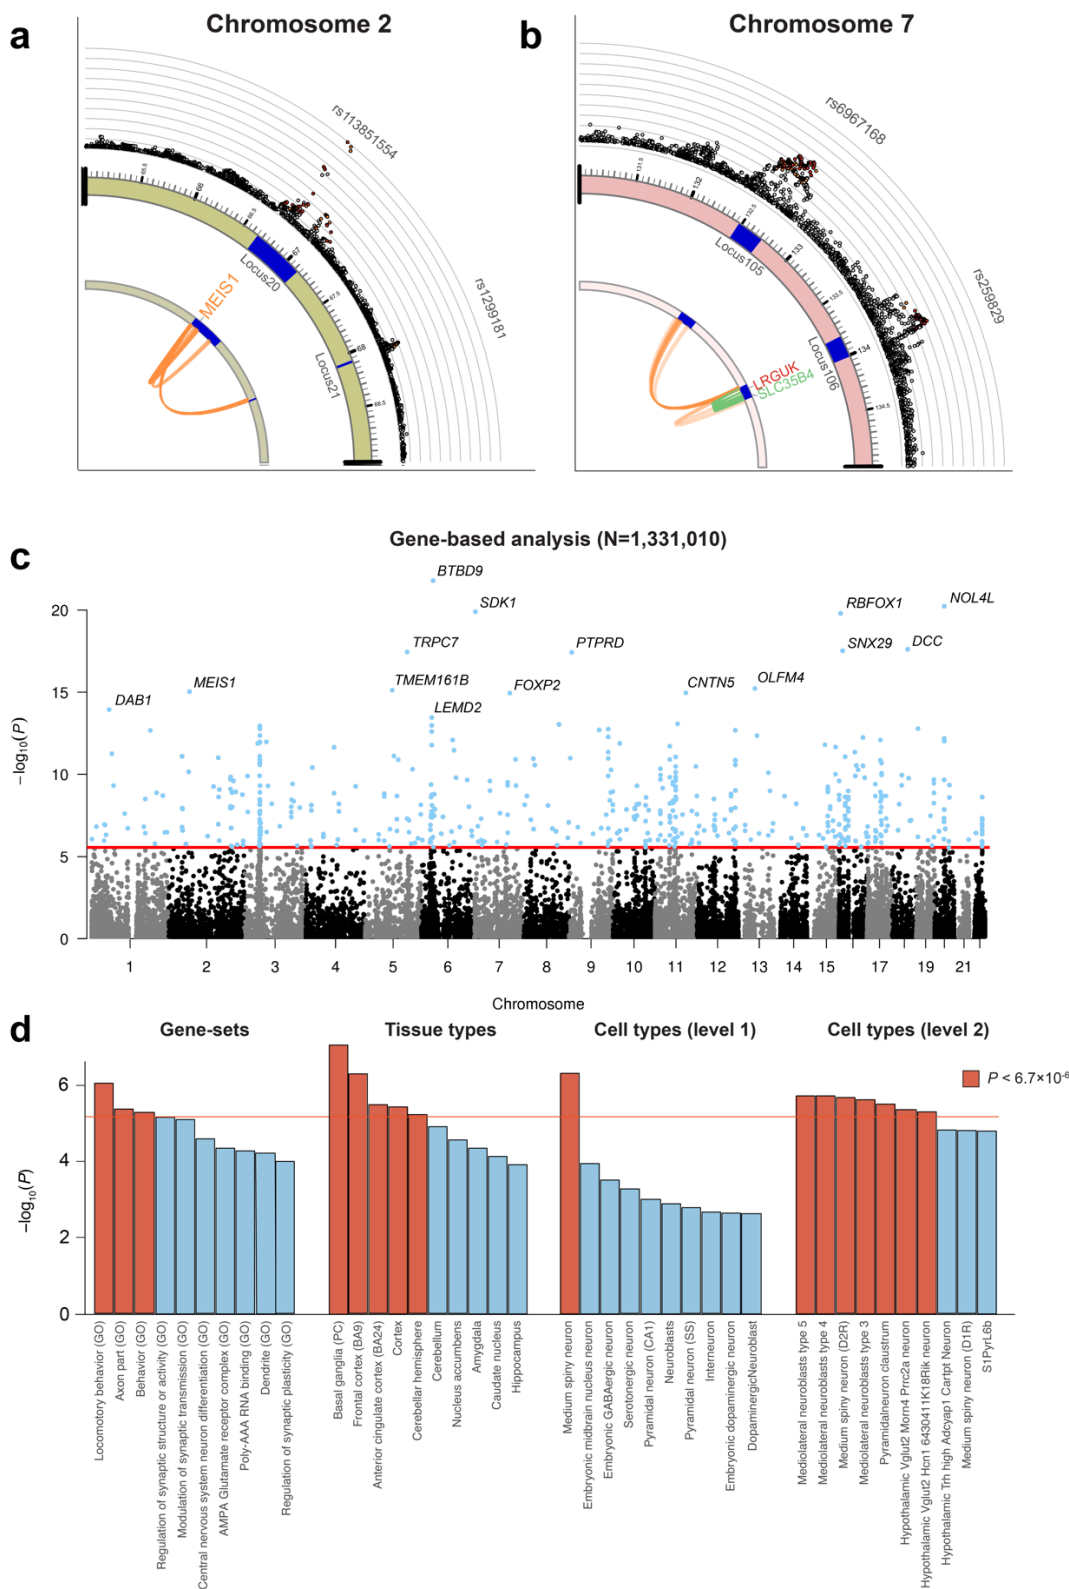

736

737

738 **Fig. 2a-d. Gene-based and gene-set analyses of insomnia.** Zoomed-in circos plots showing genes  
739 implicated by two genomic risk loci on chromosome 2 **(a)** and chromosome 7 **(b)**, genomic risk loci  
740 indicated as blue areas, eQTL associations in green, chromatin interactions in orange. Genes mapped  
741 by both eQTL and chromatin interactions are red. The outer layer shows a Manhattan plot  
742 containing the negative log<sub>10</sub>-transformed *P*-value of each SNP in the GWAS meta-analysis of  
743 insomnia. Full circos plots of all autosomal chromosomes are provided in **Supplementary Fig. 2.** **(c)**  
744 Genome-wide gene-based analysis (GWAS) of 18,185 genes that were tested for association with  
745 insomnia in MAGMA. The y-axis shows the negative log<sub>10</sub>-transformed *P*-value of the gene-based  
746 test, the x-axis shows the starting position on the chromosome. The red line indicates the Bonferroni  
747 corrected threshold for genome-wide significance ( $P=0.05/18,185=2.75\times 10^{-6}$ ). The top 15 most  
748 significant genes are highlighted. **(d)** Gene-set analysis of top 20 for each of the MsigDB pathways,  
749 tissue expression of GTEx tissue types, and cell types from single-cell RNA sequencing. Gene-set  
750 analyses were performed using MAGMA. The red line shows the Bonferroni significance threshold  
751 ( $P<0.05/7,473=6.7\times 10^{-6}$ ), correcting for the total number of tested gene-sets. Red bars indicated  
752 significant gene-sets.

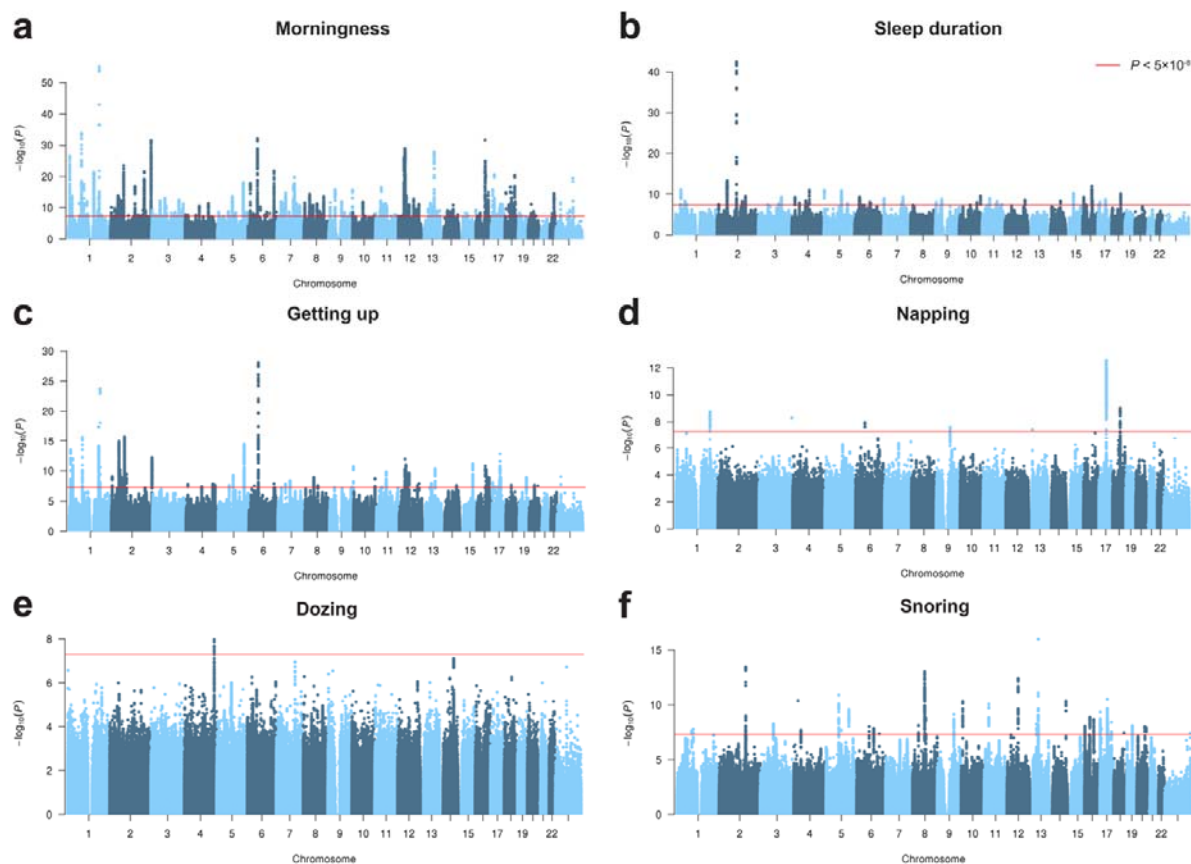

753 **Fig. 3a-f. Genome-wide analyses of six sleep-related traits.** Manhattan plots of the genome-wide  
754 association analyses of (a) Morningness (N=434,835). (b) Sleep duration (N=384,317) (c) Ease of  
755 getting up (N=385,949) (d) Napping (N=386,577) (e) Daytime dozing (N=385,333) and (f) Snoring  
756 (N=359,916). The y-axis shows the negative log<sub>10</sub>-transformed SNP *P*-value, the x-axis the base pair  
757 position of the SNPs on each chromosome. The red line indicates the Bonferroni corrected  
758 significance threshold ( $P < 5 \times 10^{-8}$ ).

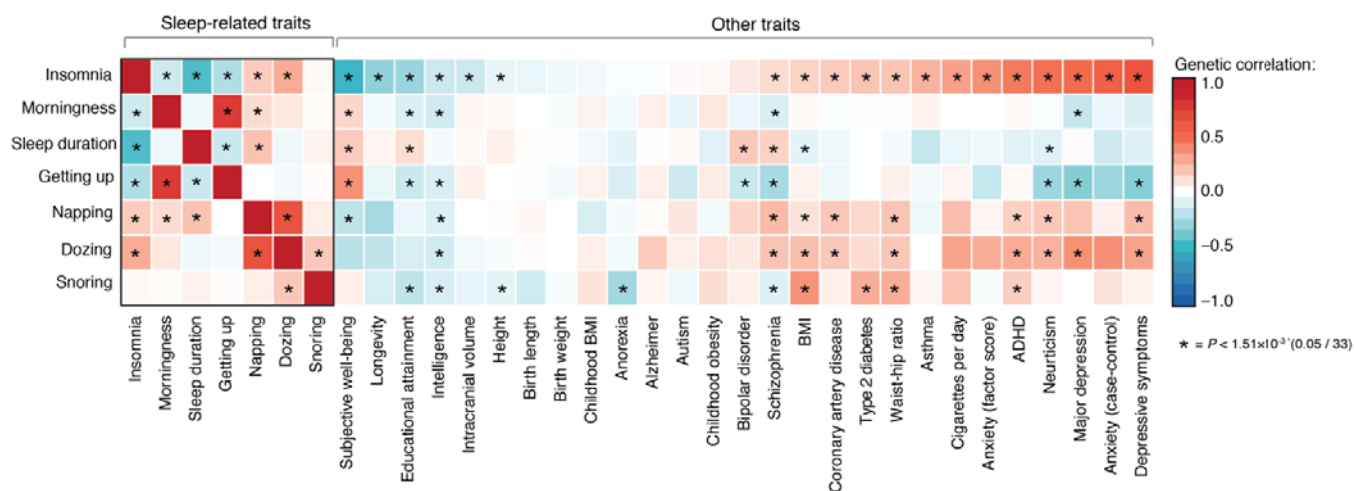

759 **Fig. 4. Genetic overlap of insomnia with other sleep-related traits and psychiatric and metabolic**  
 760 **traits.** Heatmap of genetic correlations between insomnia, sleep-related phenotypes and  
 761 neuropsychiatric and metabolic traits studies that were calculated using LD Score regression. Red  
 762 color indicates a positive  $r_g$  while green indicates negative  $r_g$ . Correlations that were significant after  
 763 Bonferroni correction ( $P < 0.05/33 = 1.5110^{-3}$ ) are indicated with an asterisk (see also **Supplementary**  
 764 **Table 18, 26**).

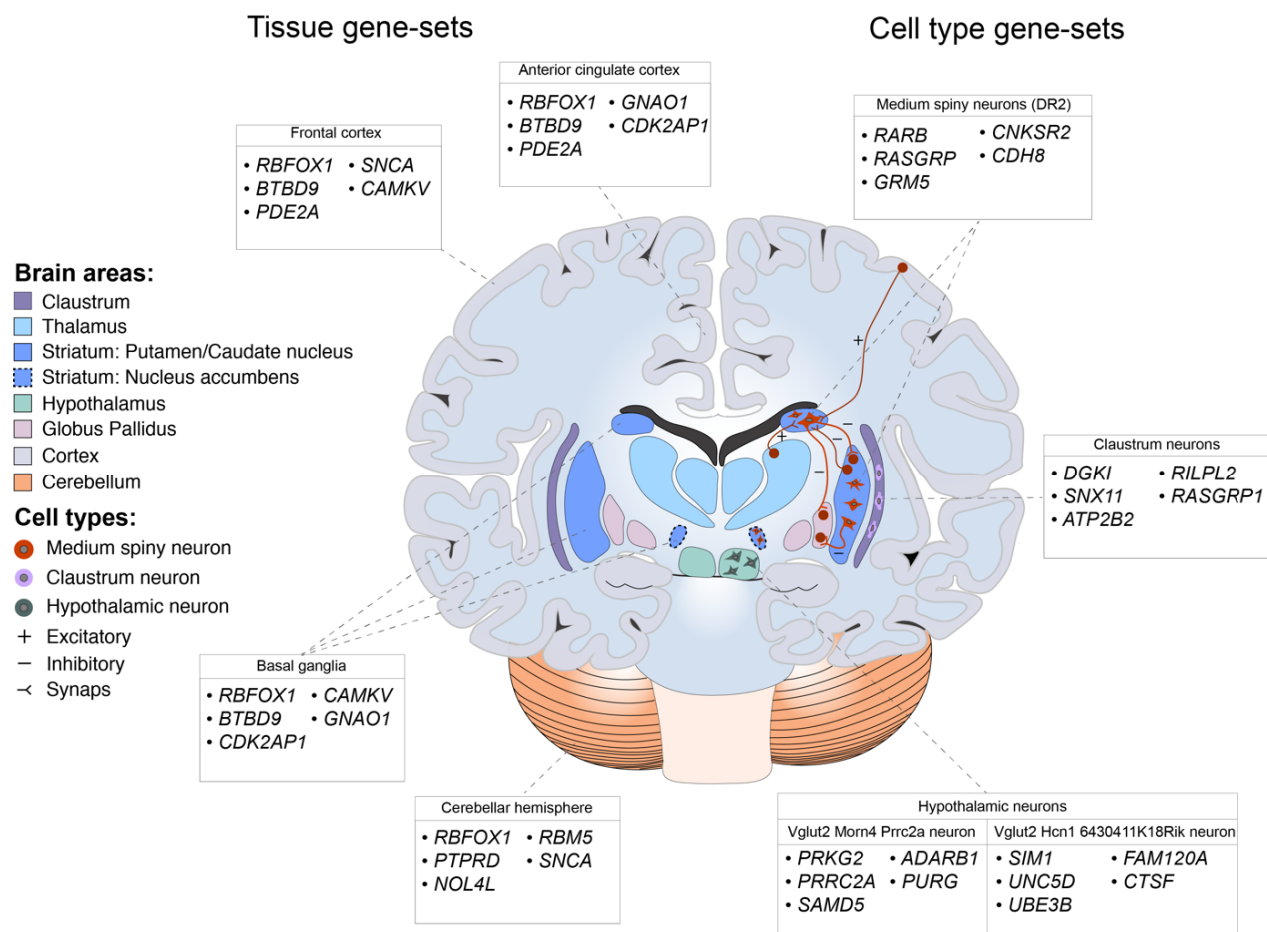

765 **Fig. 5. Overview of brain tissues and cell types associated with insomnia based on GWAS results**  
 766 **from 1,331,010 individuals.** For each associated gene-set, the top 5 genes driving the association are  
 767 reported. Results for GTEx brain tissue type gene-sets are shown on the left side of the figure, while  
 768 results from the level 2 single-cell gene expression are shown on the right.



769 **EXTENDED DATA**

770

771 **Extended Data Table 1. LD Score regression estimates of the sex-specific GWAS of**  
772 **insomnia.** Results are shown for UK Biobank, 23andMe and the sex-specific meta-analyzed  
773 sample. H<sup>2</sup>=estimated SNP-heritability, intercept=LD Score regression intercept, rg=genetic  
774 correlation in the same study sample.

775

| Sample            | Sex    | N       | <i>h</i> <sup>2</sup> (SE) | Mean chi <sup>2</sup> | Lambda | Intercept (SE)   | <i>rg</i> male   | <i>rg</i> female |
|-------------------|--------|---------|----------------------------|-----------------------|--------|------------------|------------------|------------------|
| <b>UK Biobank</b> | male   | 177.817 | 0.083<br>(0.007)           | 1,157                 | 1,143  | 1.001<br>(0.008) | 1                | 0.857<br>(0.051) |
|                   | female | 208.716 | 0.092<br>(0.005)           | 1,233                 | 1,210  | 1.011<br>(0.008) | 0.857<br>(0.051) | 1                |
| <b>23andMe</b>    | male   | 443.207 | 0.080<br>(0.004)           | 1,385                 | 1,317  | 1.016<br>(0.008) | 1                | 0.925<br>(0.022) |
|                   | female | 501.270 | 0.090<br>(0.003)           | 1,580                 | 1,460  | 1.046<br>(0.009) | 0.925<br>(0.022) | 1                |
| <b>Meta</b>       | male   | 621.024 | 0.067<br>(0.003)           | 1,460                 | 1,382  | 1.024<br>(0.009) | 1                | 0.919<br>(0.018) |
|                   | female | 709.986 | 0.078<br>(0.003)           | 1,700                 | 1,547  | 1.042<br>(0.009) | 0.919<br>(0.018) | 1                |

776

777

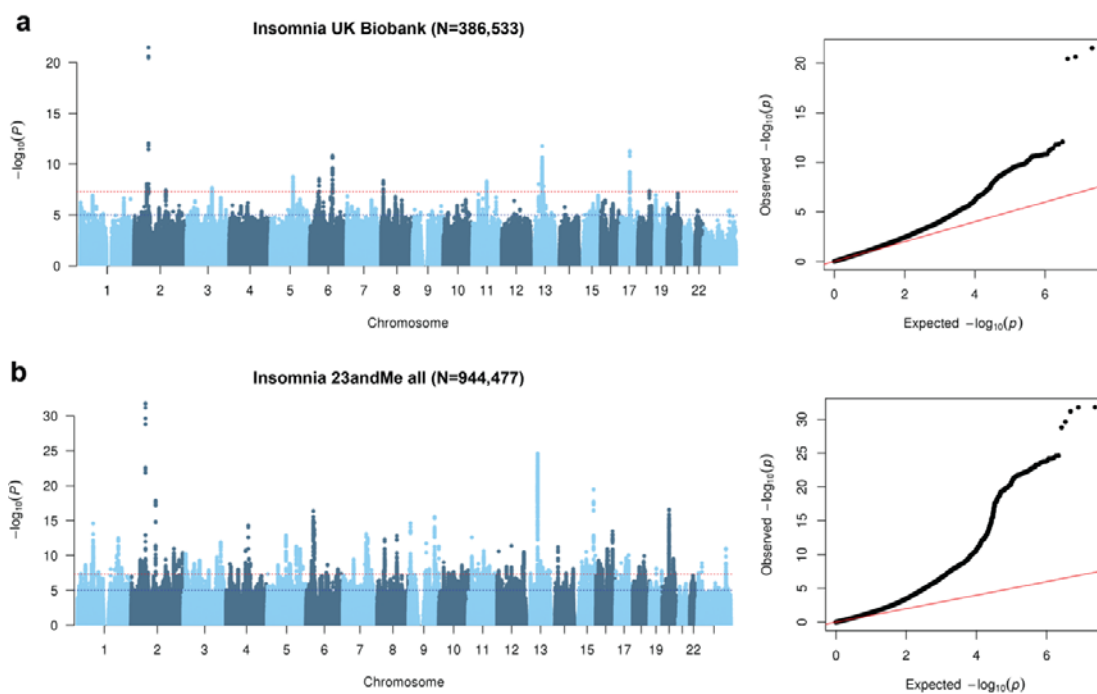

778 **Extended Data Fig 1a-b. Manhattan and Q-Q plots of the genome-wide analysis of**  
779 **insomnia.** Results are shown for the genome-wide analysis in **(a)** UK Biobank and **(b)**  
780 23andMe.  
781

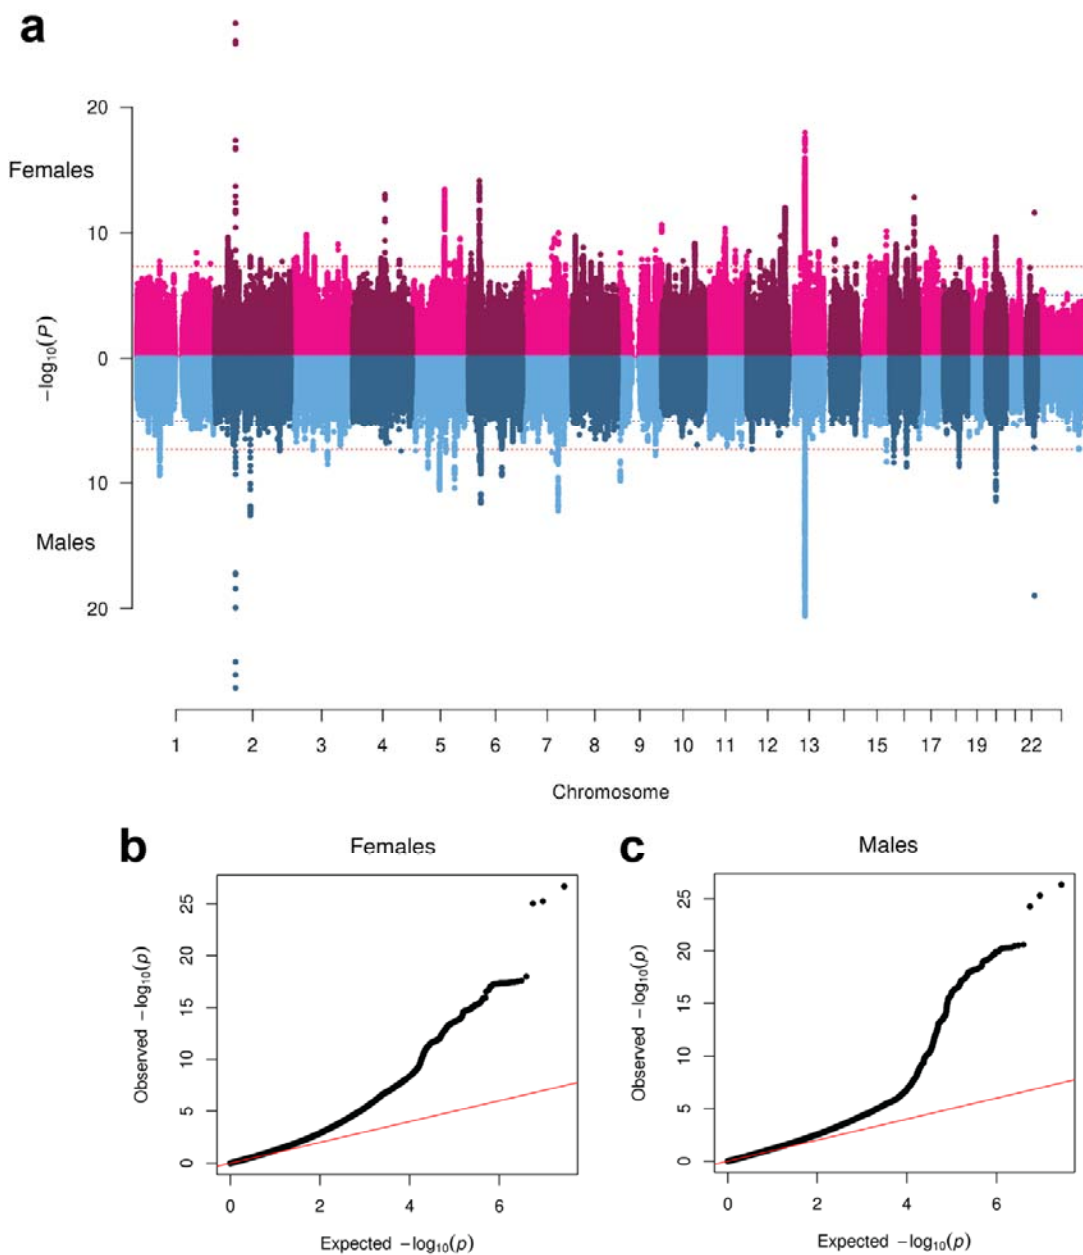

782 **Extended Data Fig. 3a-c. Sex-specific Manhattan plot and Q-Q plot of the insomnia**  
783 **meta-analysis in males and females (UK Biobank + 23andMe).** (a) Miami plot showing  
784 sex-specific SNP association P-values for females on the upper side and males on the lower  
785 side. (b) Q-Q plot in females, and (c) in males.

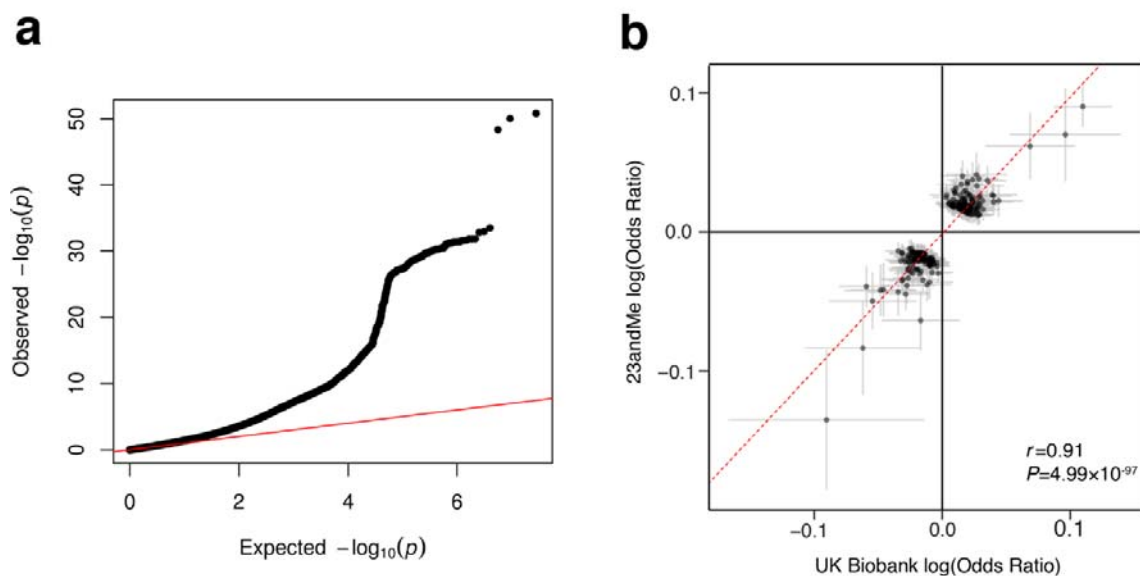

786 **Extended Data Fig. 4a-b. Q-Q plot and lead SNPs of the GWAS meta-analysis for**  
787 **insomnia.** (a) QQ-plot of the insomnia meta-analysis showing the expected negative log10-  
788 transformed  $P$ -value distribution on the x-axis, and observed negative log10-transformed  $P$ -  
789 value on the y-axis, (b) effect size plot of the 248 lead SNP of the insomnia meta-analysis  
790 (log-transformed odds ratio and 95% confidence interval) in UK Biobank and 23andMe.  
791

792  
793  
794  
795  
796  
797  
798  
799  
800  
801  
802  
803  
804

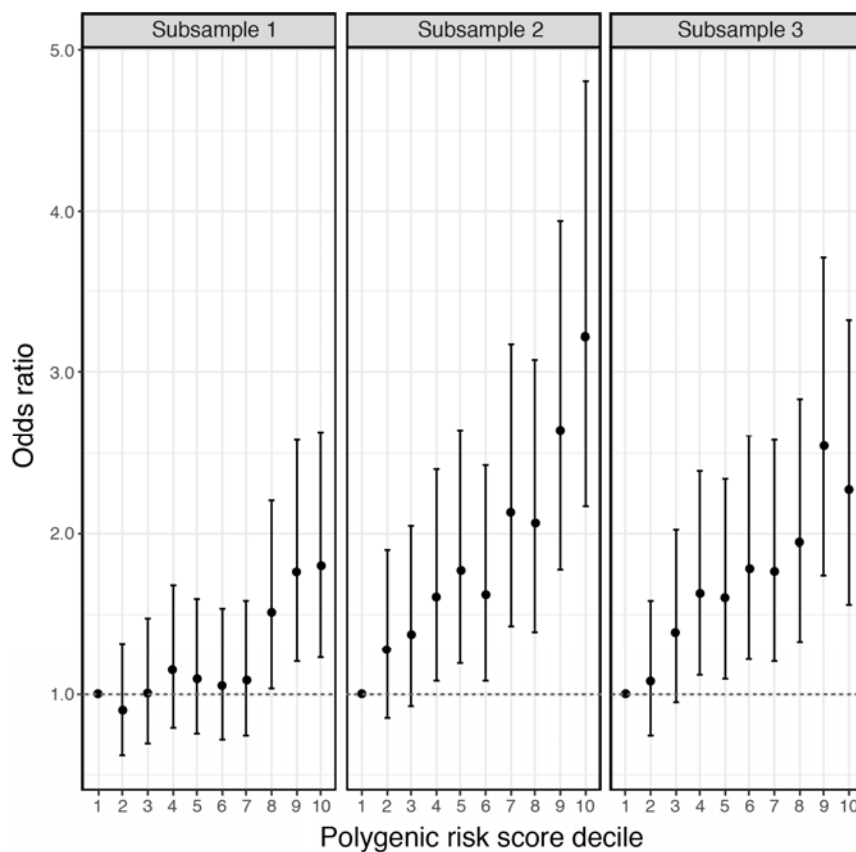

805 **Extended Data Fig. 5. Risk of insomnia per polygenic risk score decile in three**  
806 **independent holdout samples (N=3x3000).** Odds ratios and 95% confidence interval for  
807 deciles in polygenic risk score were calculated based on a logistic regression model, using the  
808 lowest polygenic risk score decile as the reference.

809

810

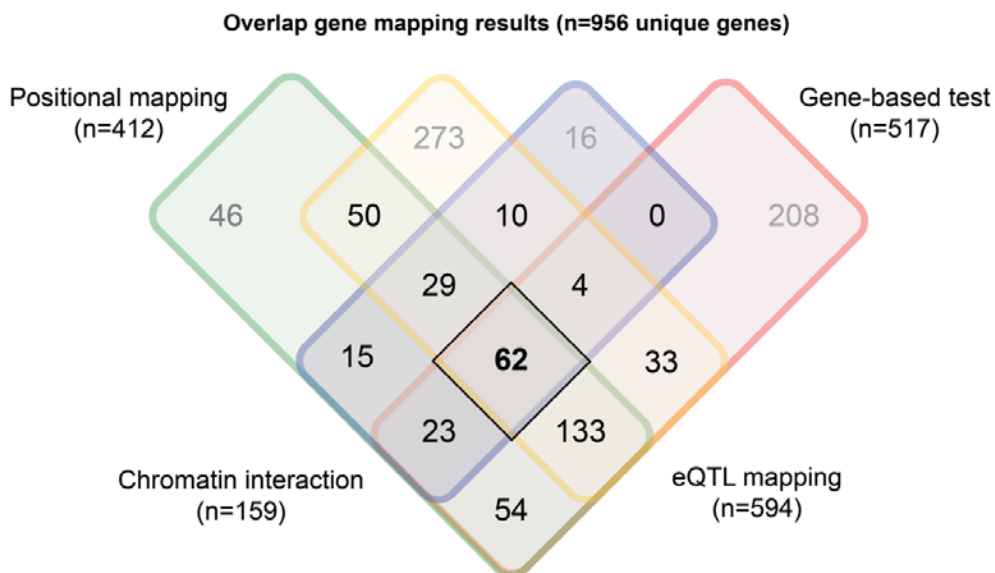

811 **Extended Data Fig. 6. Venn diagram showing the number of genes that were mapped by**  
812 **four gene-mapping strategies.** Each square shows the number of overlapping genes between  
813 three gene-mapping methods in FUMA (positional mapping, eQTL mapping and chromatin  
814 interaction mapping) and significant genes in gene-based tests in MAGMA. The number of  
815 genes in bold highlights the number of genes that were implicated by all four methods.  
816

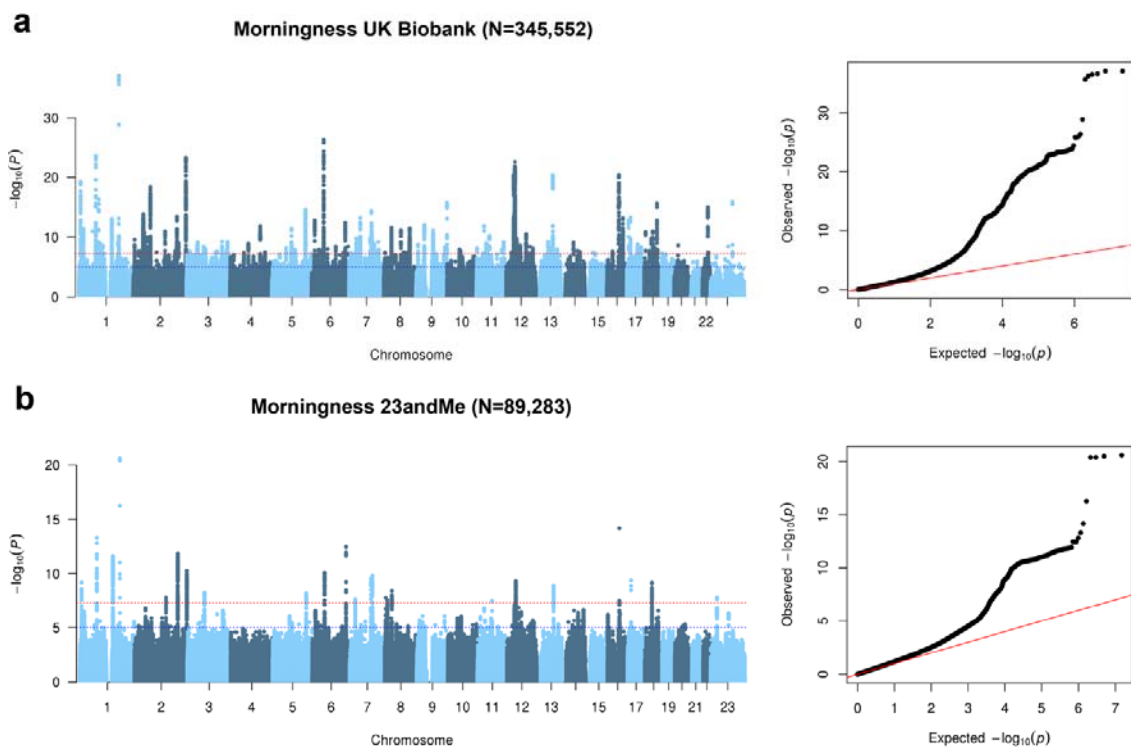

817 **Extended Data Fig. 7. Manhattan plot and Q-Q plot of the genome-wide analysis of**  
818 **morningness in UK Biobank and 23andMe. Results are shown for (a) UK Biobank and (b)**  
819 **23andMe.**  
820

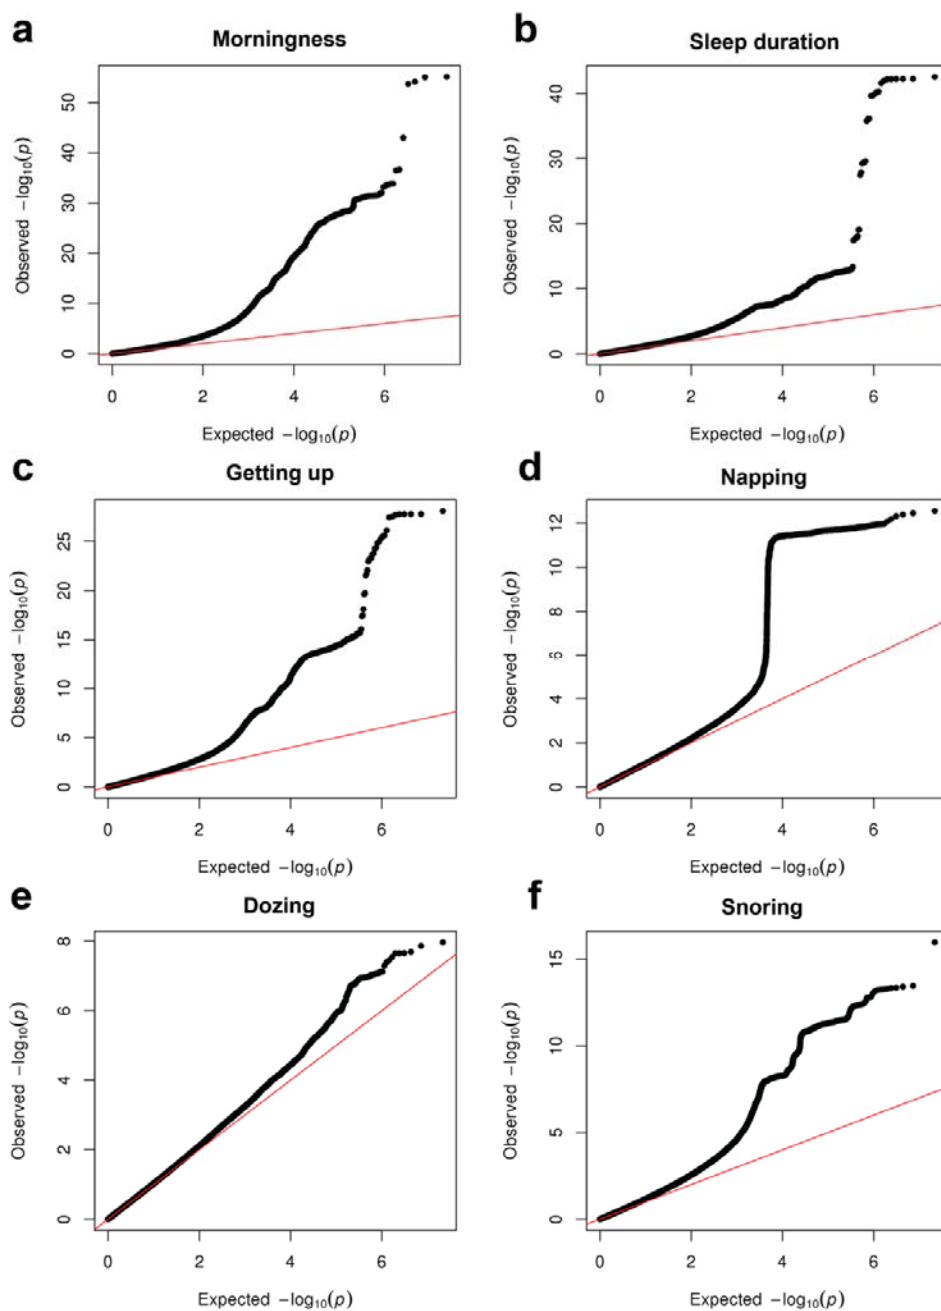

821 **Extended Data Fig. 8 Q-Q plots of the genome-wide analysis of six sleep related traits.**  
822 **(a)** morningness (including UKB and 23andMe), **(b)** sleep duration, **(c)** ease of getting up, **(d)**  
823 daytime napping, **(e)** daytime dozing, **(f)** snoring. Manhattan plots of the genome-wide  
824 analyses are shown in **Fig. 3**.  
825



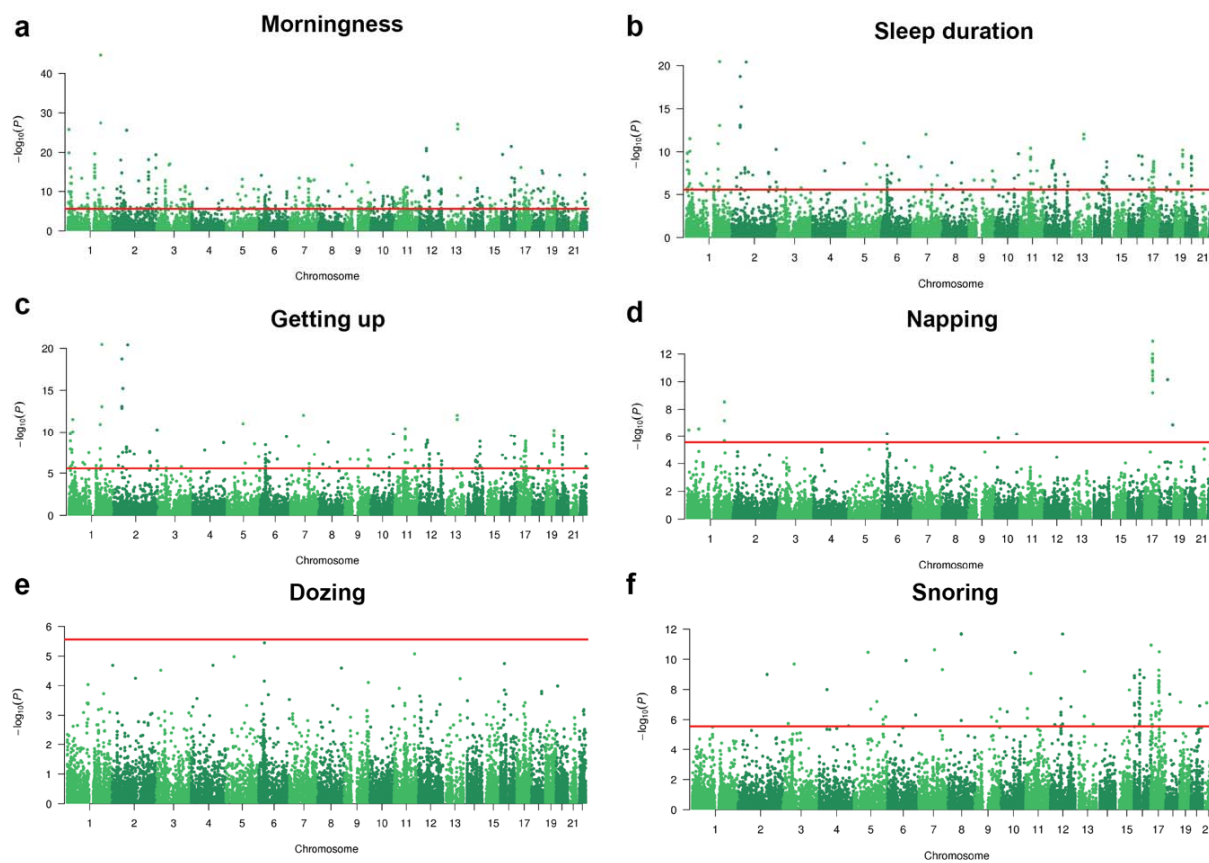

826 **Extended Data Fig. 9a-f. Genome-wide gene-based association analysis of six sleep-**  
827 **related phenotypes.** Manhattan plots genome-wide gene-based analysis (GWGAS) results  
828 for (a) morningness (b) sleep duration (c) ease of getting up (d) daytime napping (e) daytime  
829 dozing (f) snoring. GWGAS was performed in MAGMA. The analysis of morningness was  
830 based on GWAS meta-analysis of UKB and 23andMe, while other sleep-related phenotypes  
831 were analysed in UKB. The red line indicates Bonferroni corrected significance threshold  
832 depending on the number of genes tested.  
833

Supplementary Information includes:

- 1. Supplementary Methods**
  - 1.1 Sample description UK Biobank
  - 1.2 Sample description 23andMe
  - 1.3 Insomnia phenotype validation external sample
- 2. Supplementary Discussion**
  - 2.1. Sex-specific association results for insomnia
  - 2.2. GWAS meta-analysis results for insomnia
  - 2.3. Implicated genes for insomnia
  - 2.4. Gene-set association results for insomnia
  - 2.5. Results sleep-related phenotypes
  - 2.6 Mendelian Randomization
- 3. Supplementary Figures (1 to 2)**
- 4. Supplementary Tables (1 to 28)**

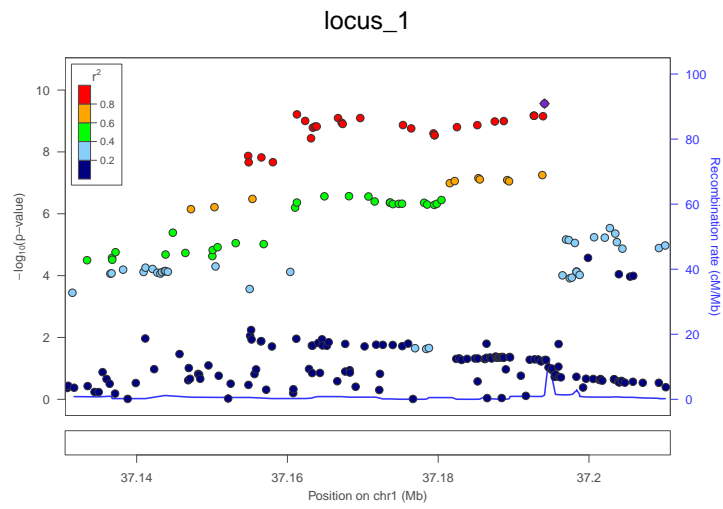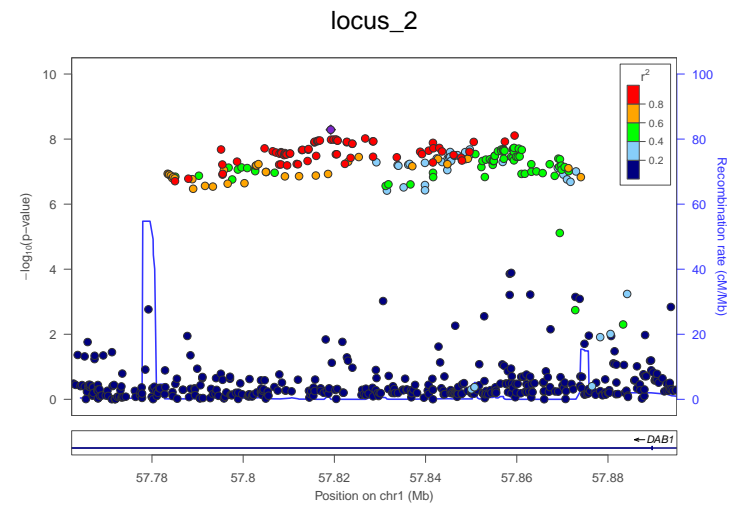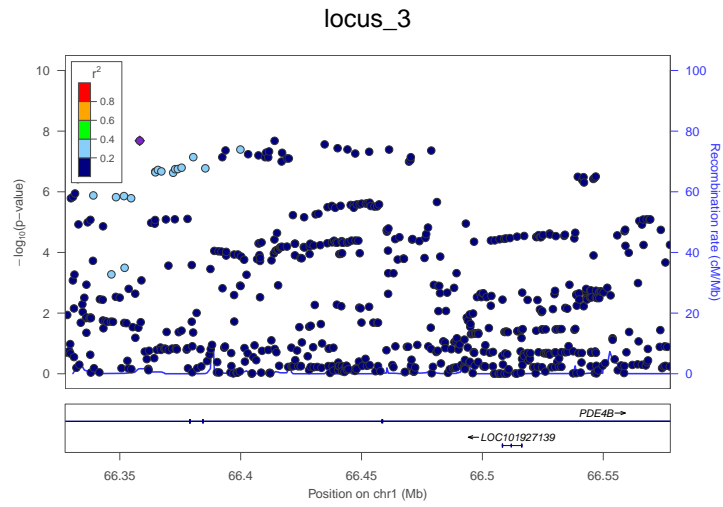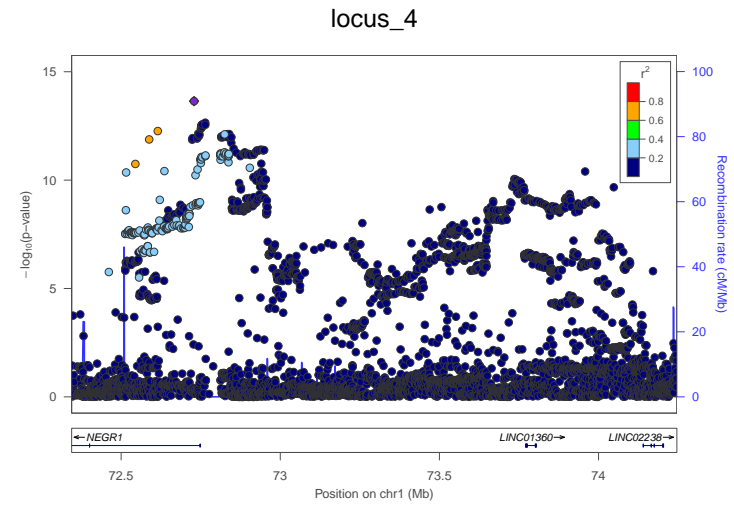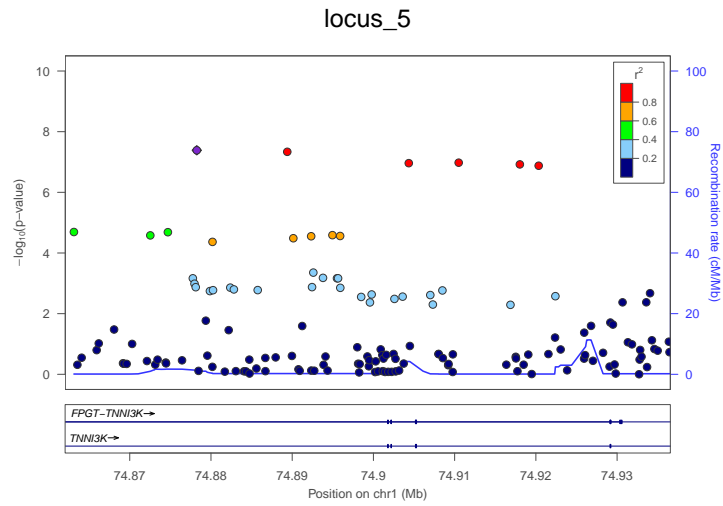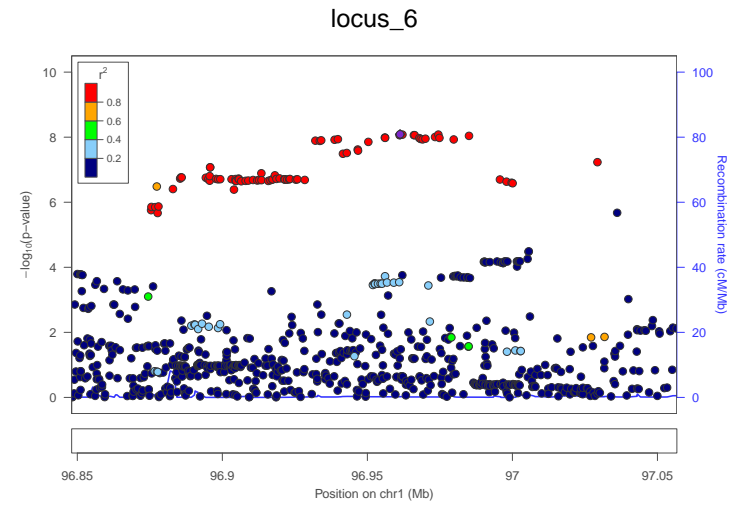

locus\_7

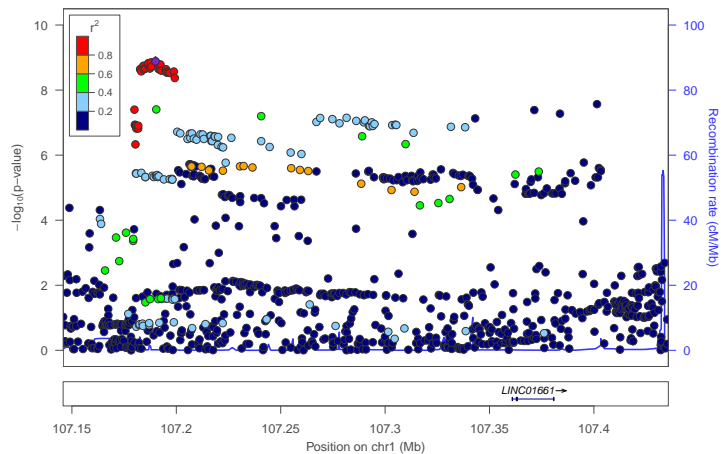

locus\_8

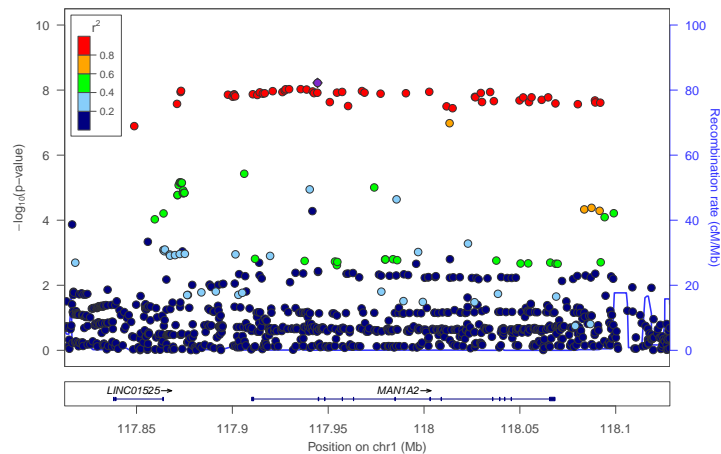

locus\_9

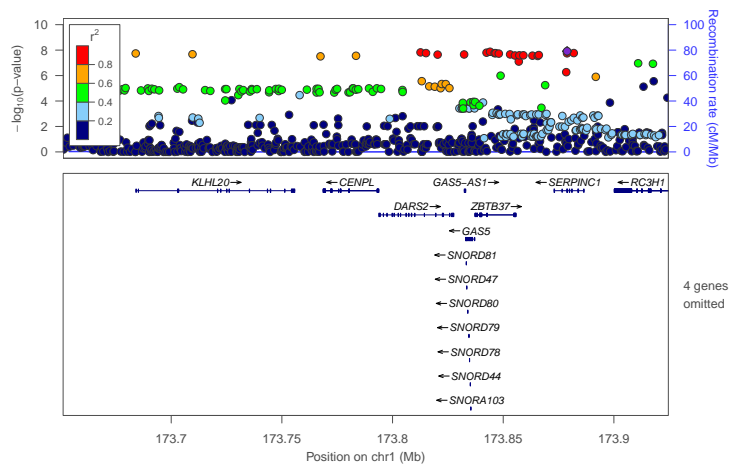

locus\_10

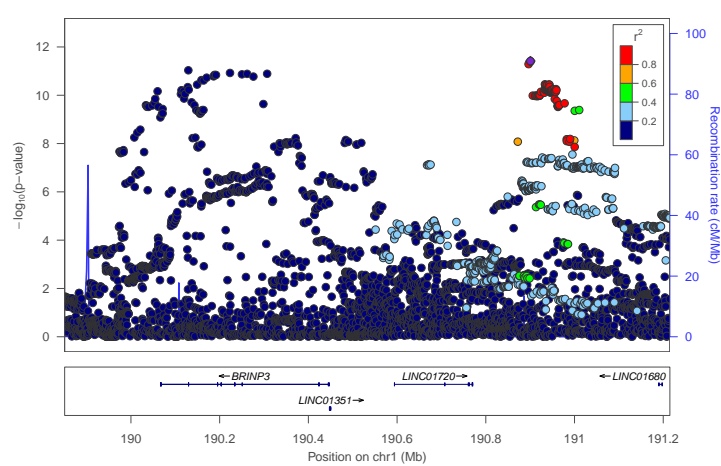

locus\_11

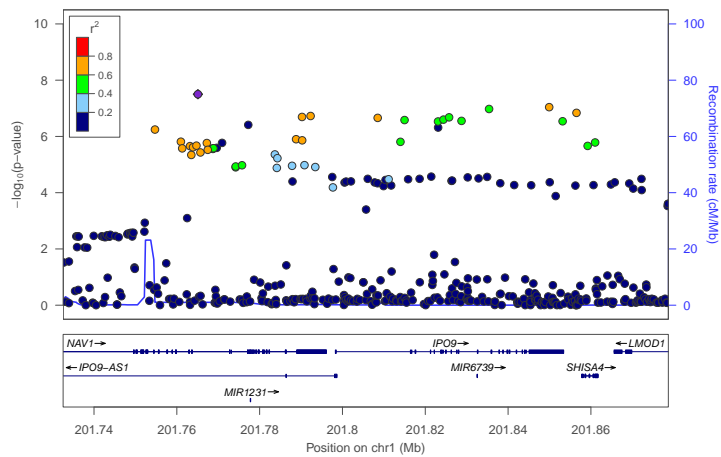

locus\_12

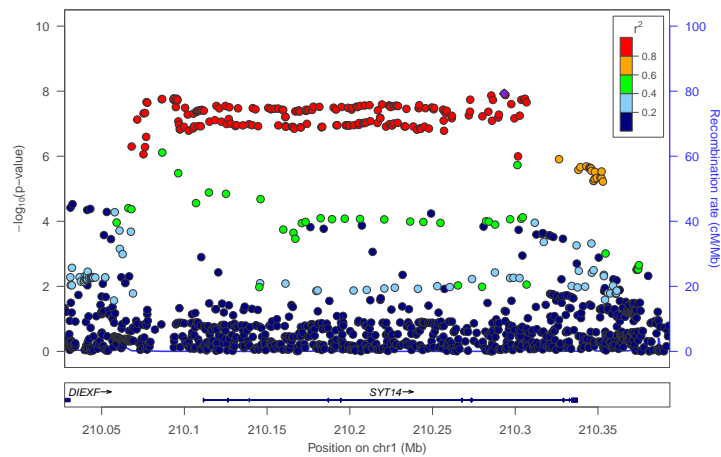

locus\_13

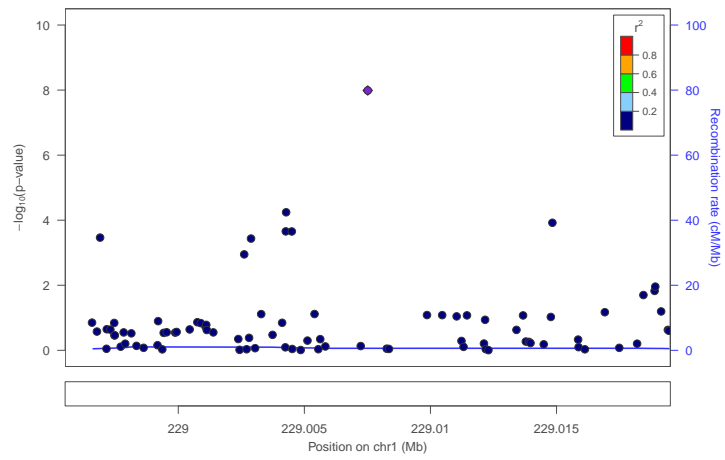

locus\_14

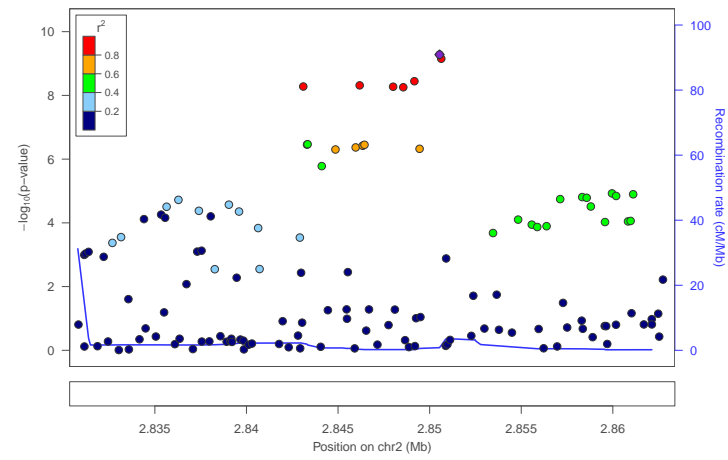

locus\_15

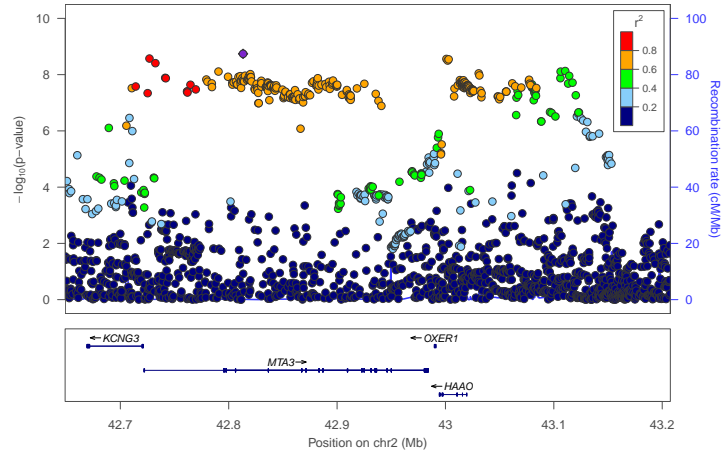

locus\_16

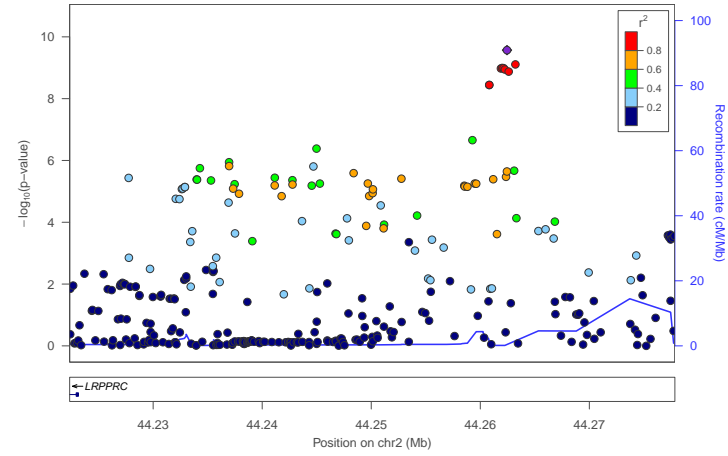

locus\_17

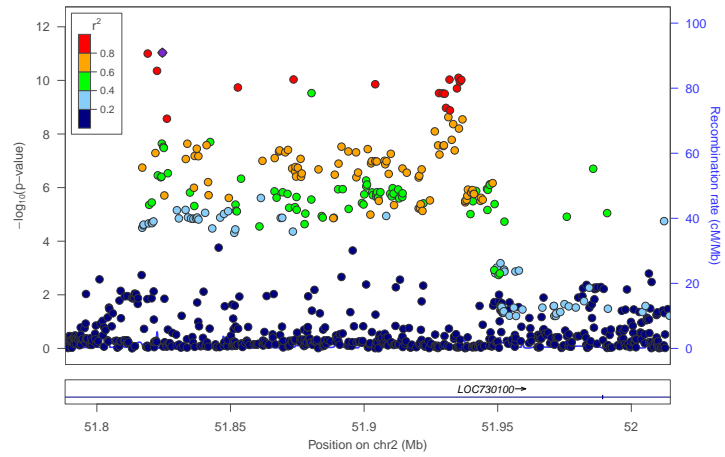

locus\_18

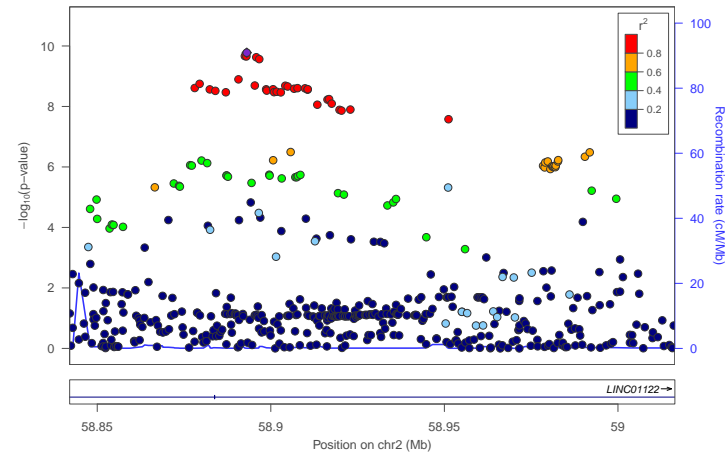

locus\_19

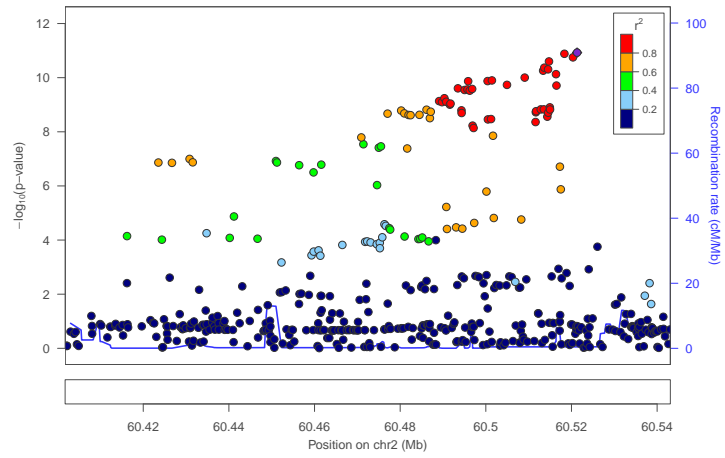

locus\_20

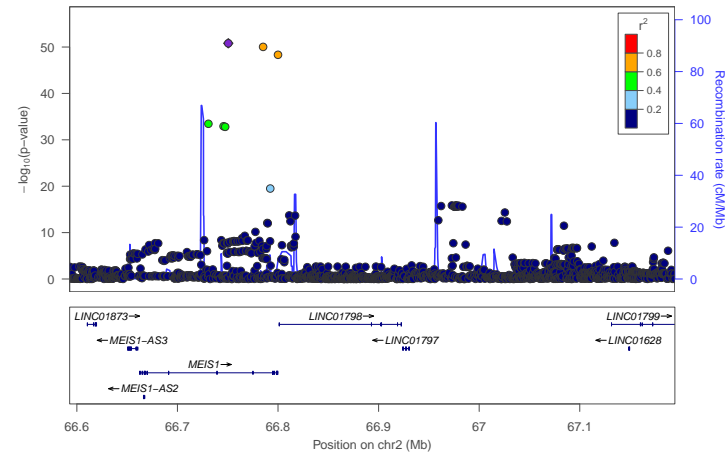

locus\_21

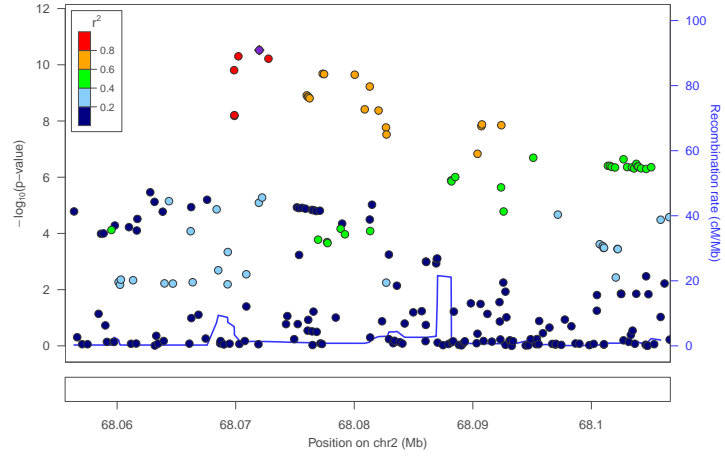

locus\_22

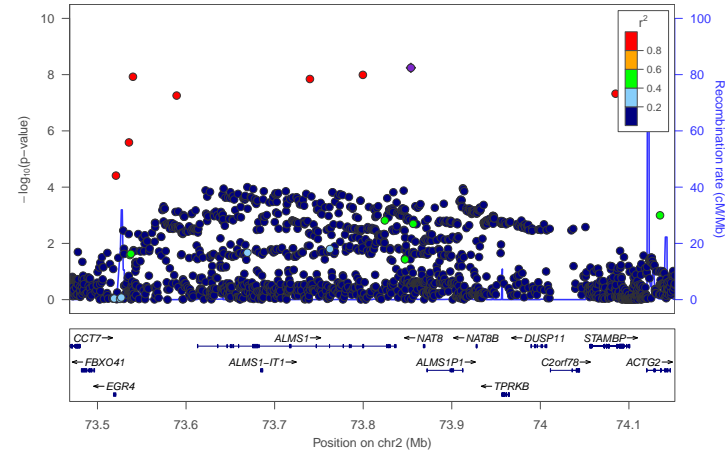

locus\_23

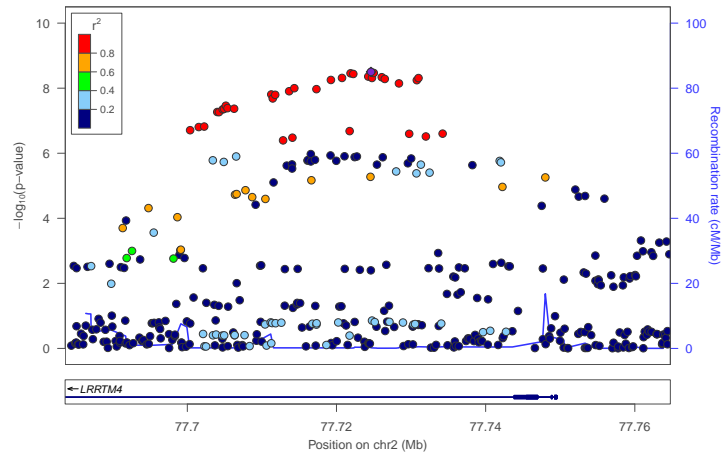

locus\_24

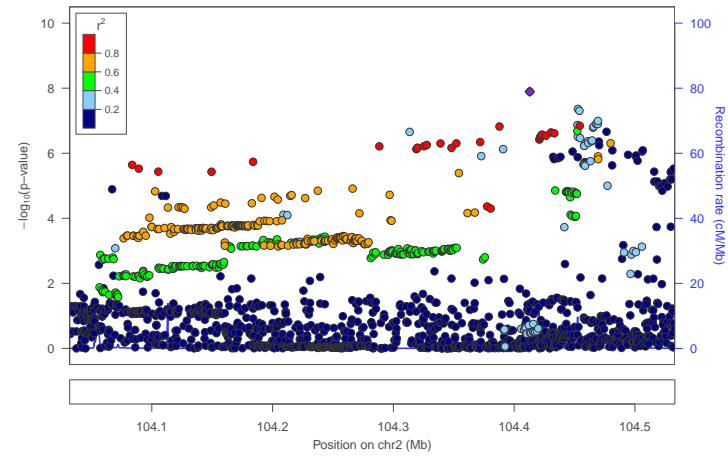

locus\_25

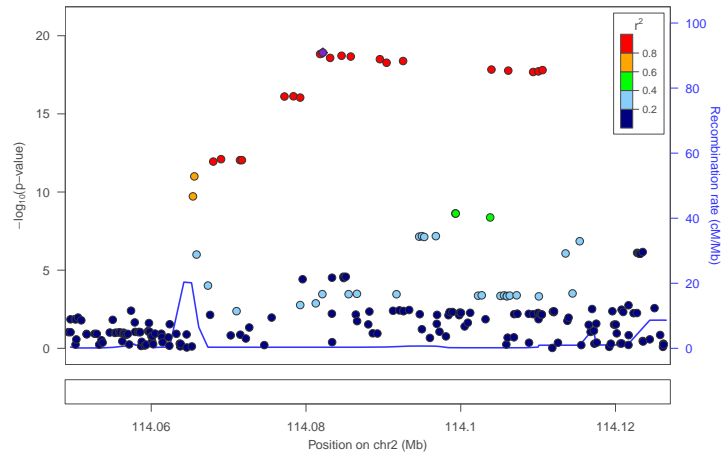

locus\_26

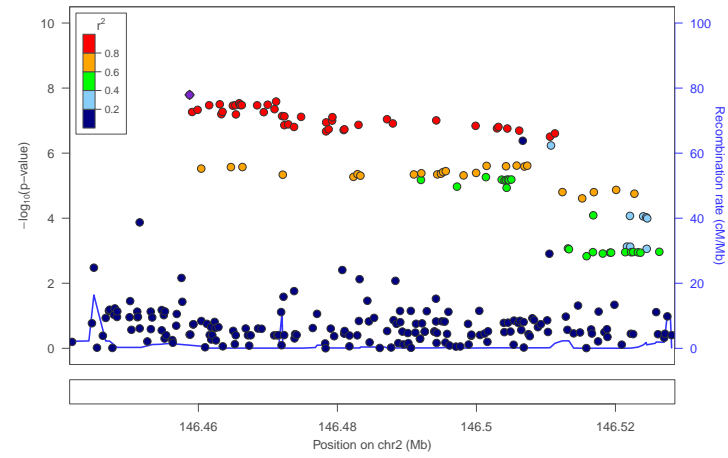

locus\_27

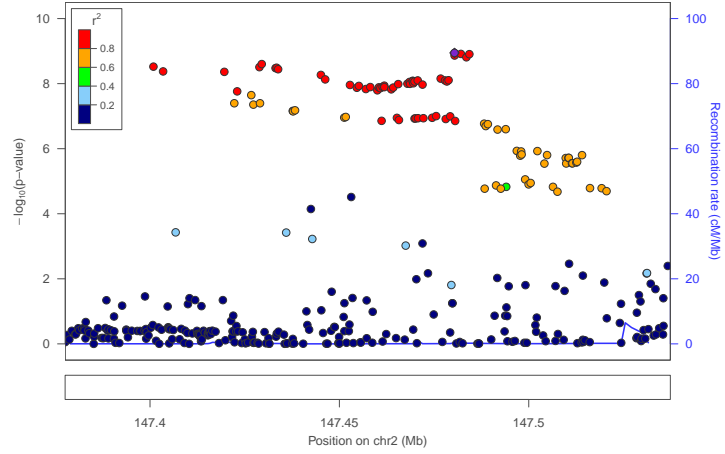

locus\_28

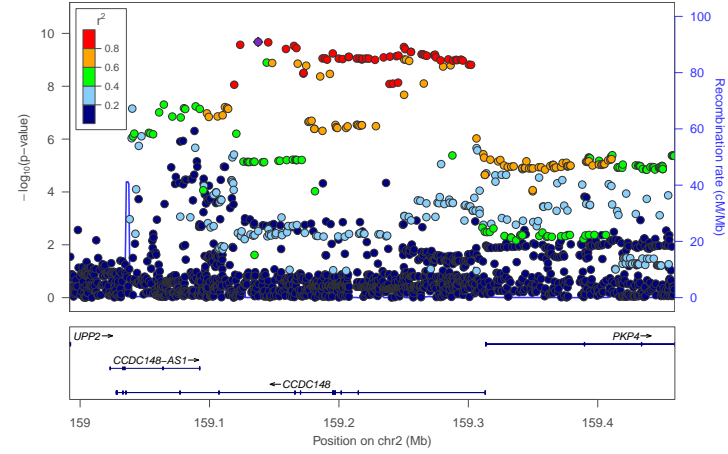

locus\_29

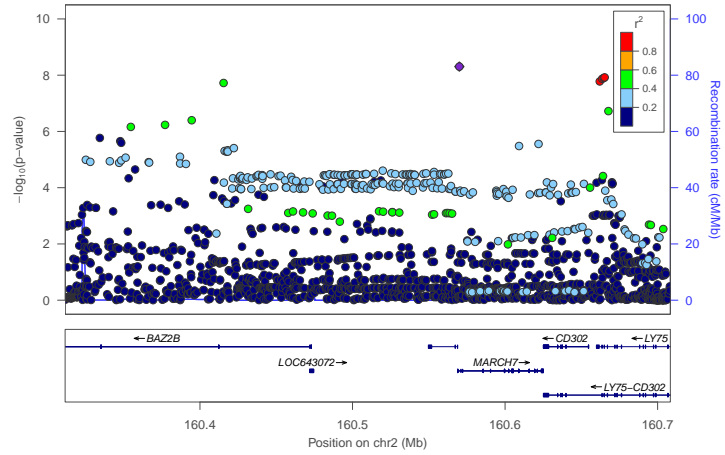

locus\_30

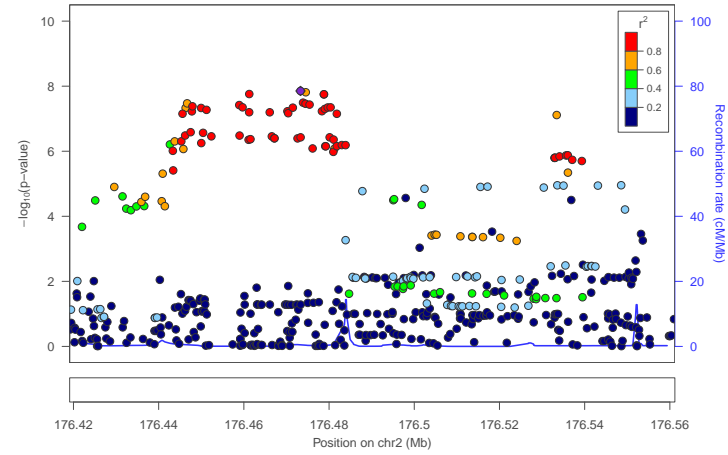



locus\_31

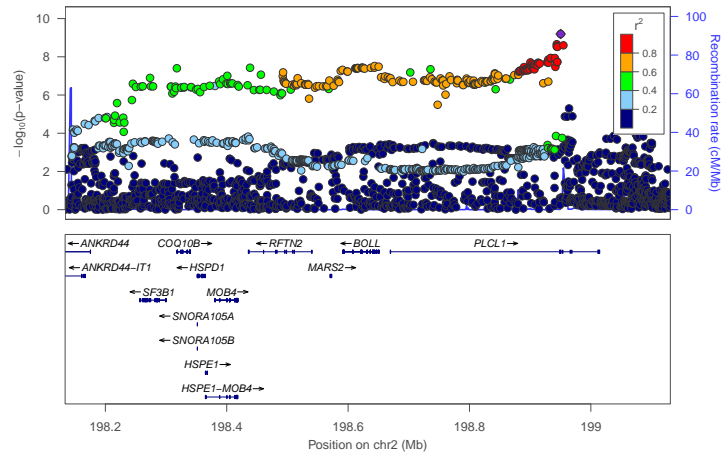

locus\_32

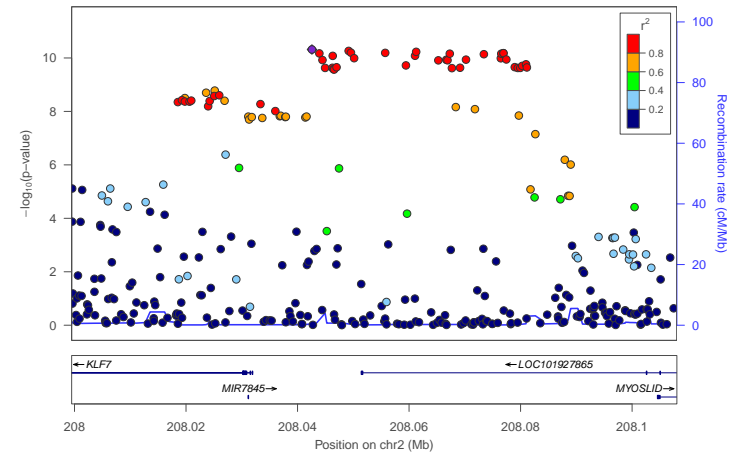

locus\_33

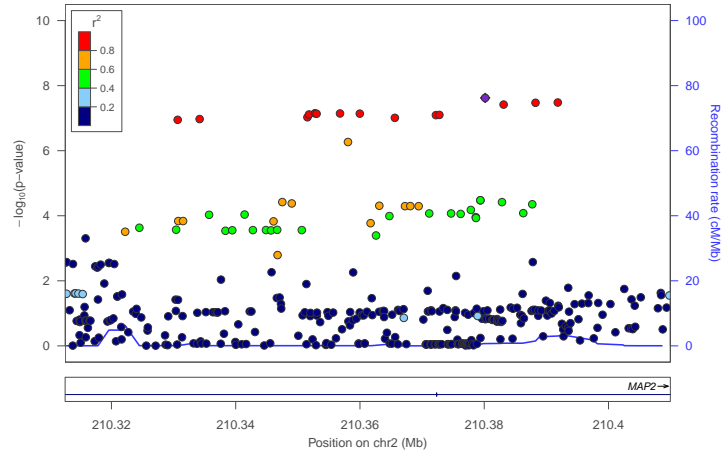

locus\_34

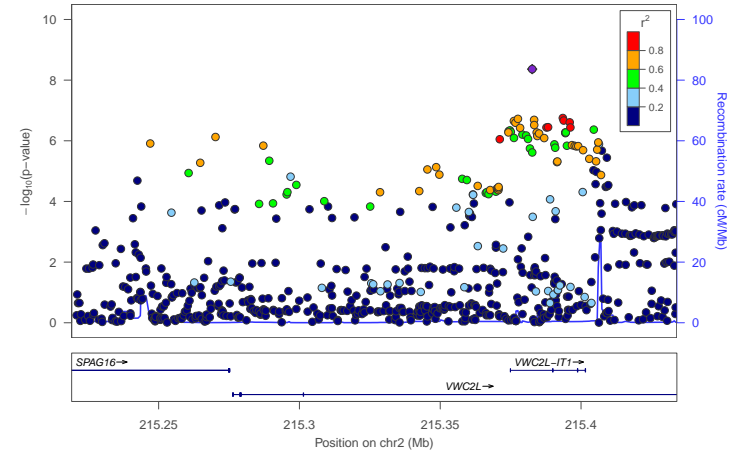

locus\_35

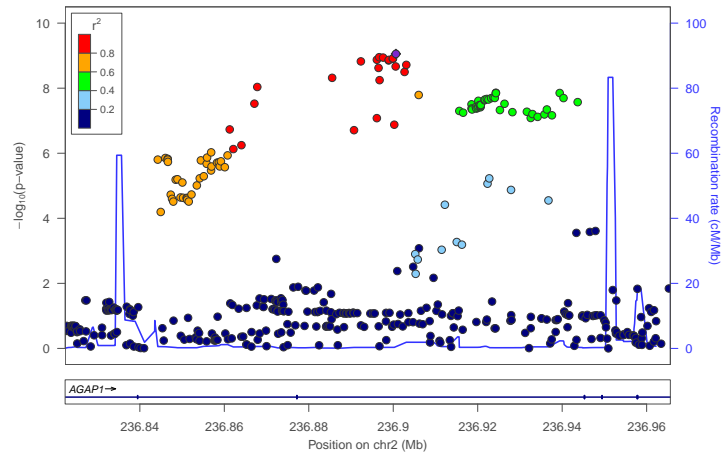

locus\_36

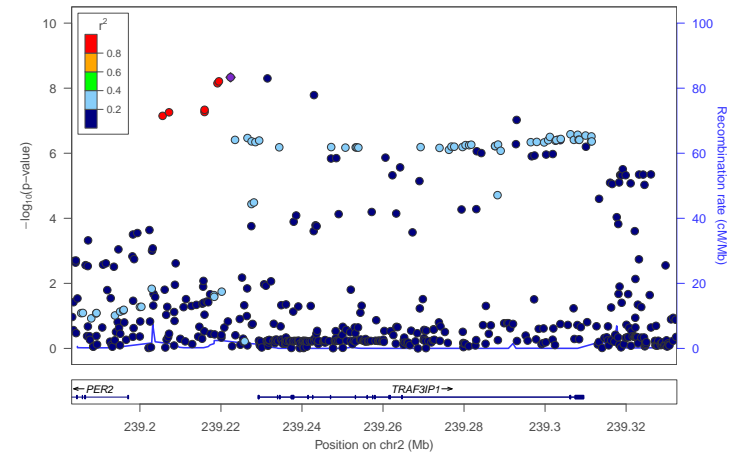



locus\_37

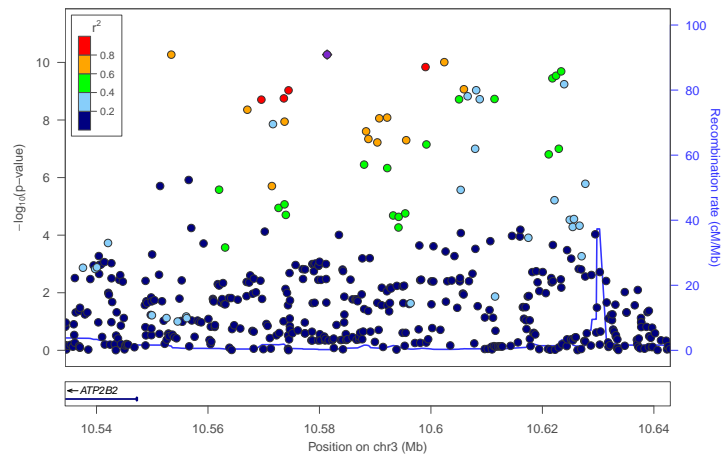

locus\_38

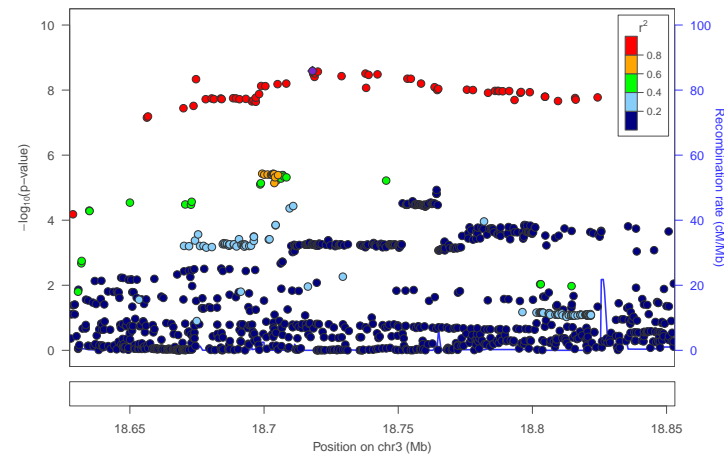

locus\_39

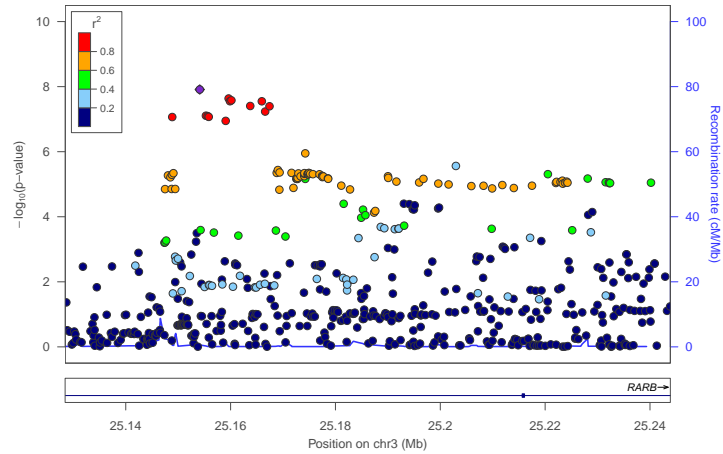

locus\_40

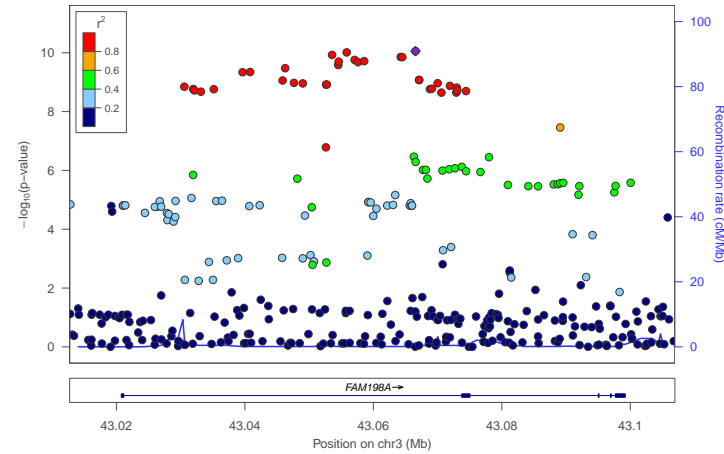

locus\_41

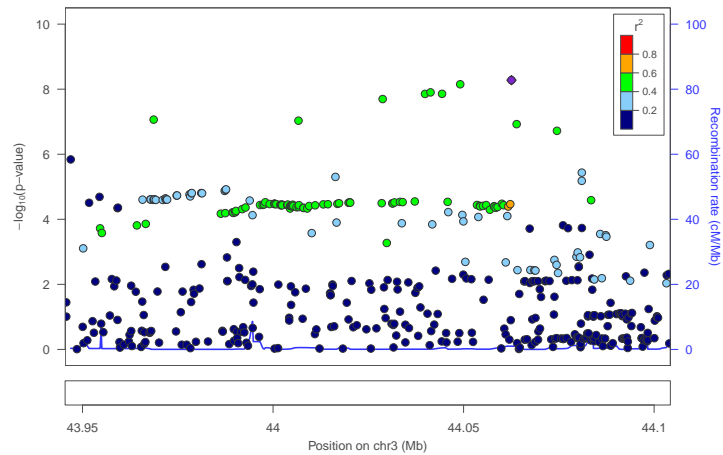

locus\_42

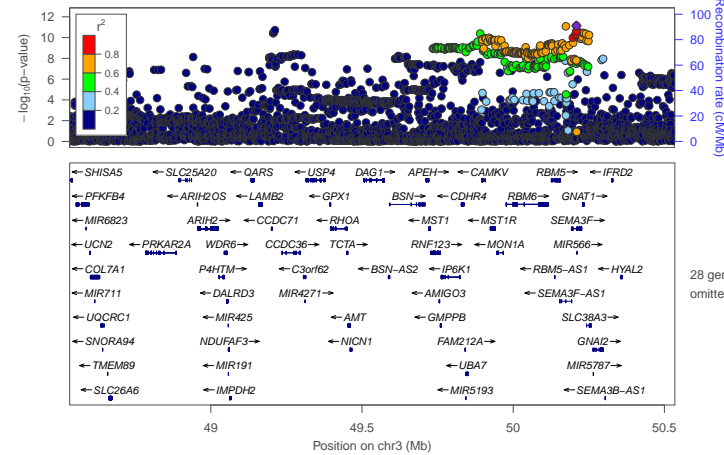

locus\_43

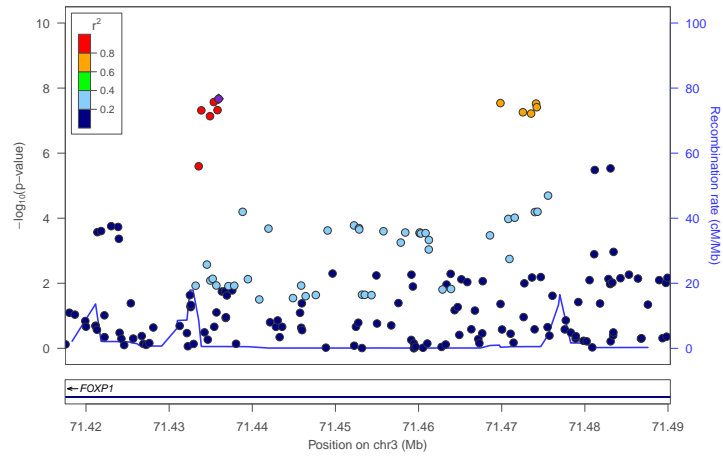

locus\_44

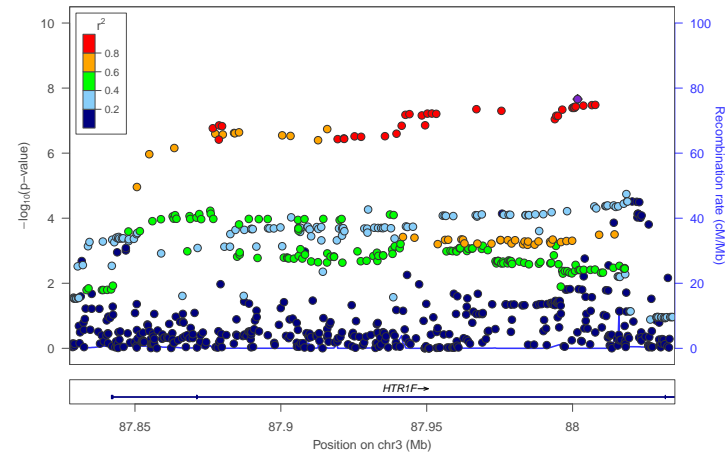

locus\_45

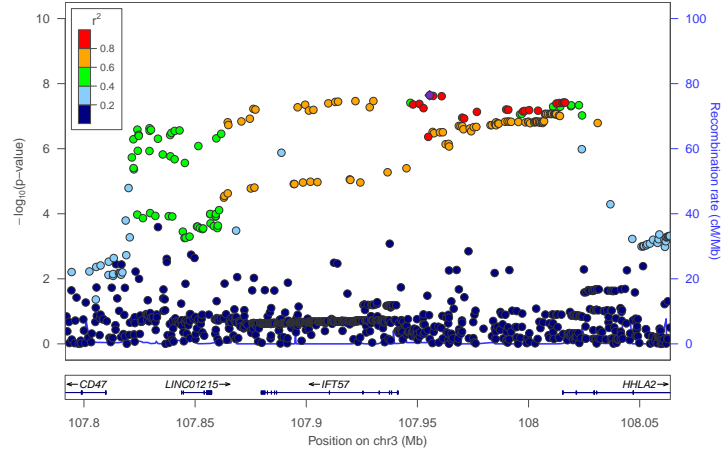

locus\_46

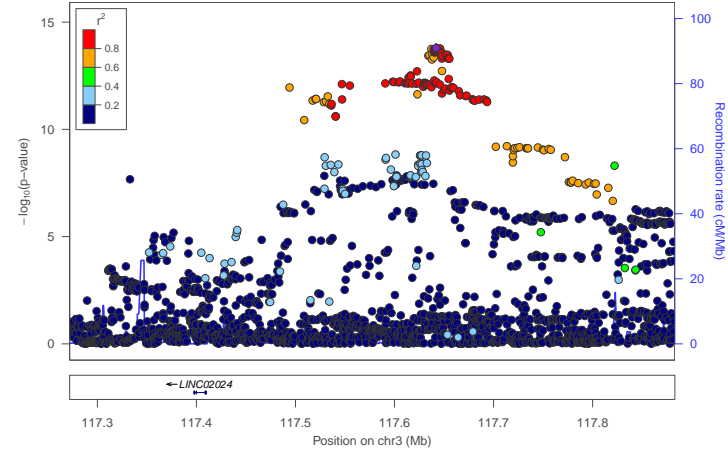

locus\_47

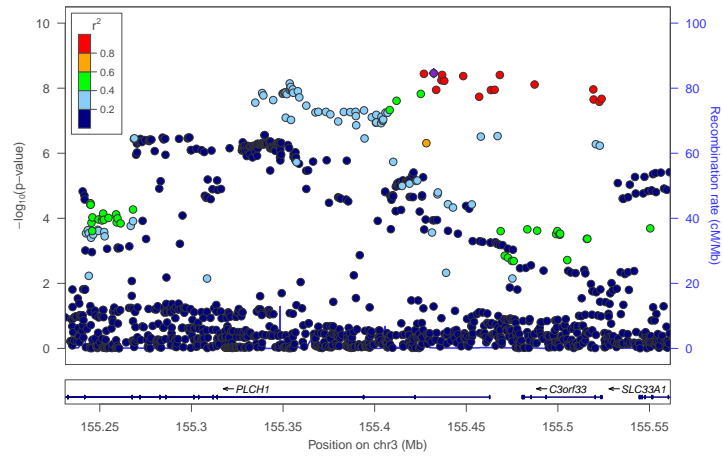

locus\_48

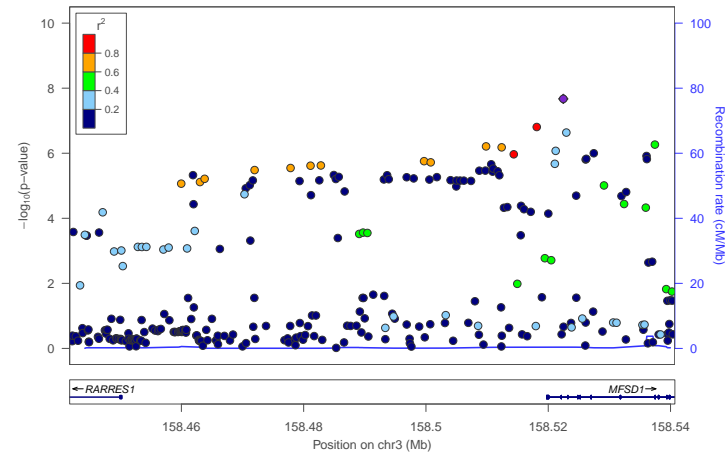

locus\_49

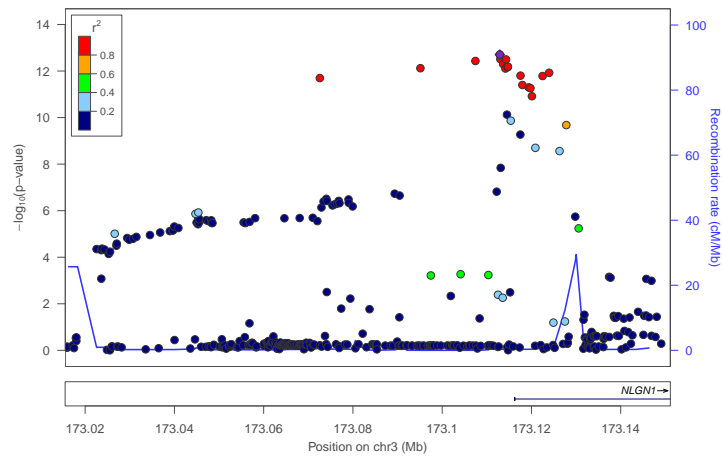

locus\_50

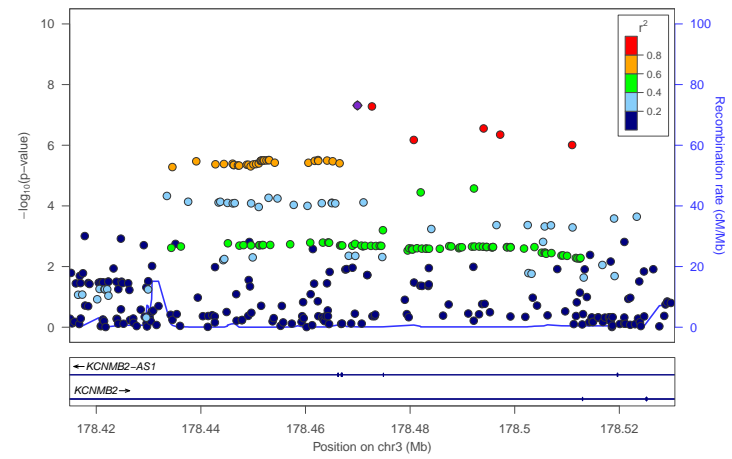

locus\_51

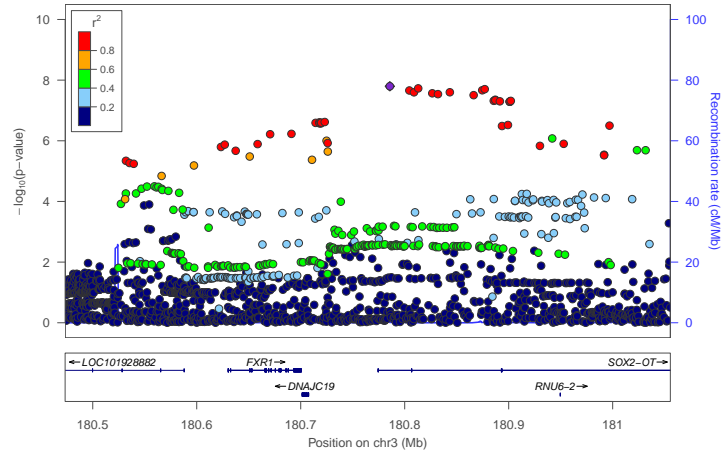

locus\_52

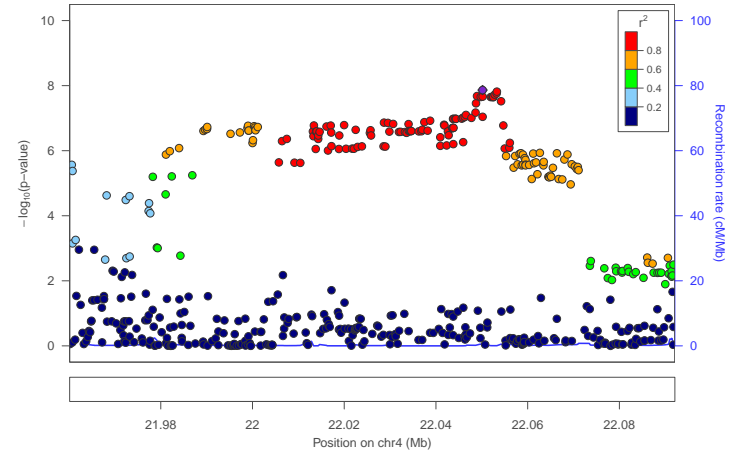

locus\_53

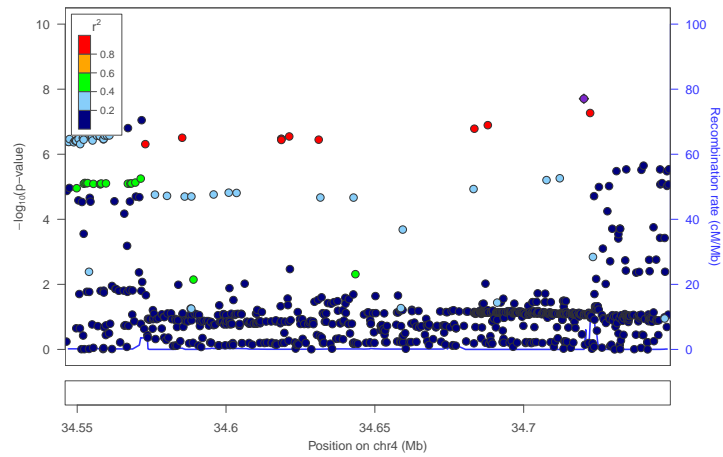

locus\_54

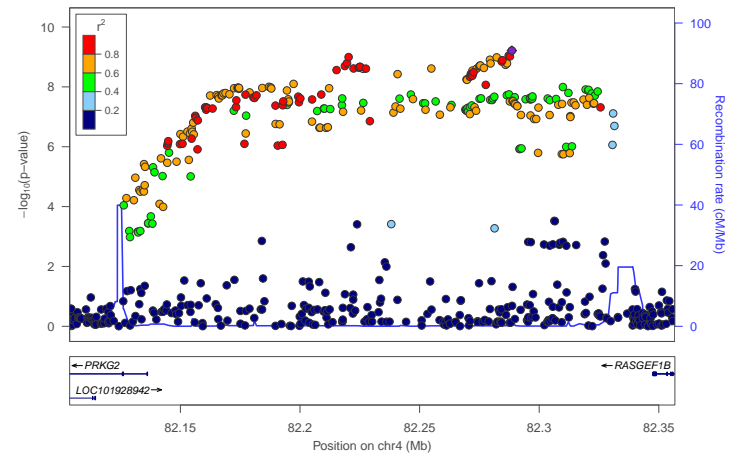

locus\_55

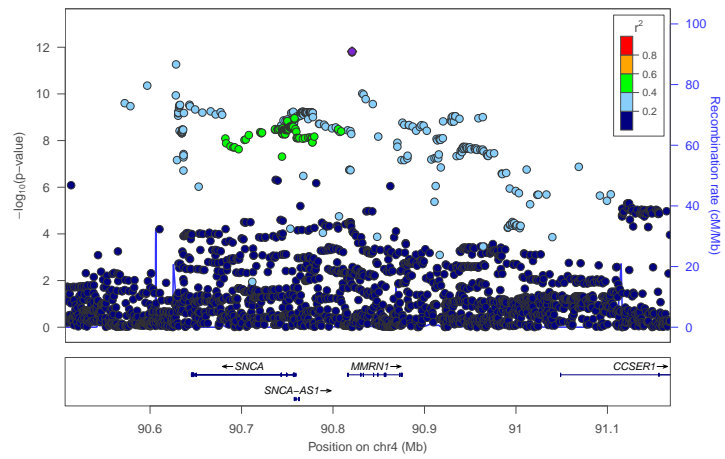

locus\_56

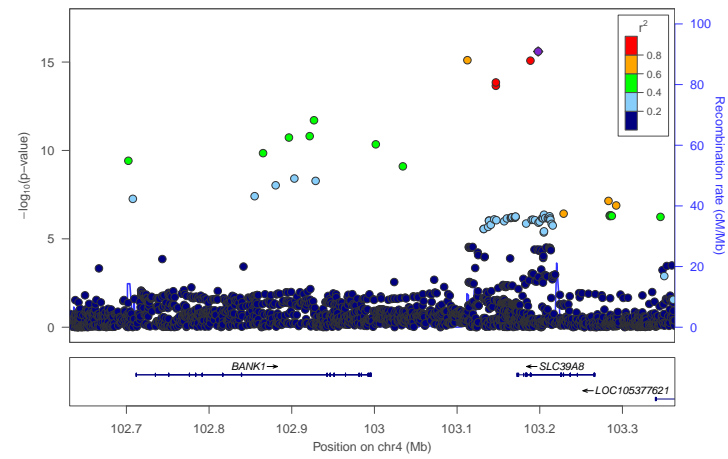

locus\_57

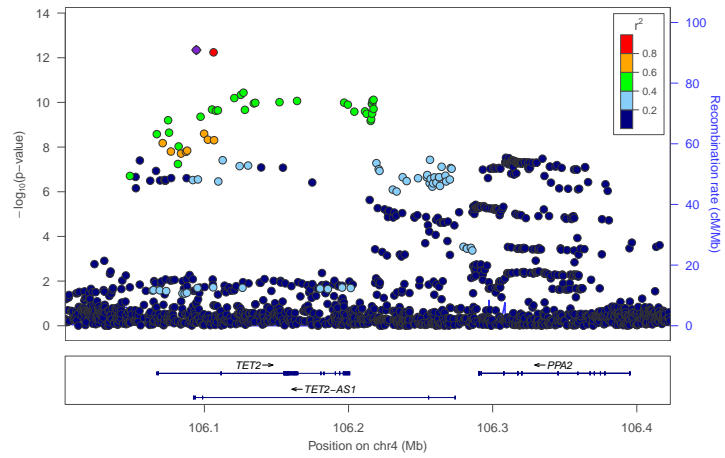

locus\_58

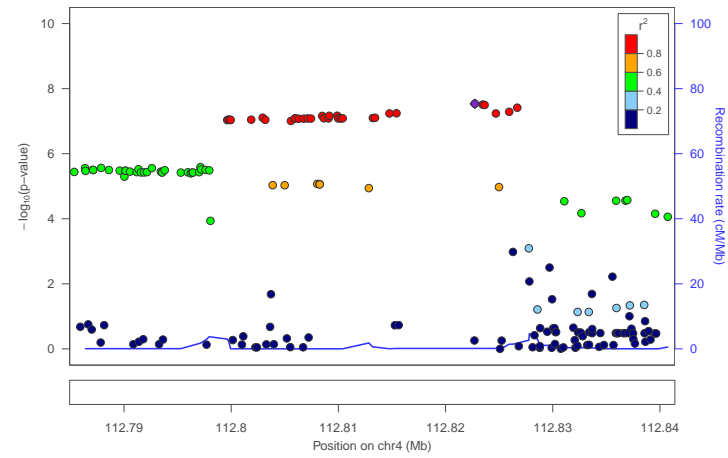

locus\_59

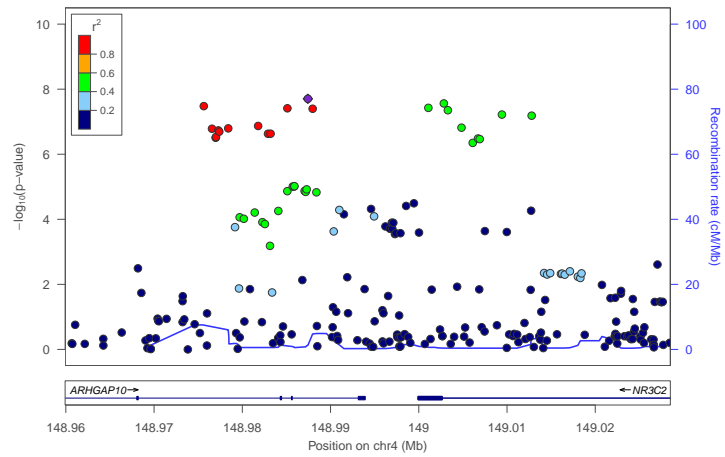

locus\_60

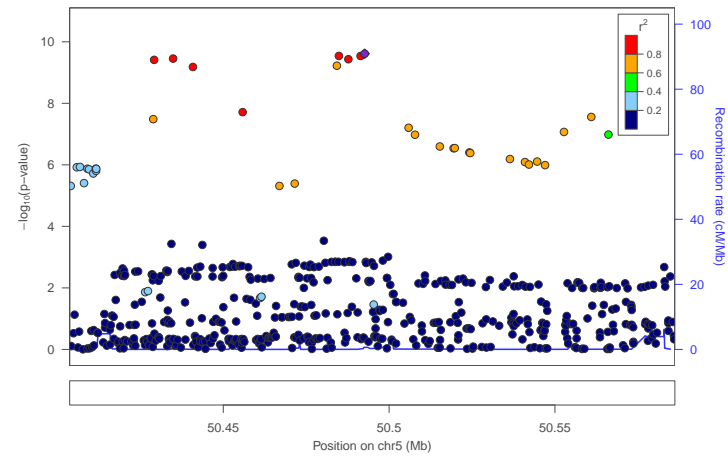

locus\_61

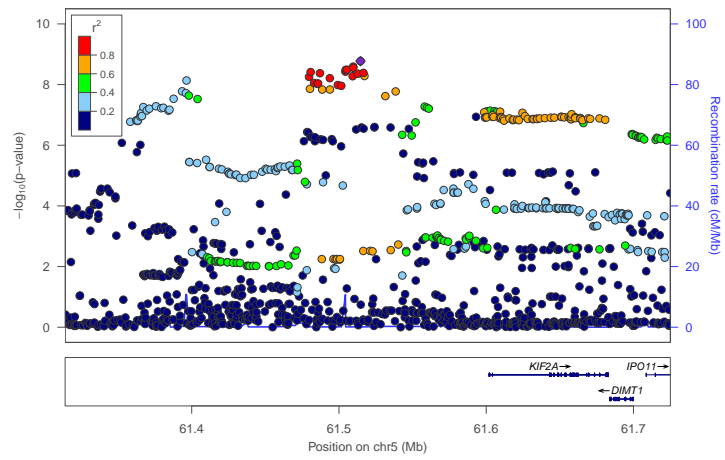

locus\_62

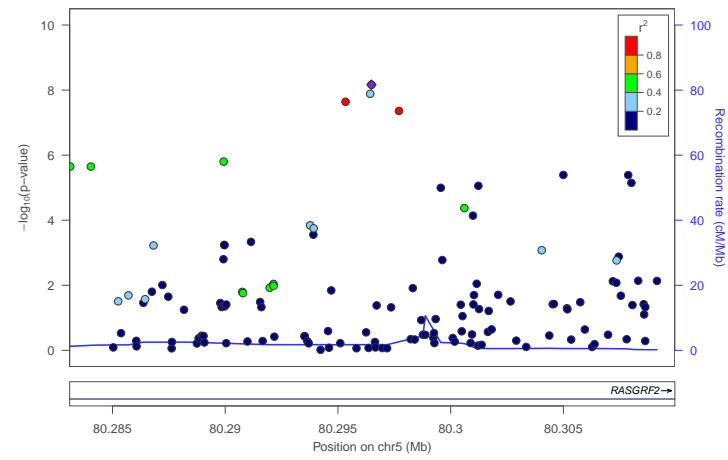

locus\_63

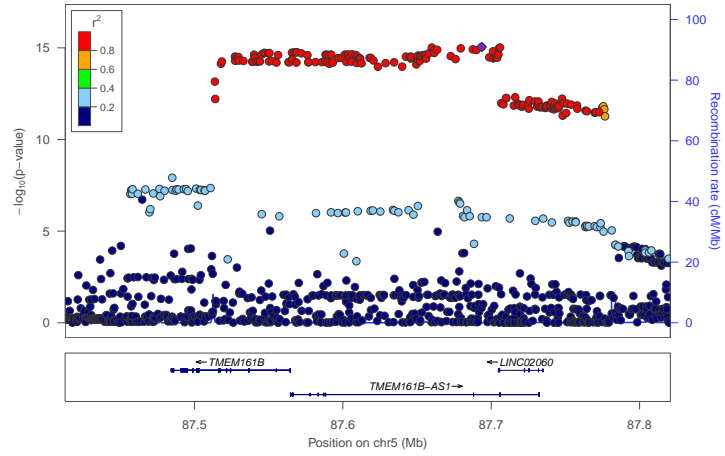

locus\_64

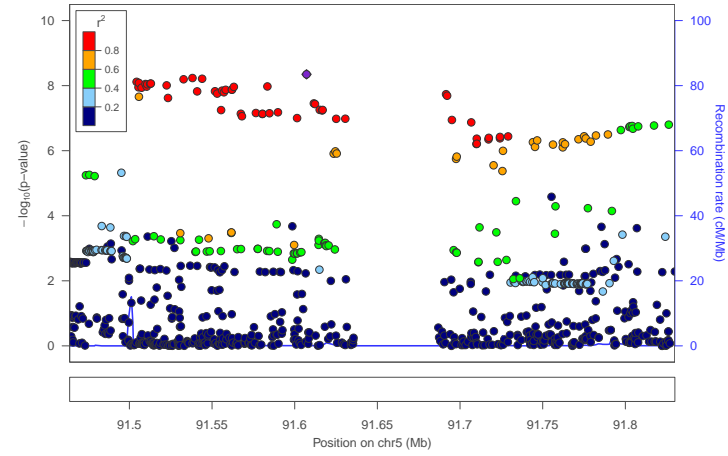

locus\_65

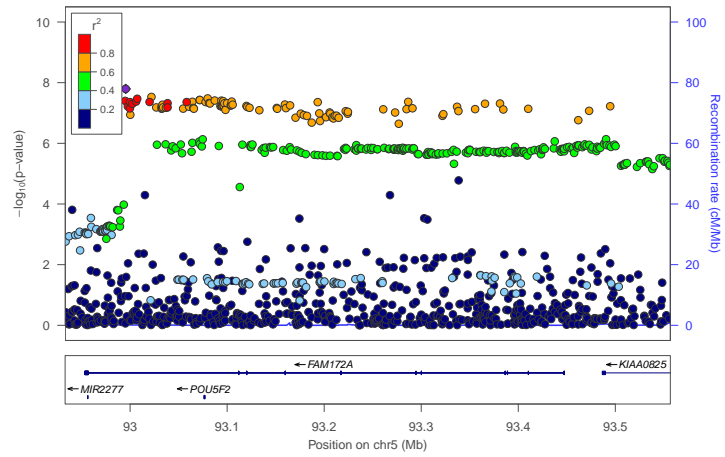

locus\_66

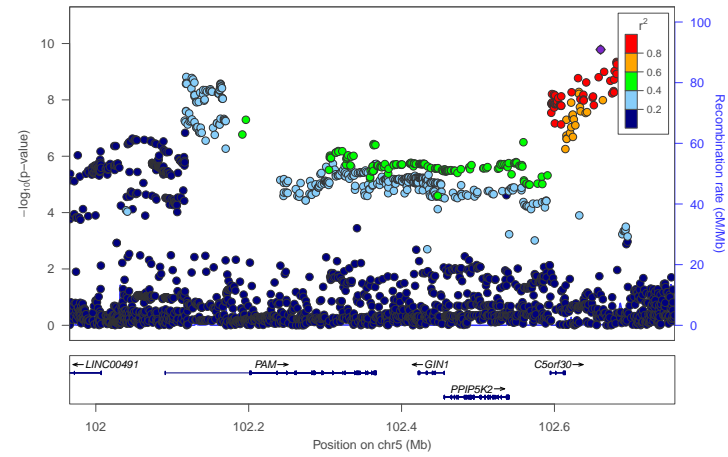

locus\_67

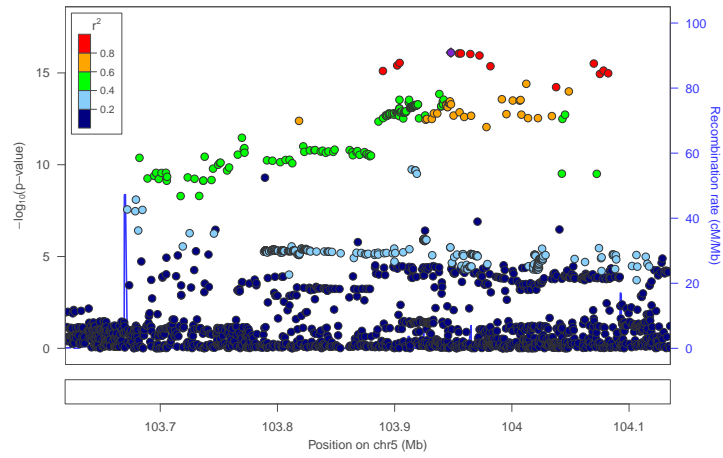

locus\_68

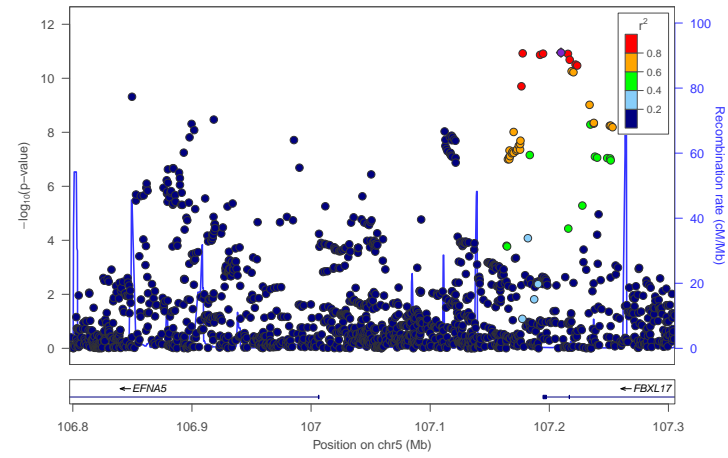

locus\_69

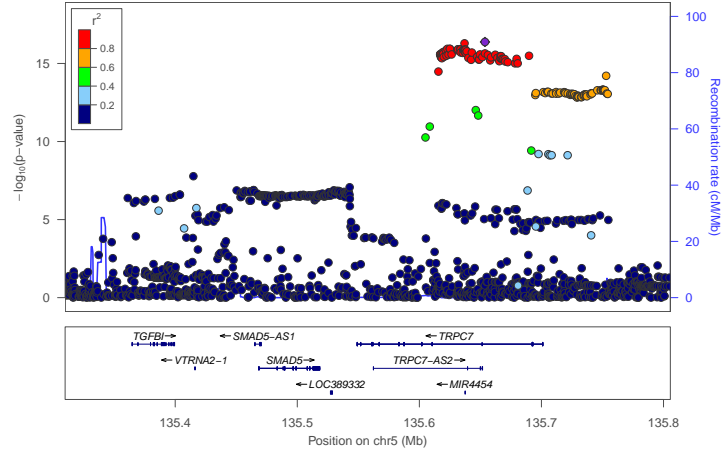

locus\_70

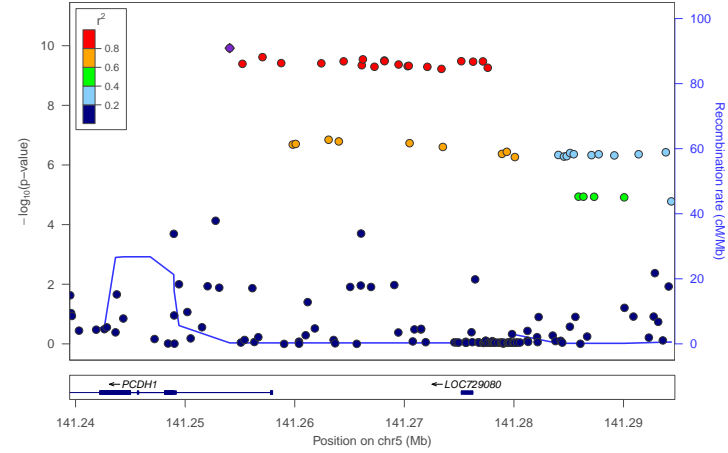

locus\_71

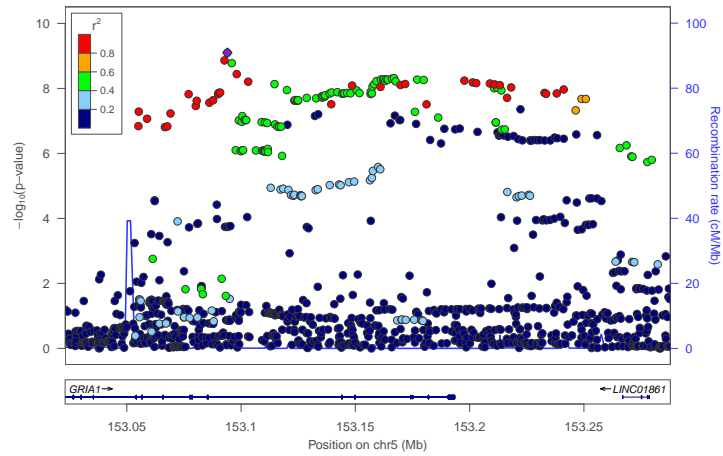

locus\_72

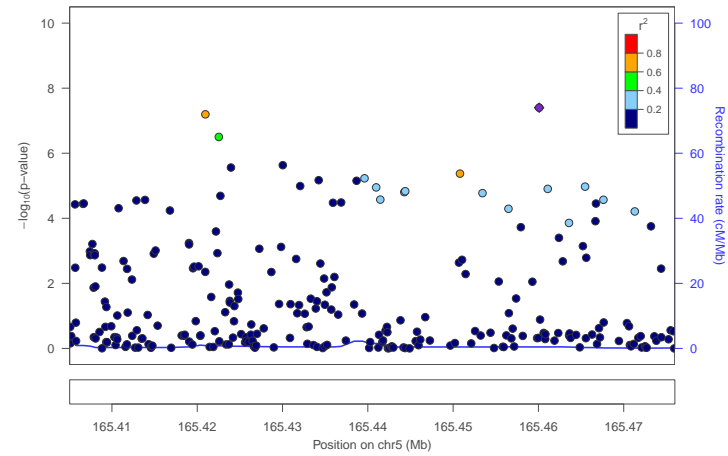



locus\_73

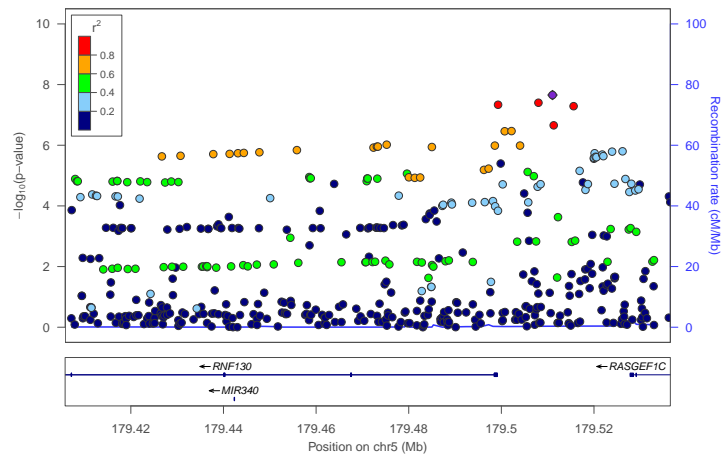

locus\_74

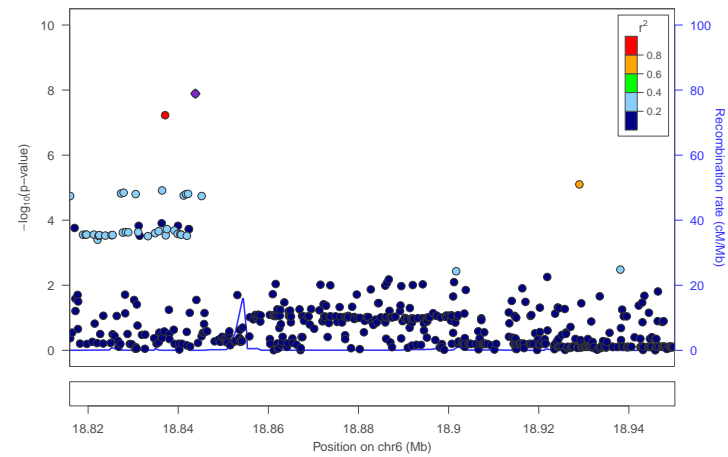

locus\_75

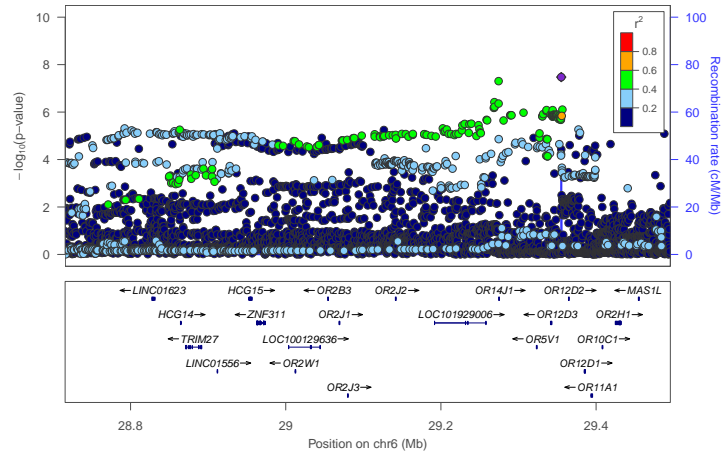

locus\_76

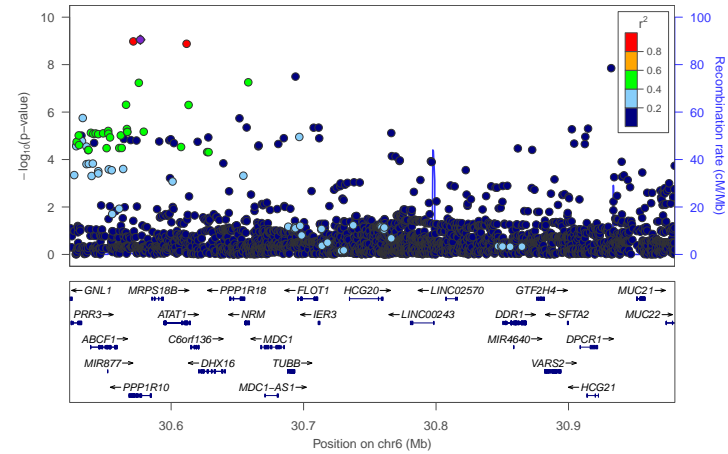

locus\_77

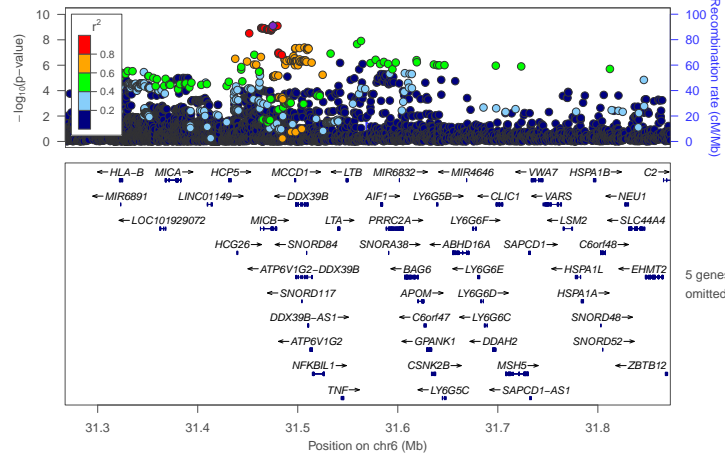

locus\_78

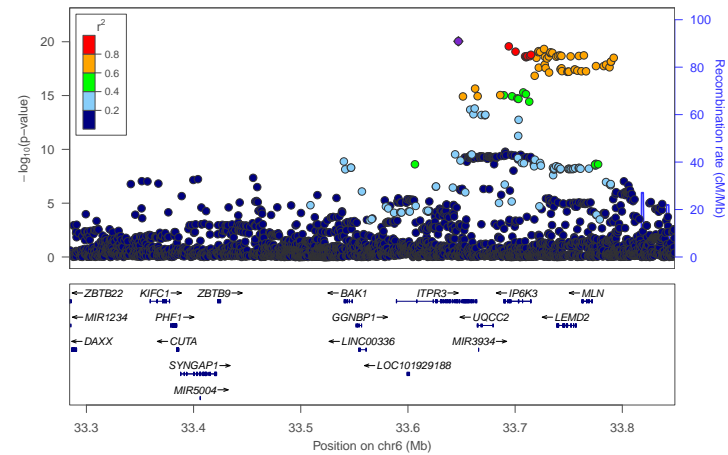

locus\_79

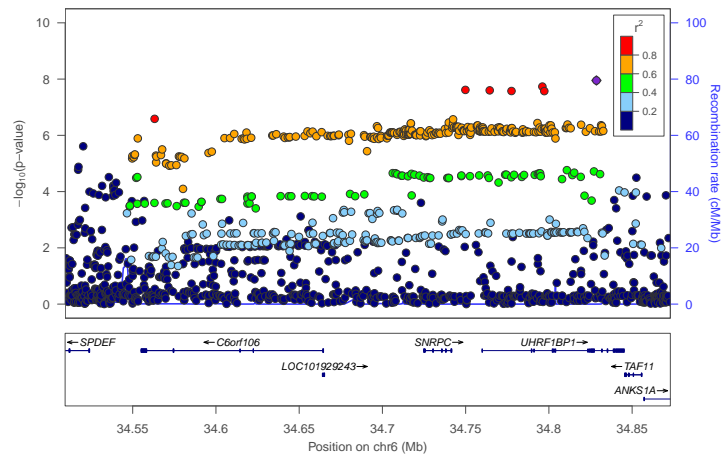

locus\_80

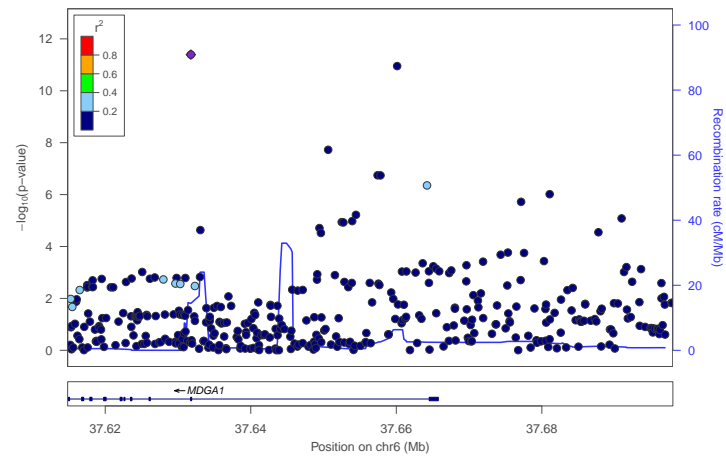

locus\_81

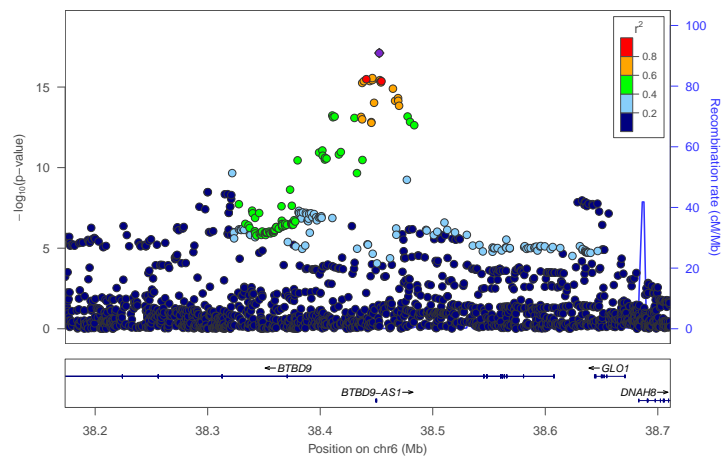

locus\_82

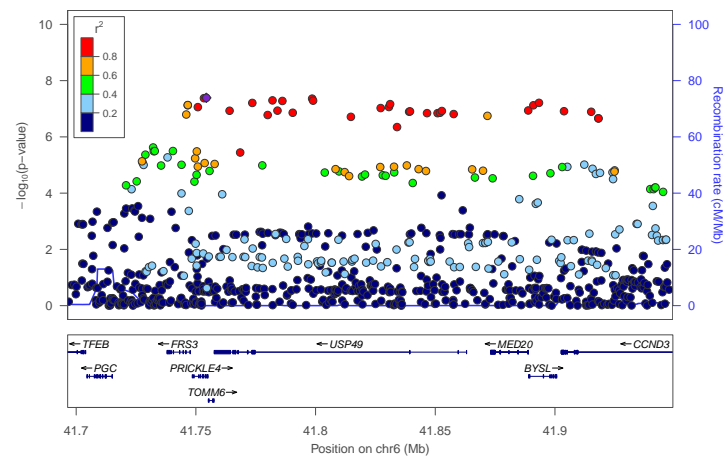

locus\_83

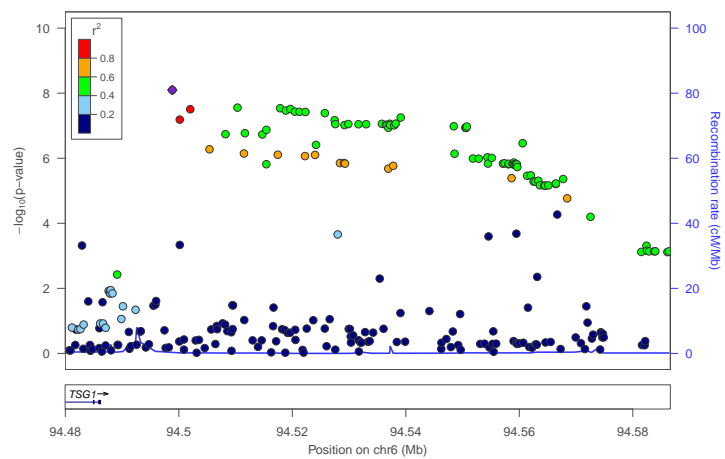

locus\_84

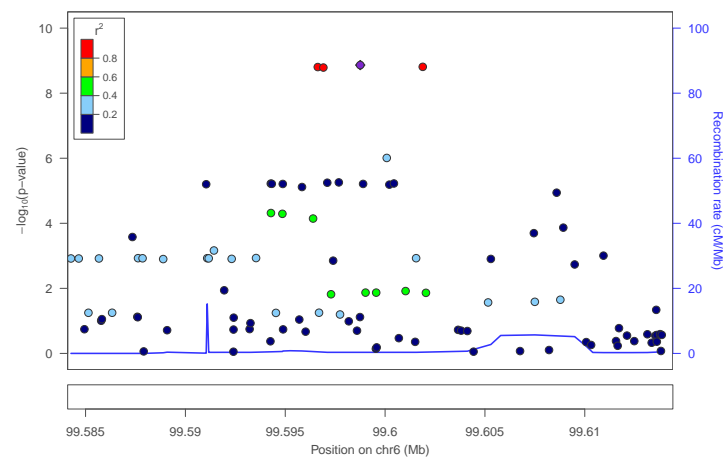



locus\_85

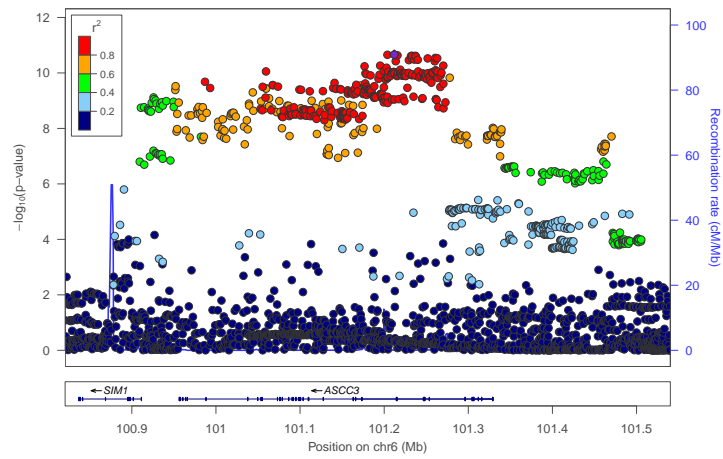

locus\_86

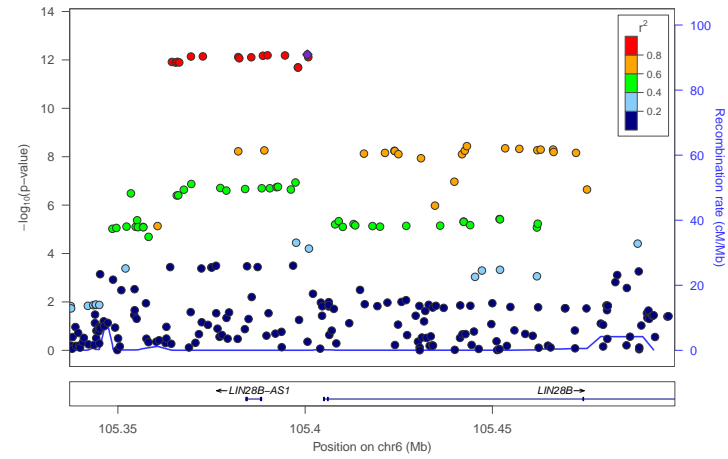

locus\_87

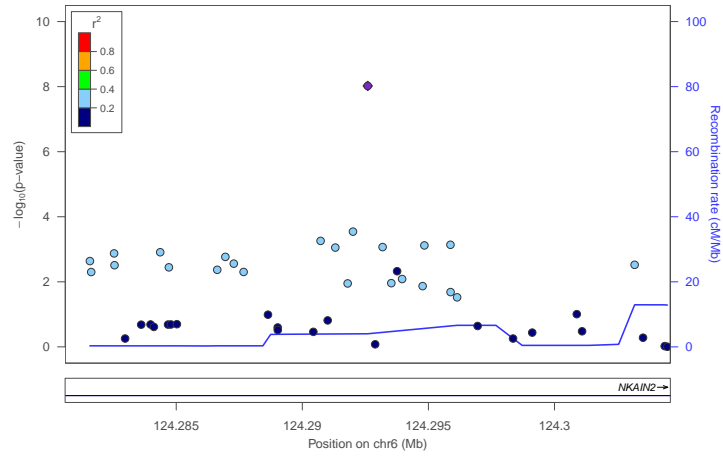

locus\_88

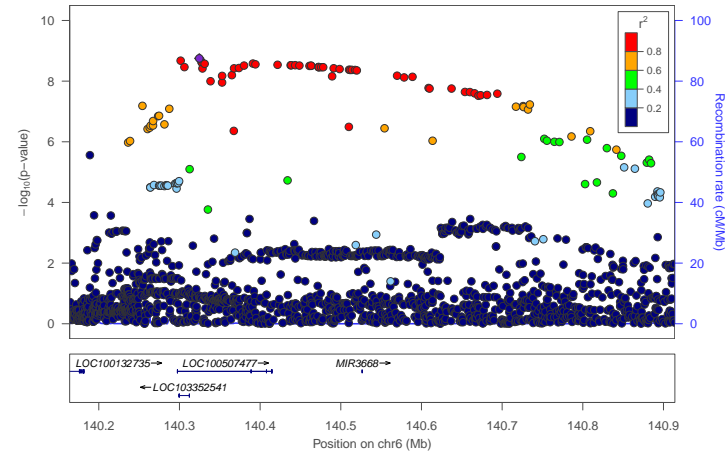

locus\_89

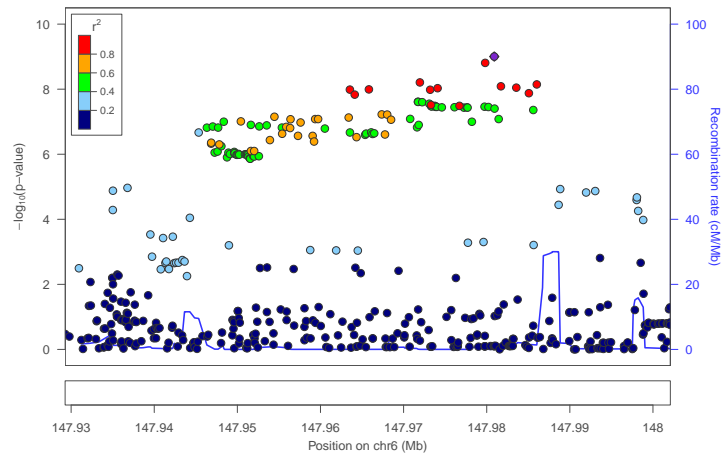

locus\_90

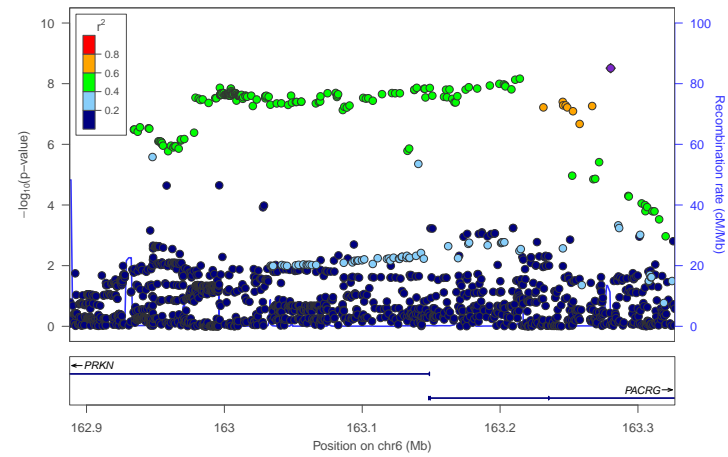

locus\_91

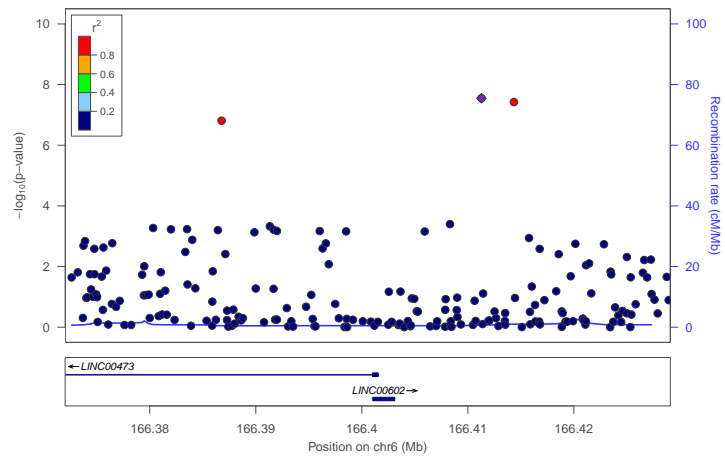

locus\_92

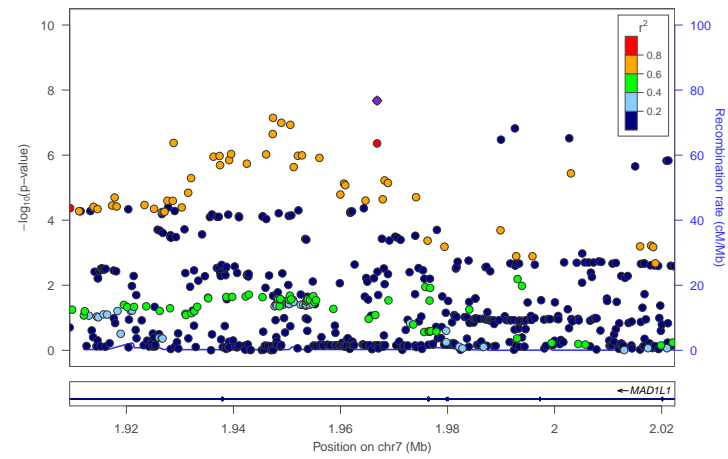

locus\_93

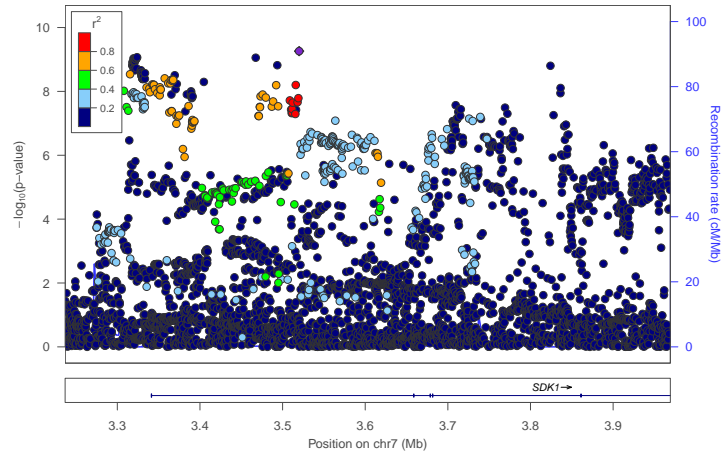

locus\_94

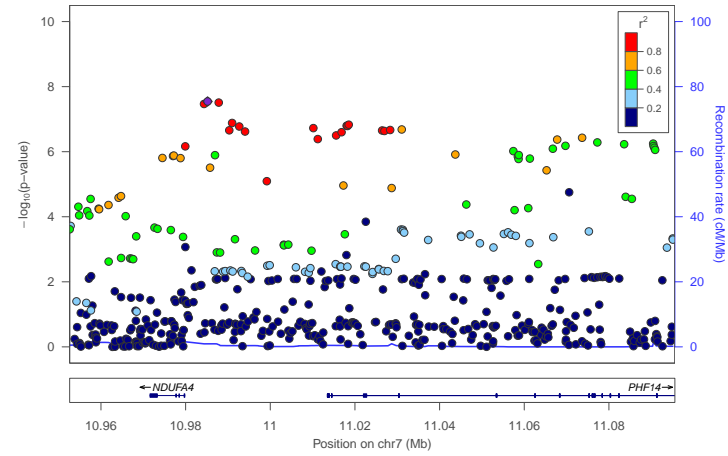

locus\_95

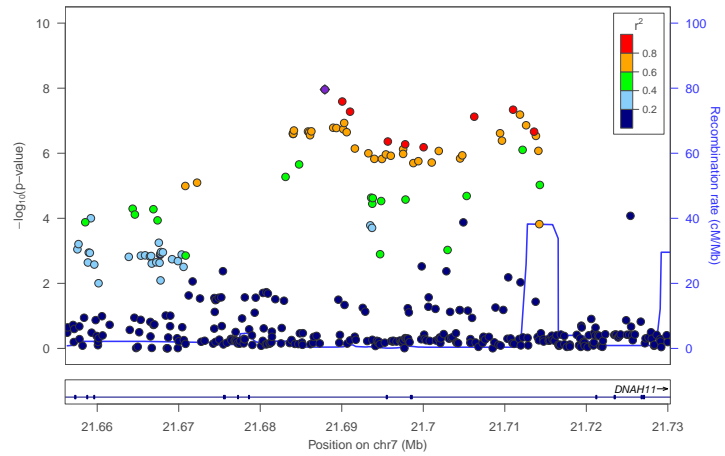

locus\_96

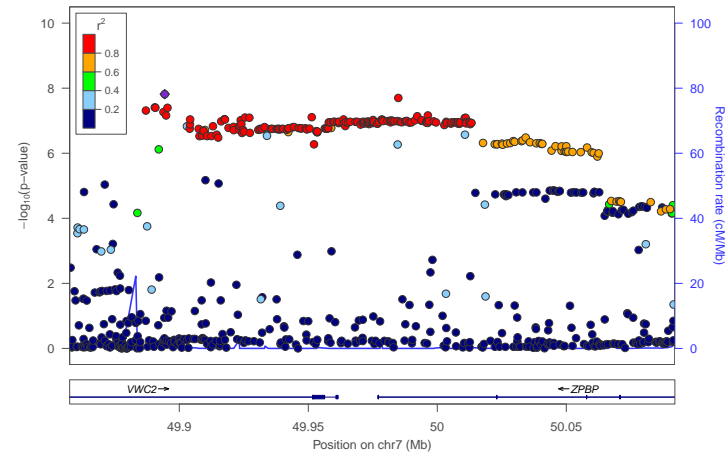

locus\_97

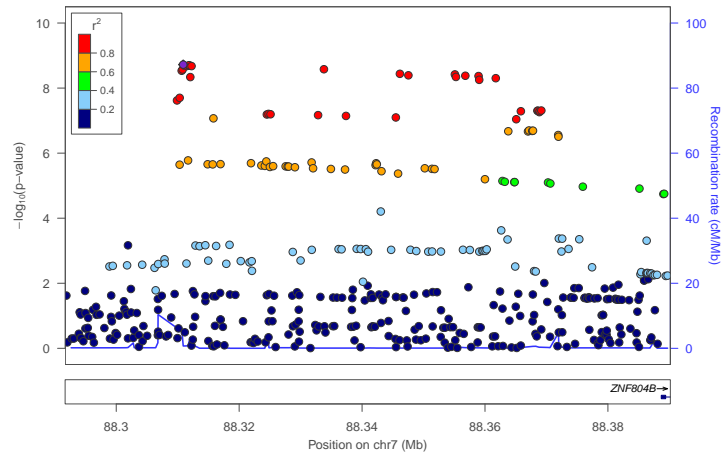

locus\_98

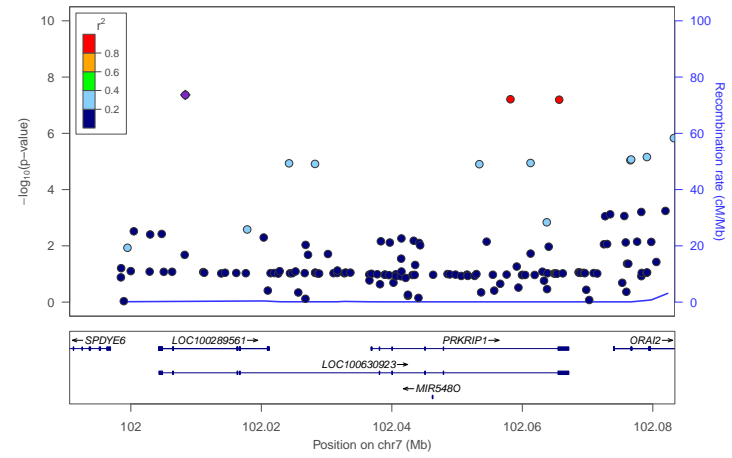

locus\_99

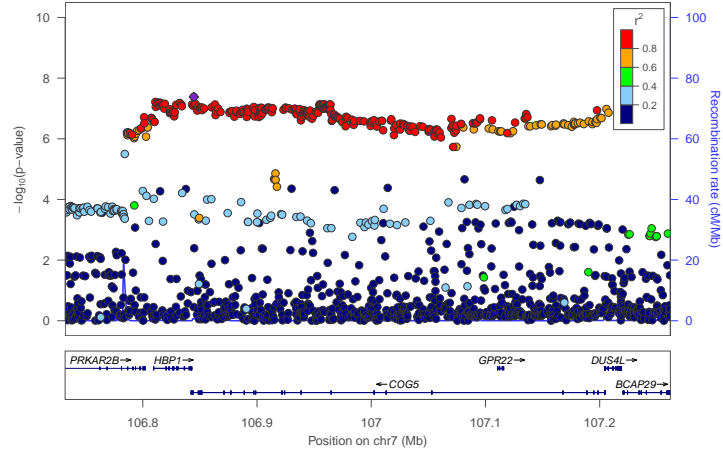

locus\_100

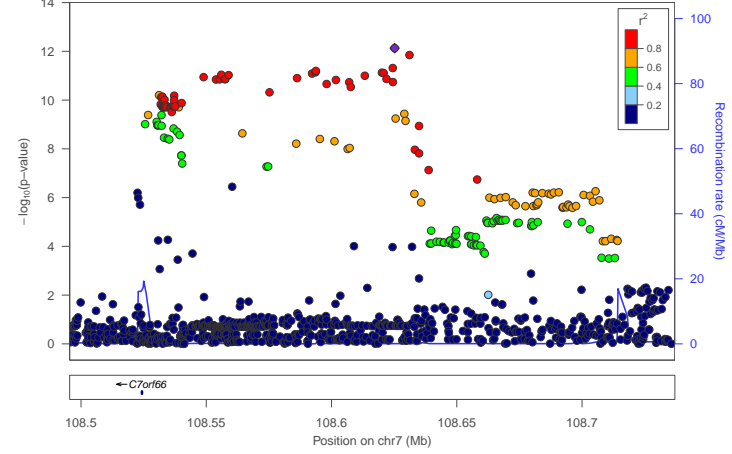

locus\_101

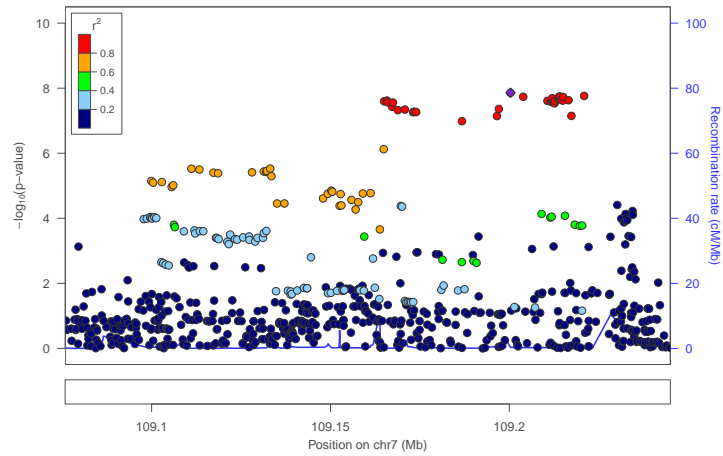

locus\_102

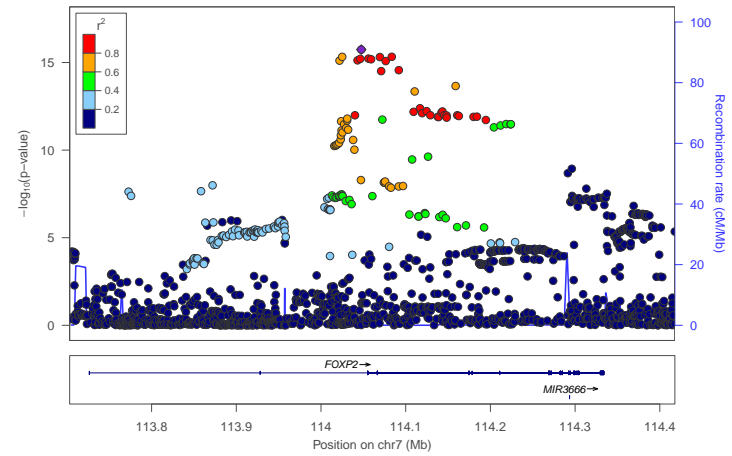

locus\_103

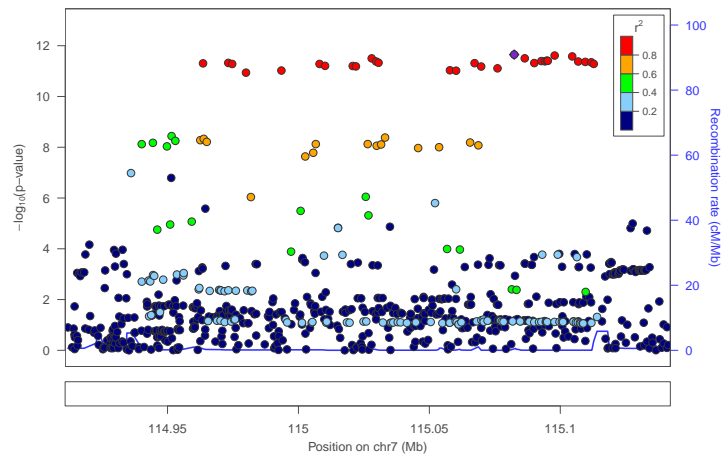

locus\_104

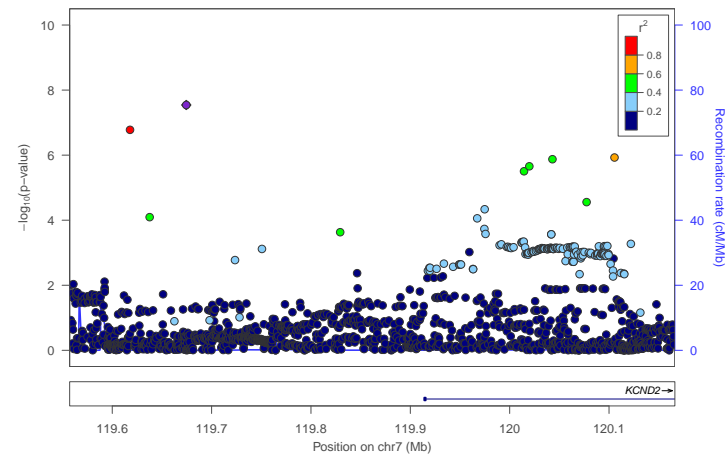

locus\_105

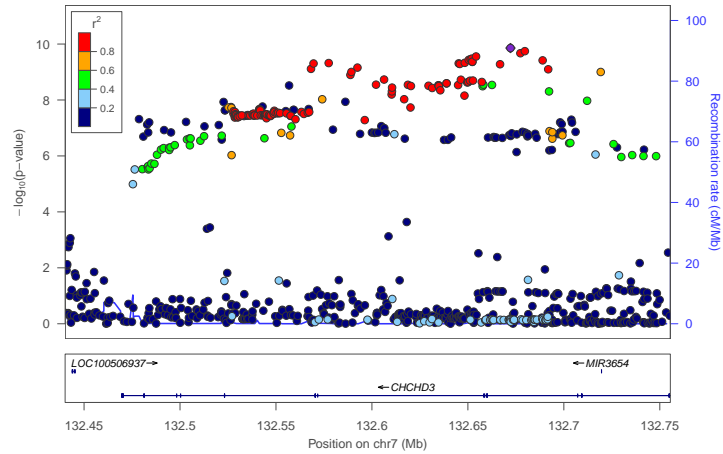

locus\_106

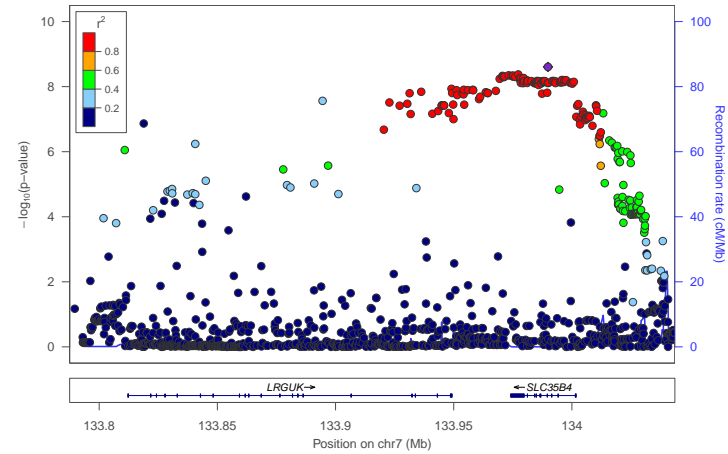

locus\_107

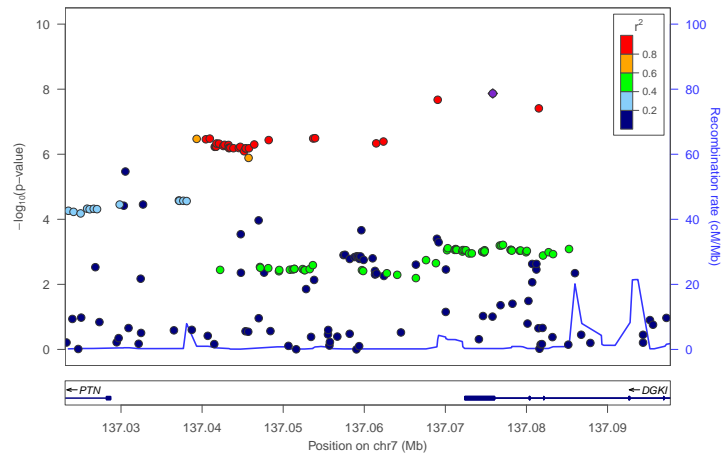

locus\_108

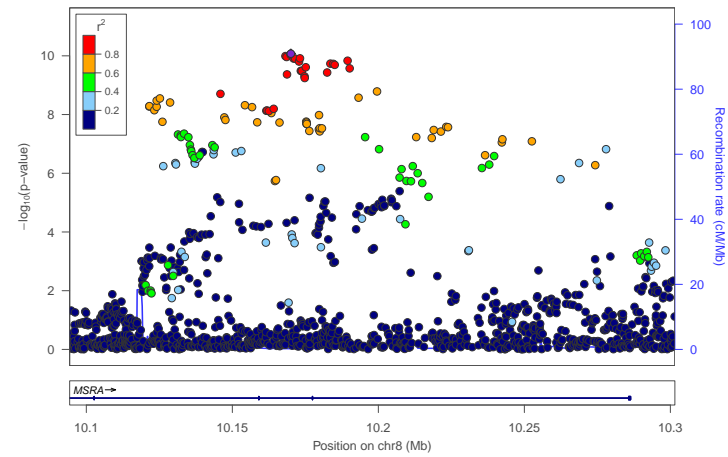

locus\_109

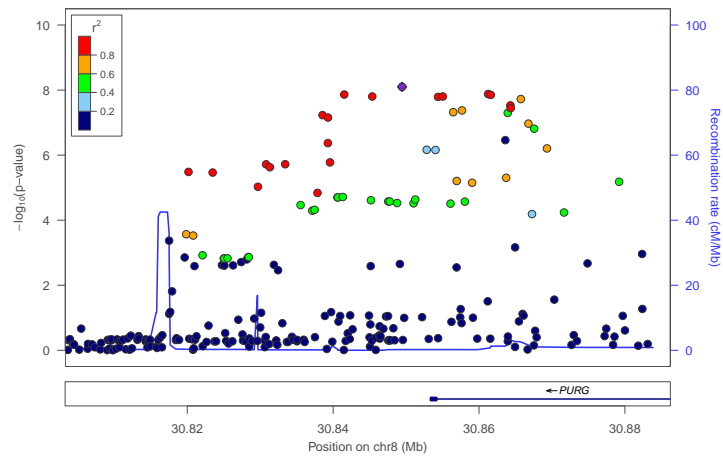

locus\_110

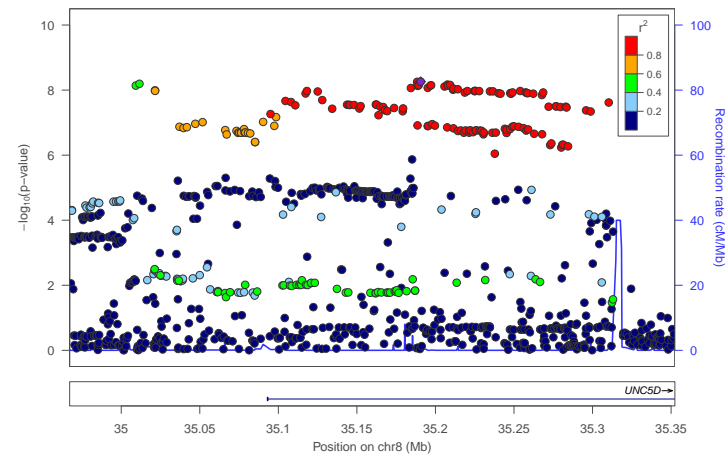

locus\_111

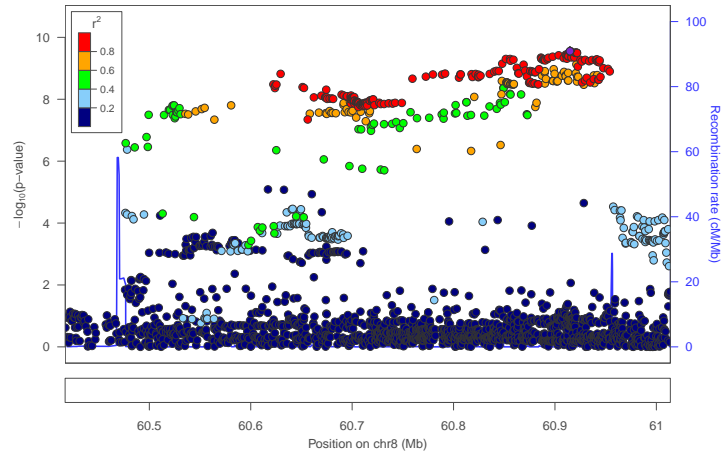

locus\_112

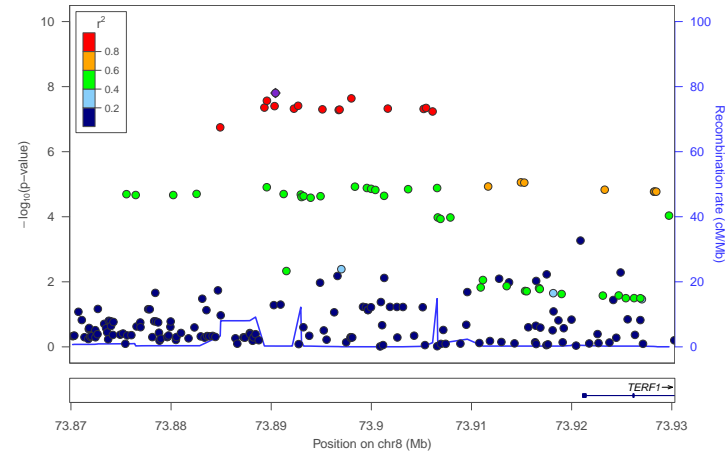

locus\_113

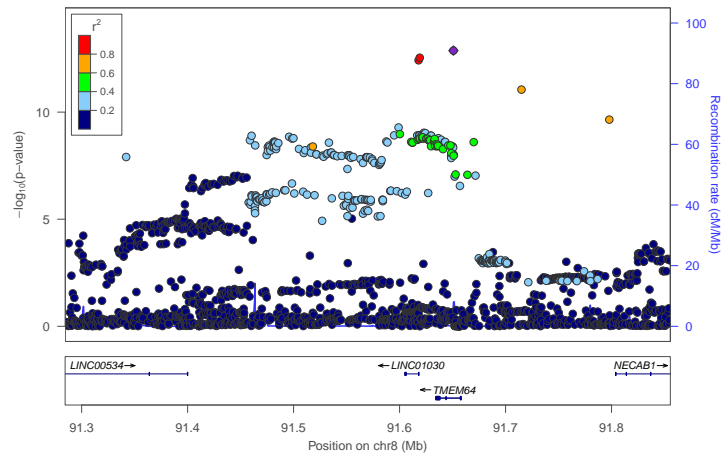

locus\_114

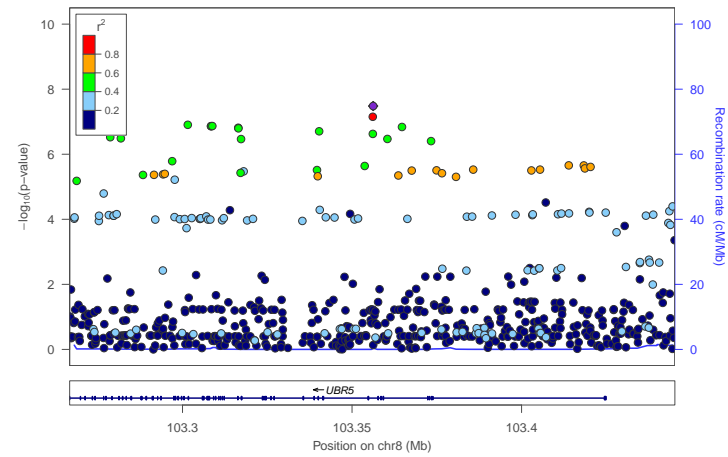

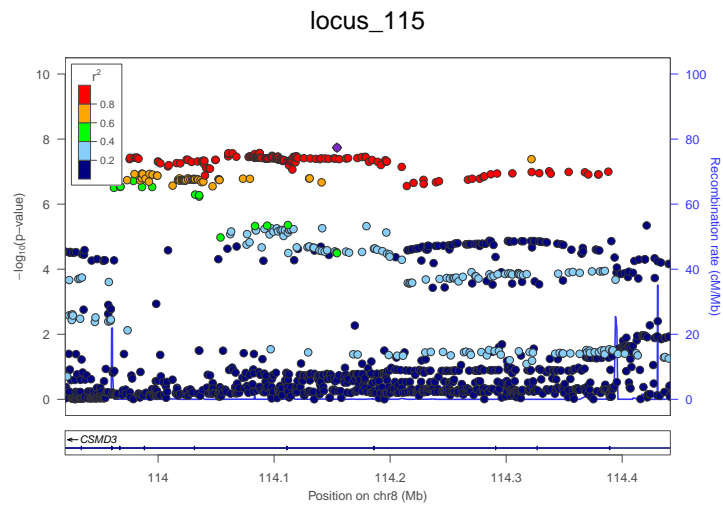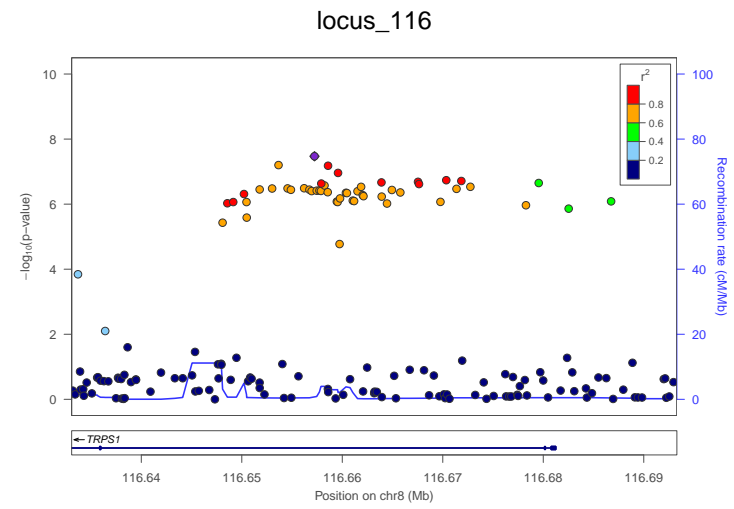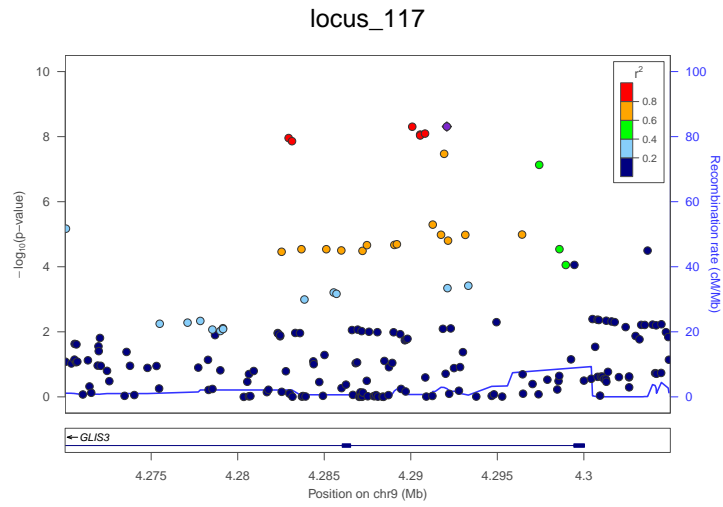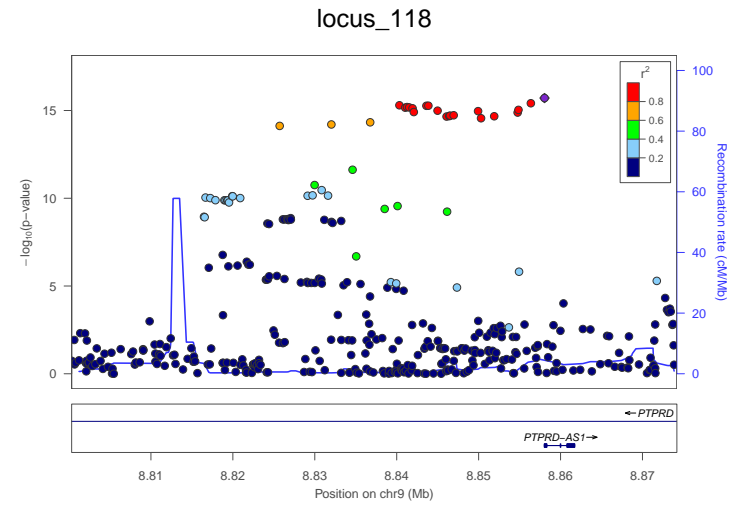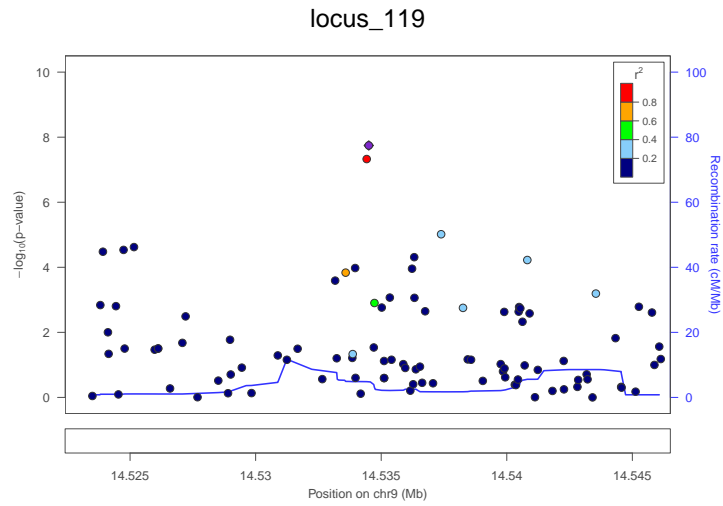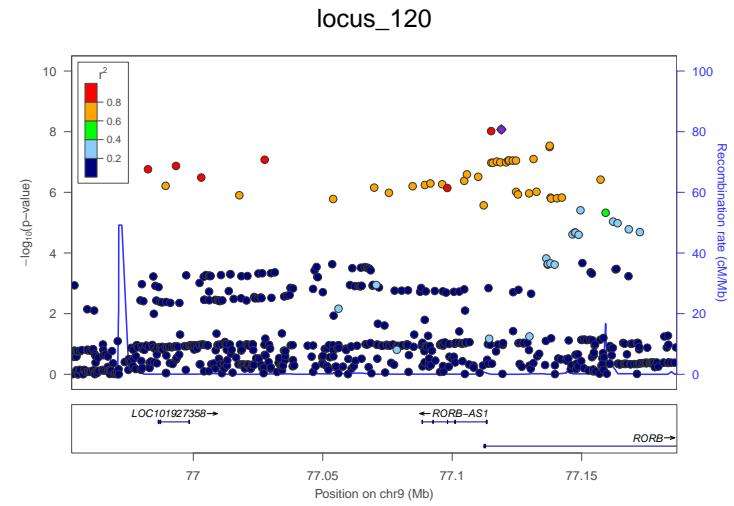



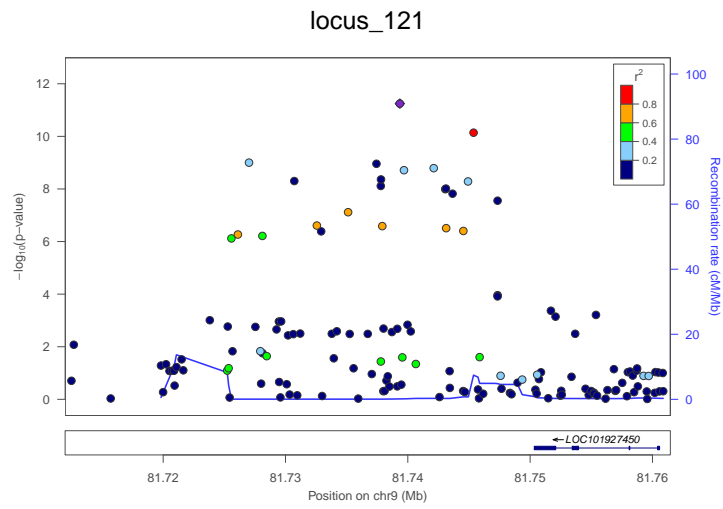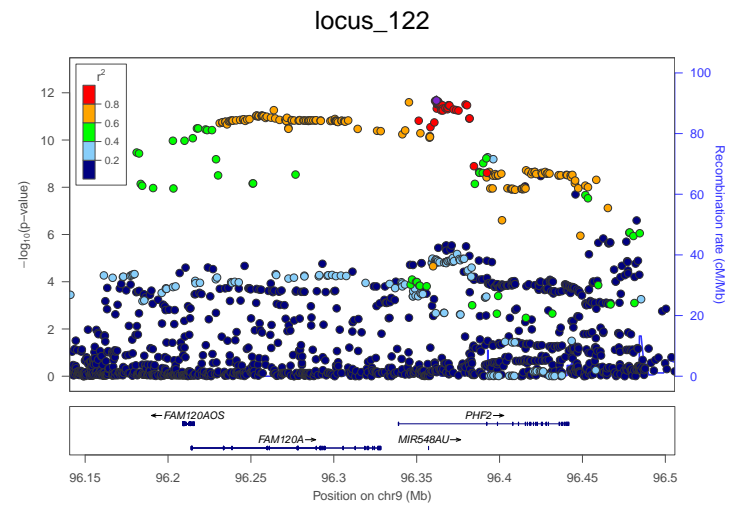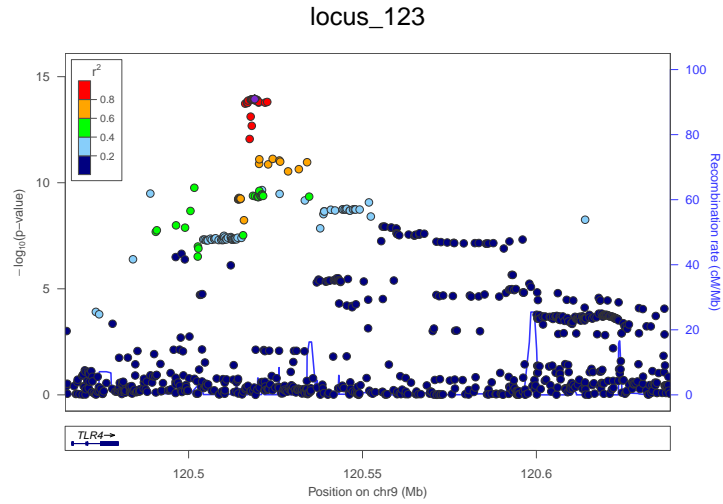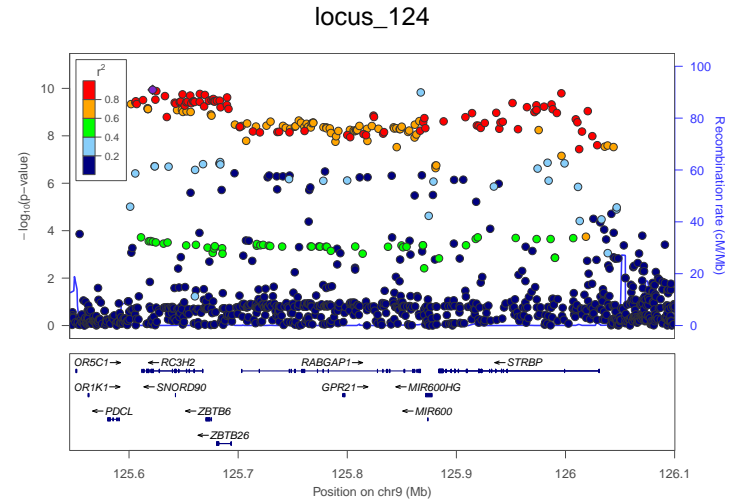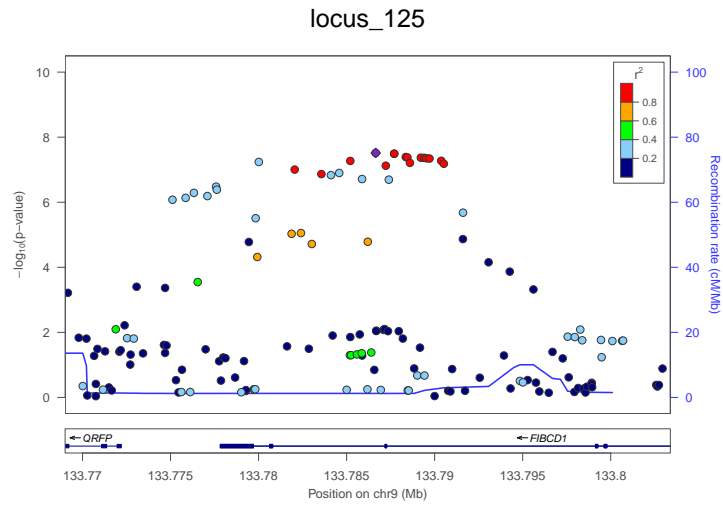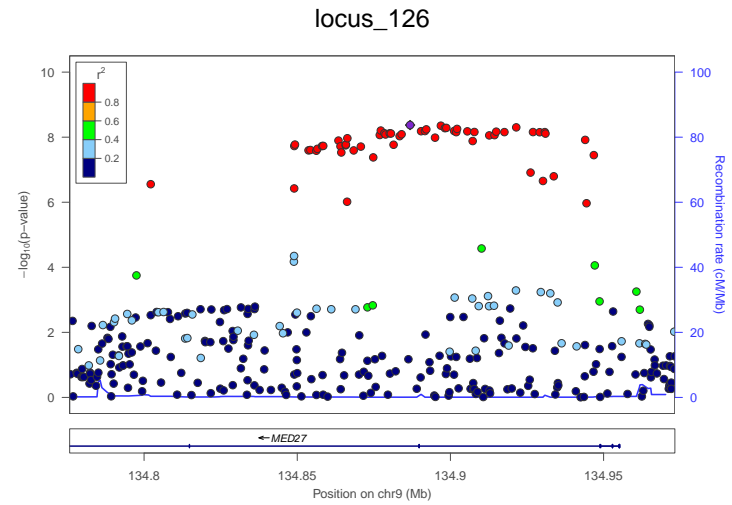

locus\_127

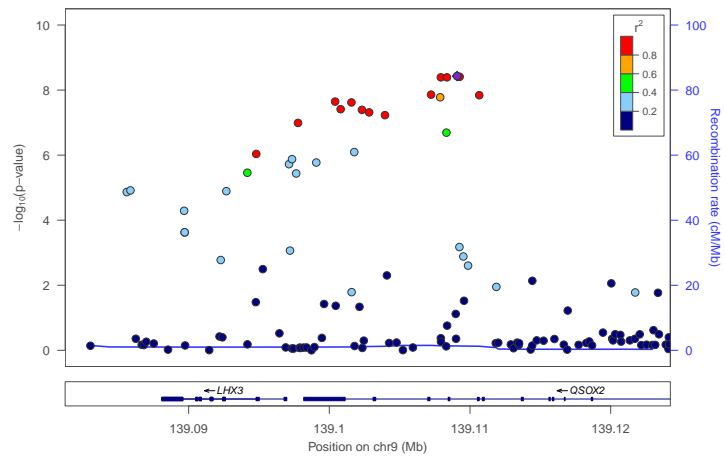

locus\_128

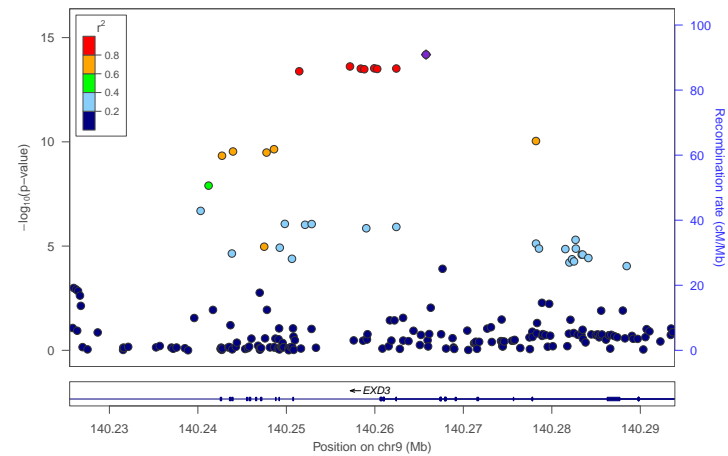

locus\_129

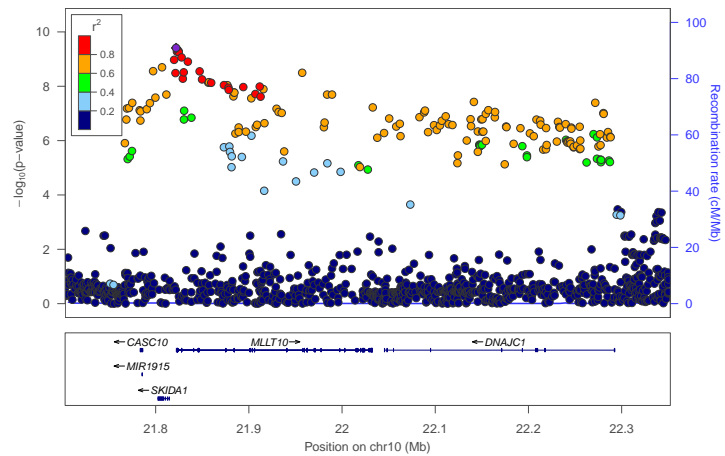

locus\_130

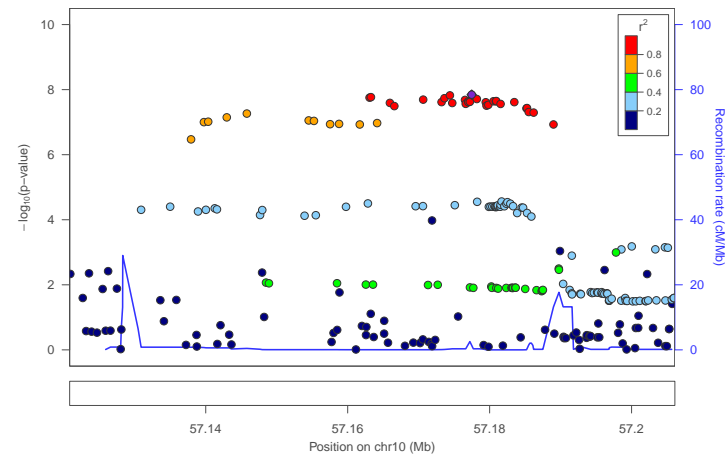

locus\_131

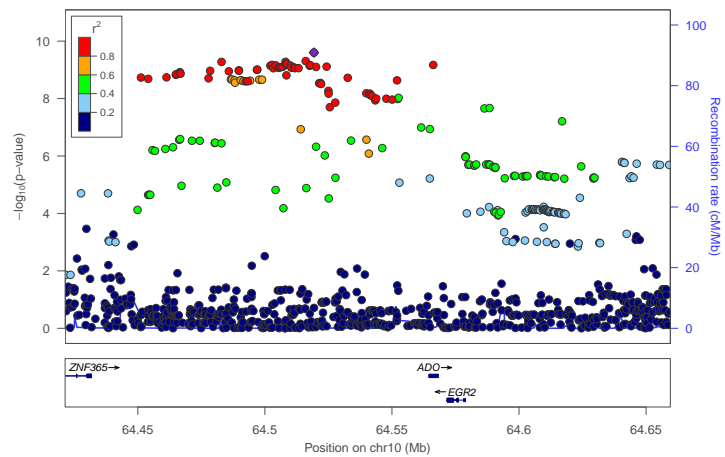

locus\_132

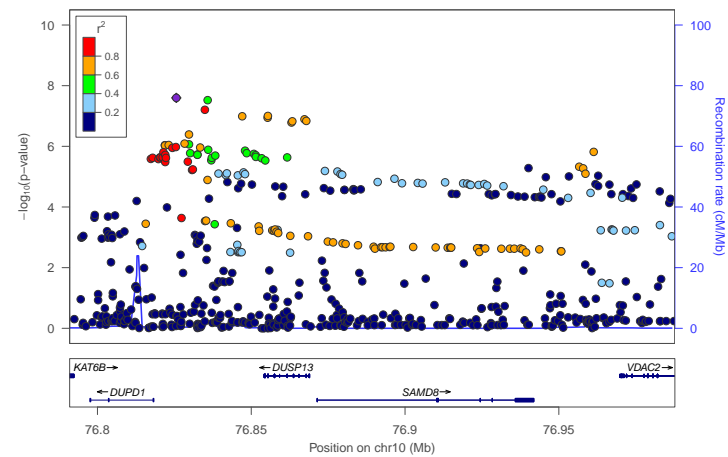



locus\_133

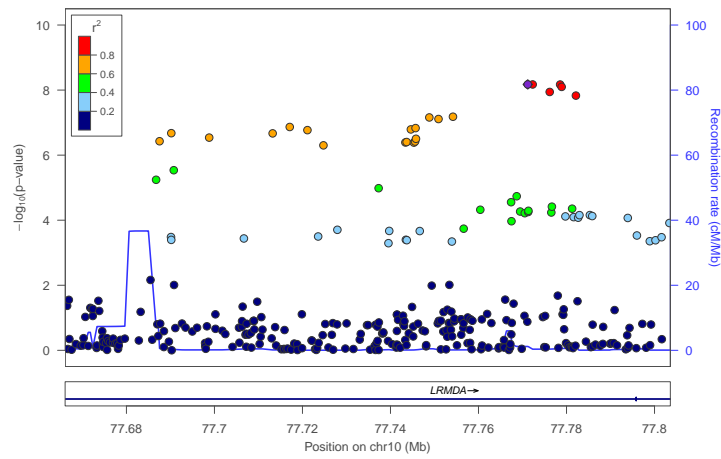

locus\_134

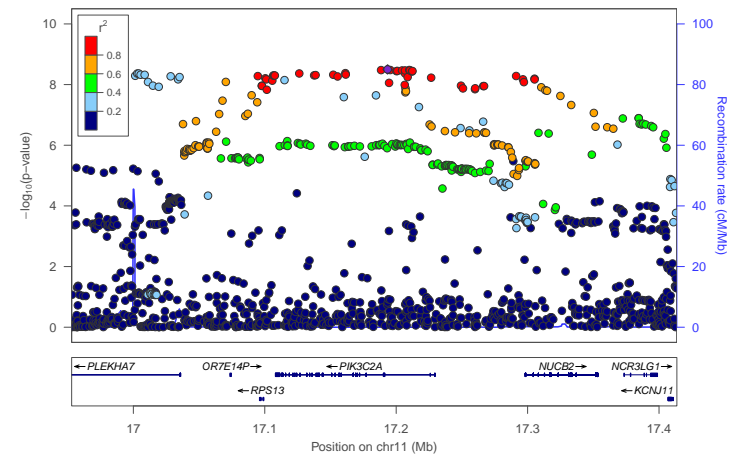

locus\_135

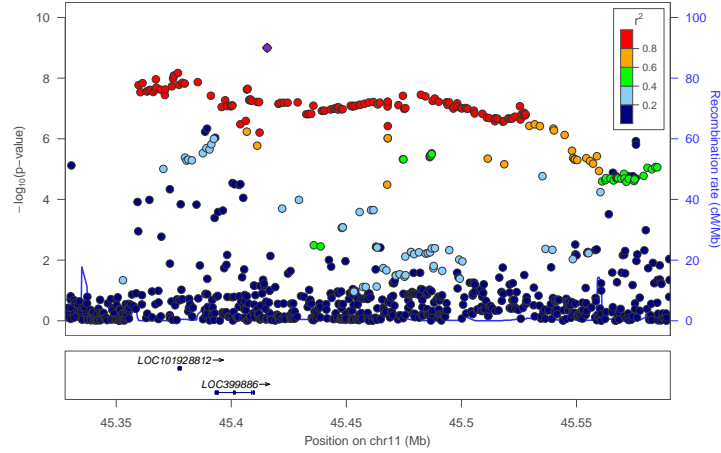

locus\_136

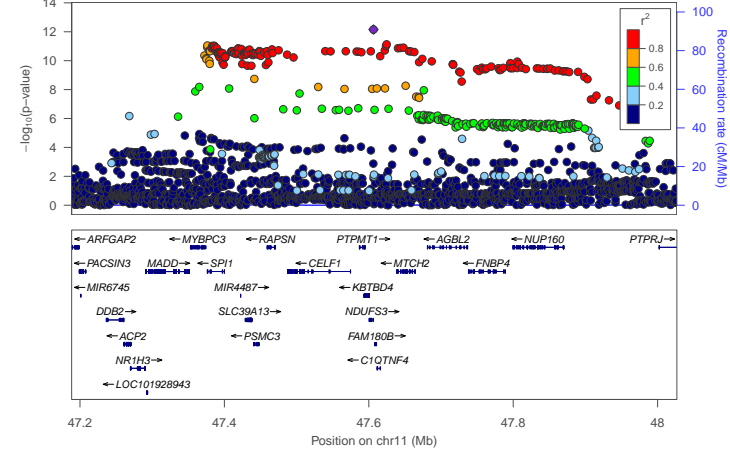

locus\_137

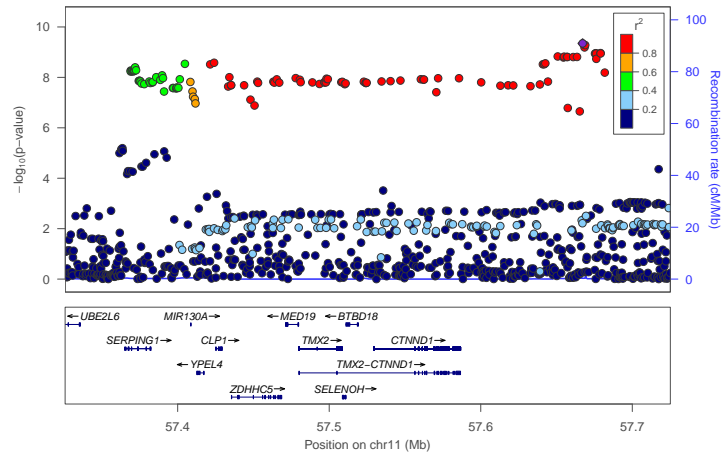

locus\_138

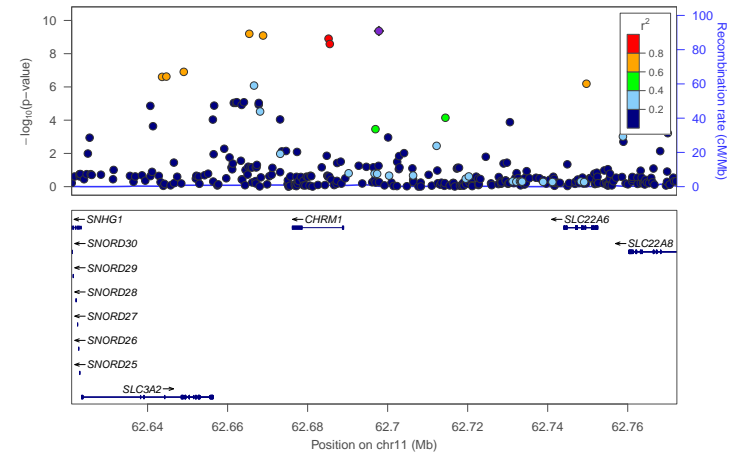

locus\_139

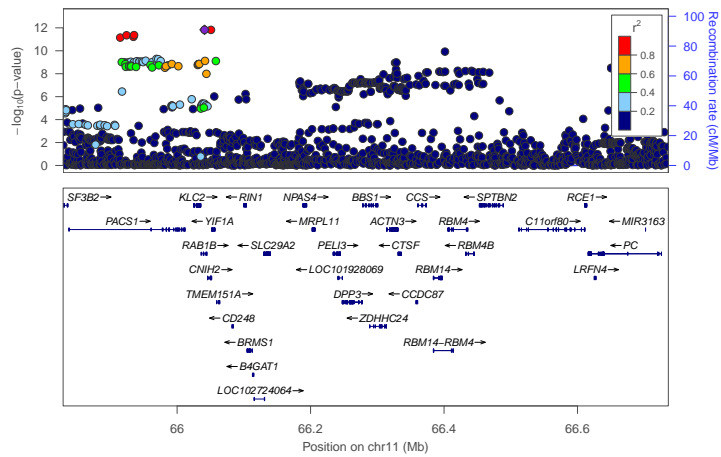

locus\_140

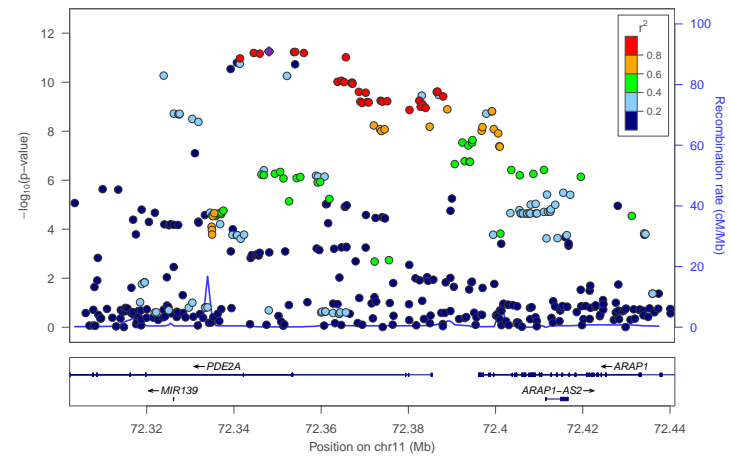

locus\_141

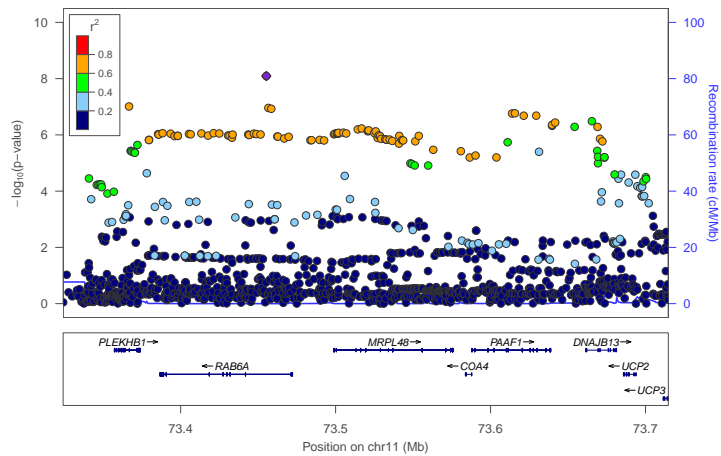

locus\_142

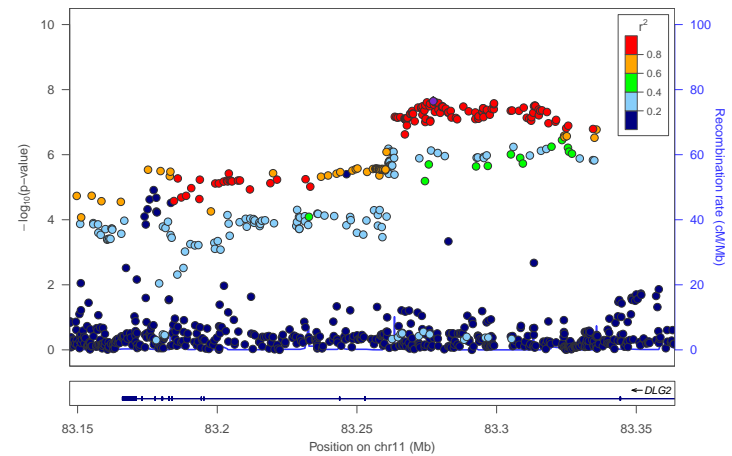

locus\_143

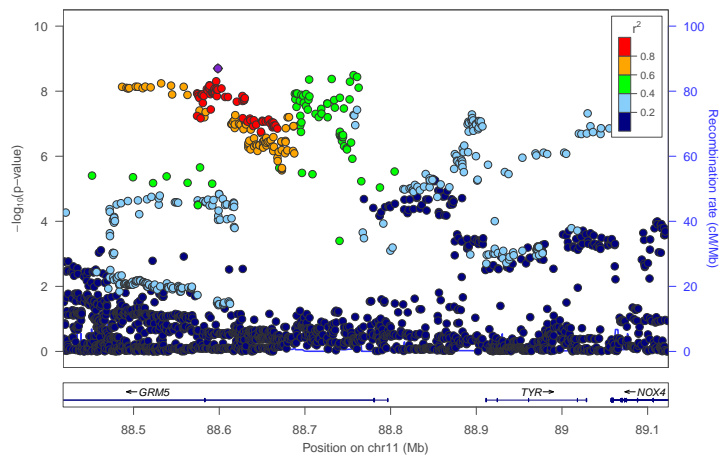

locus\_144

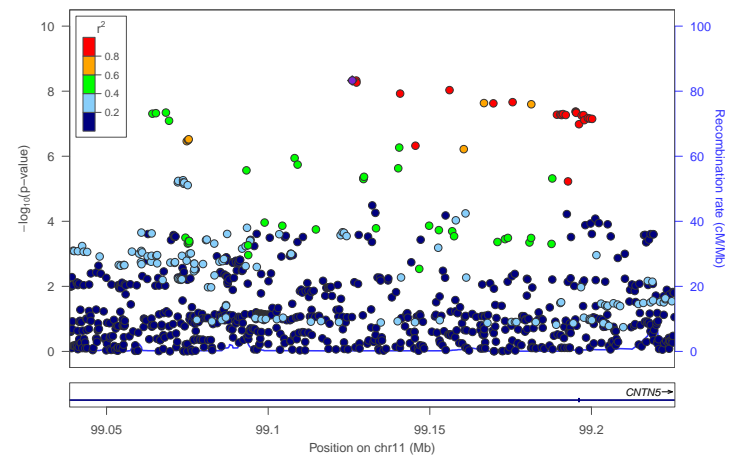

locus\_145

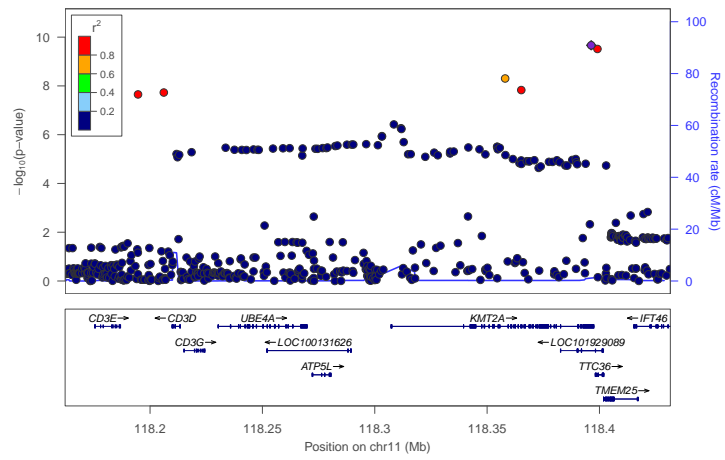

locus\_146

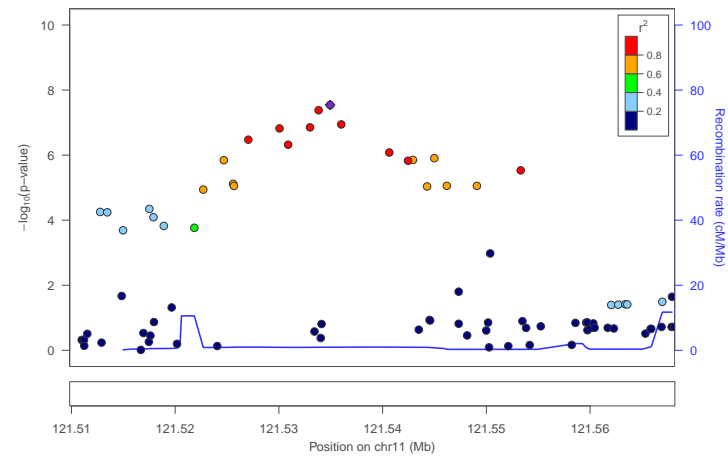

locus\_147

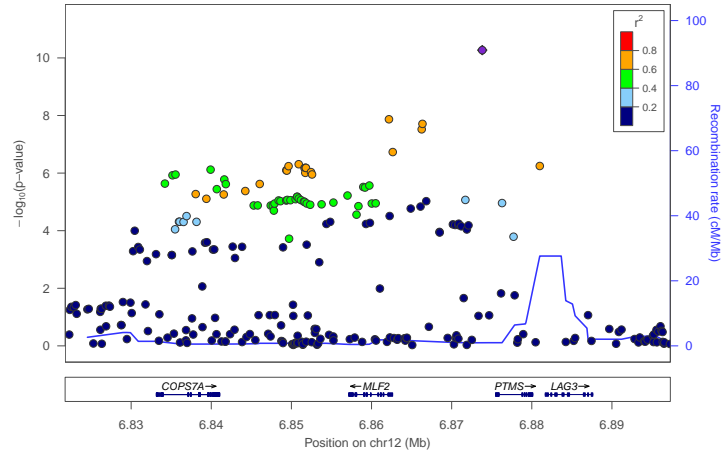

locus\_148

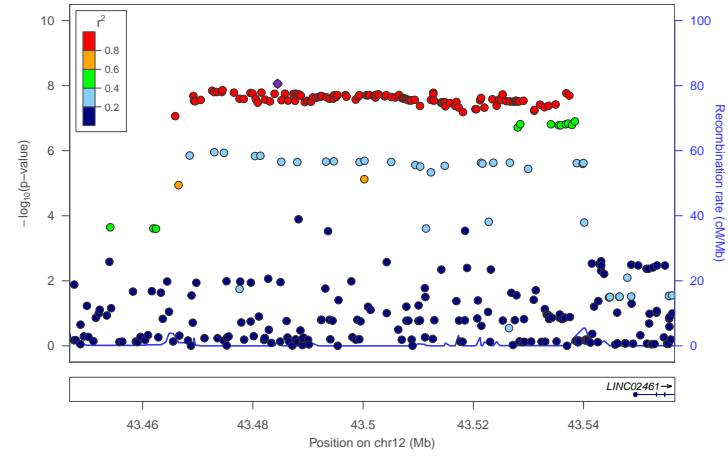

locus\_149

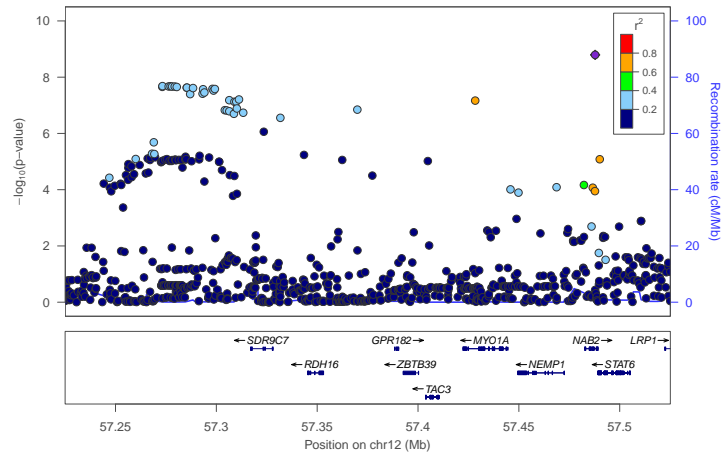

locus\_150

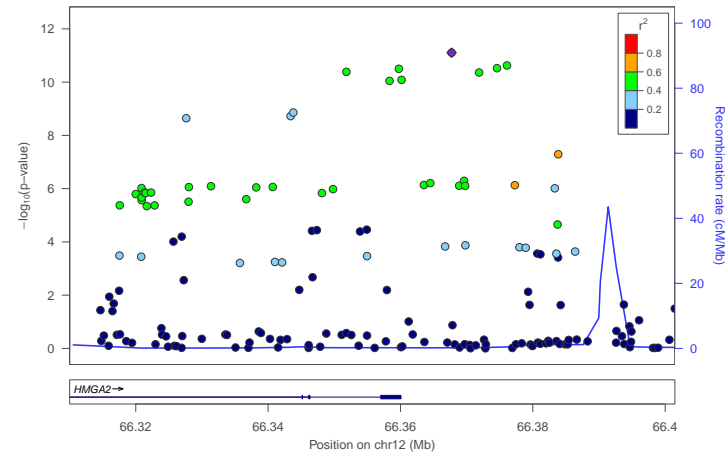

locus\_151

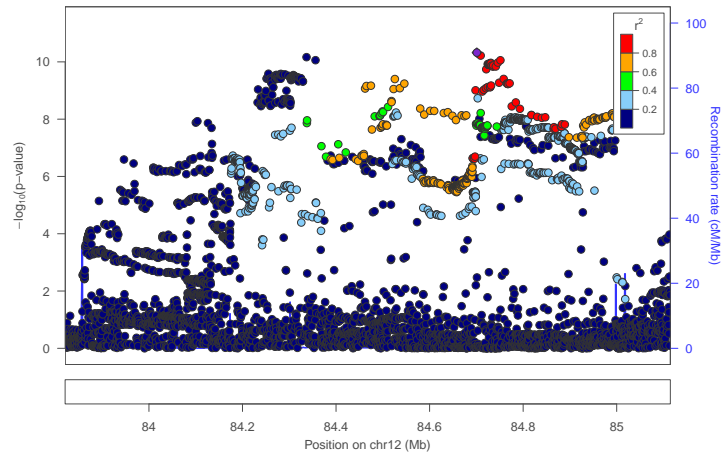

locus\_152

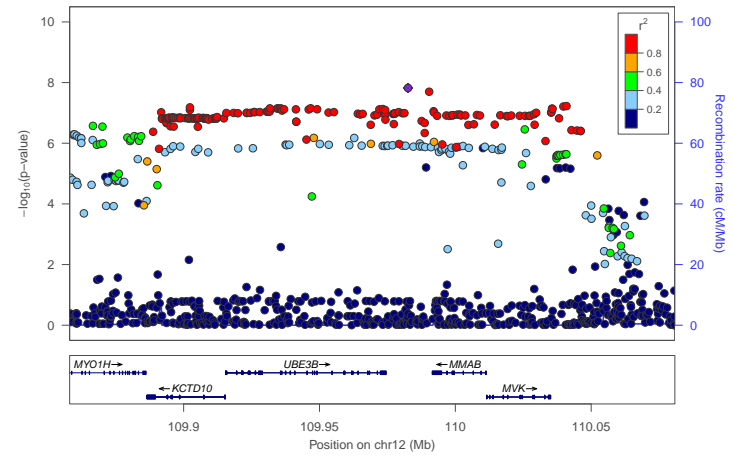

locus\_153

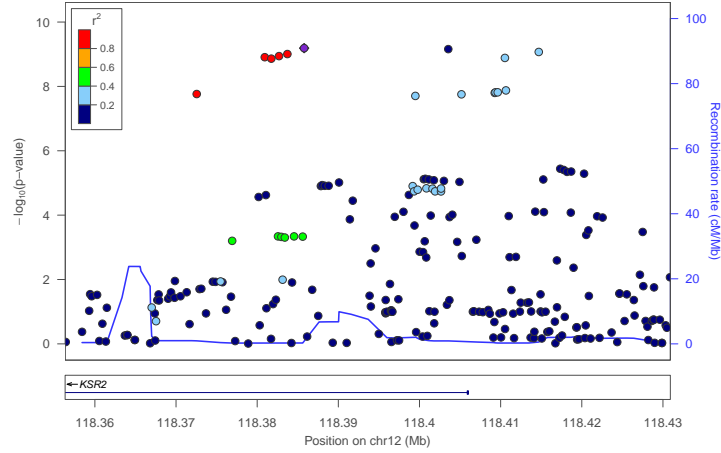

locus\_154

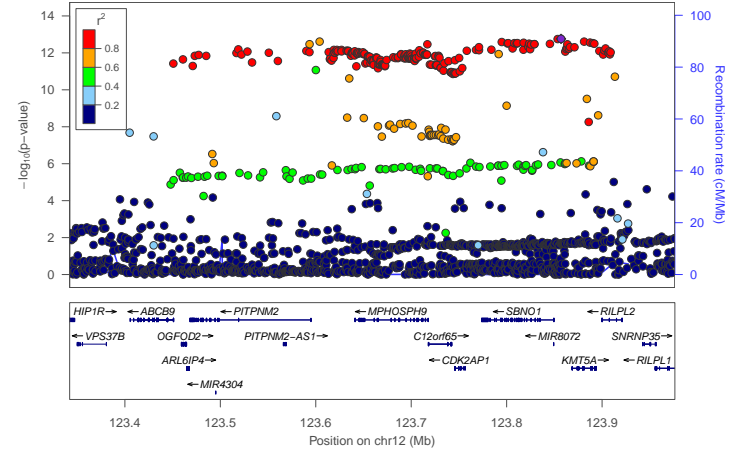

locus\_155

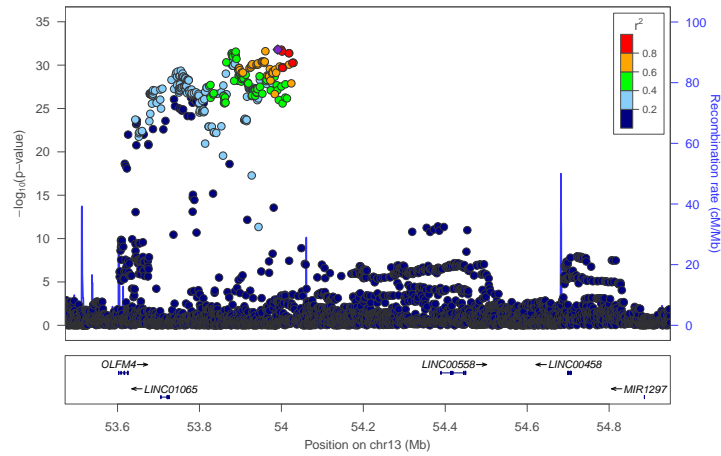

locus\_156

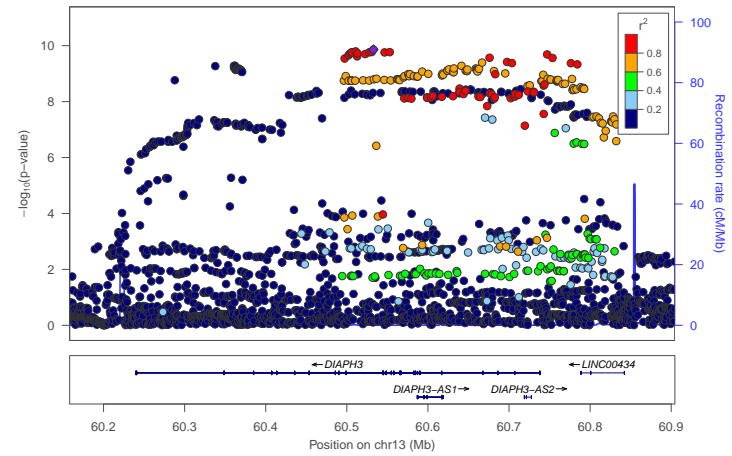

locus\_157

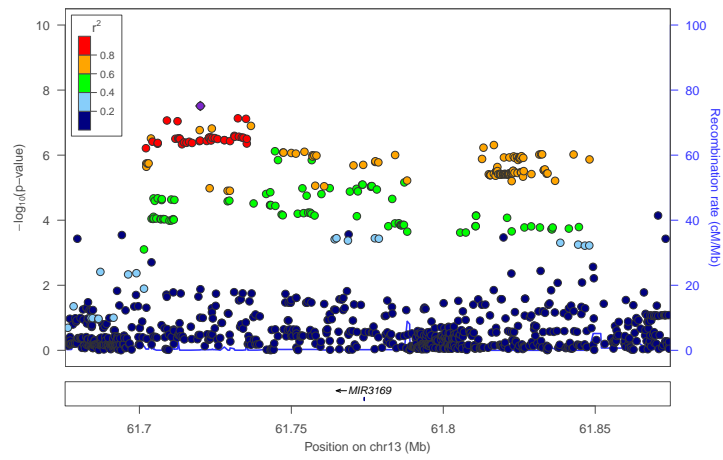

locus\_158

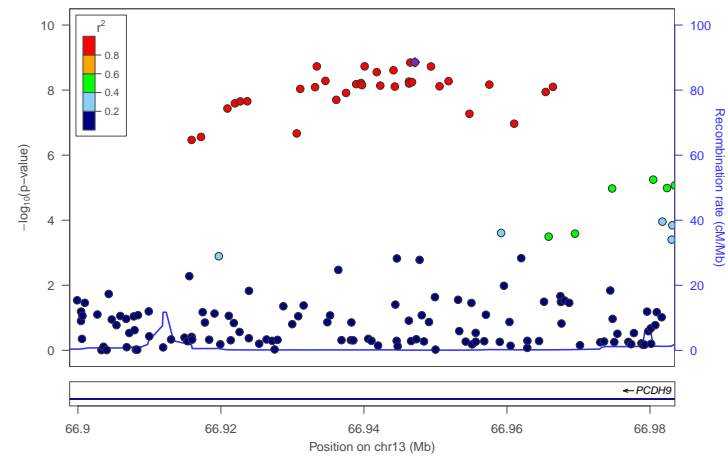

locus\_159

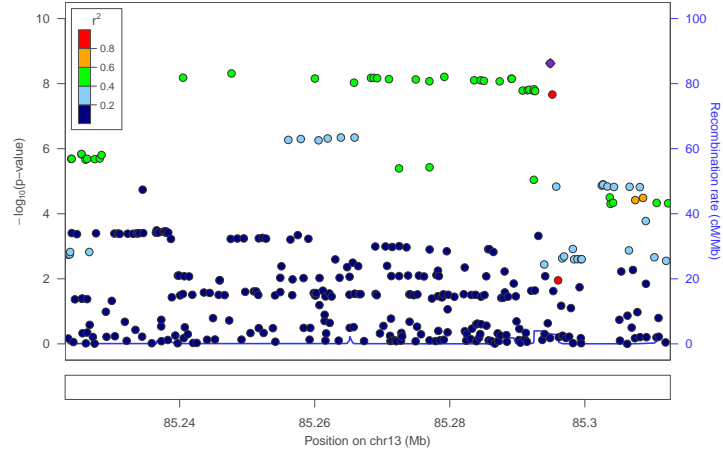

locus\_160

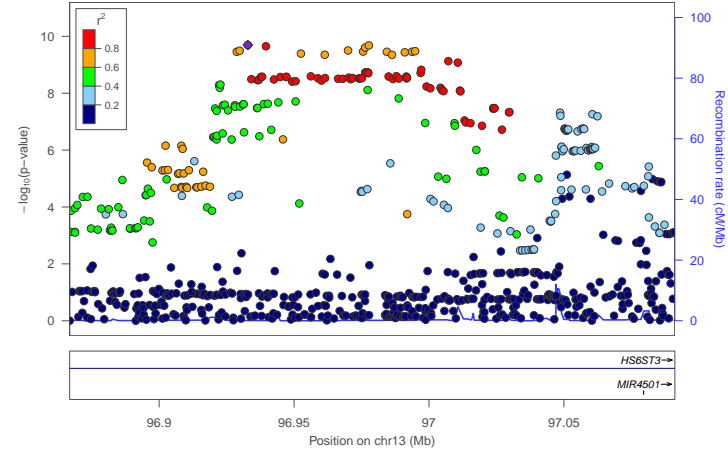

locus\_161

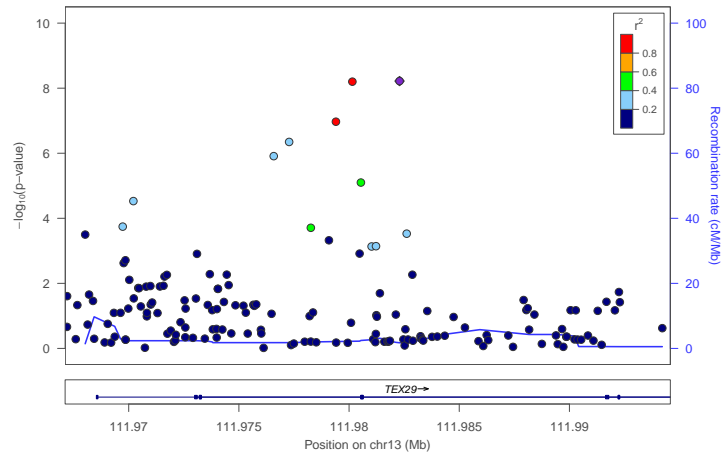

locus\_162

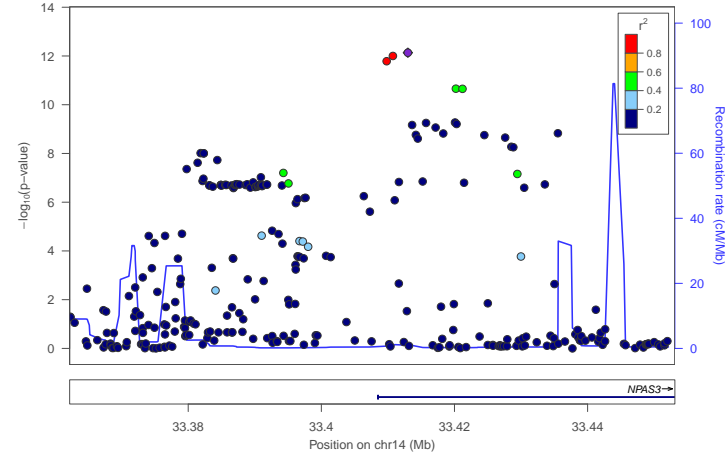

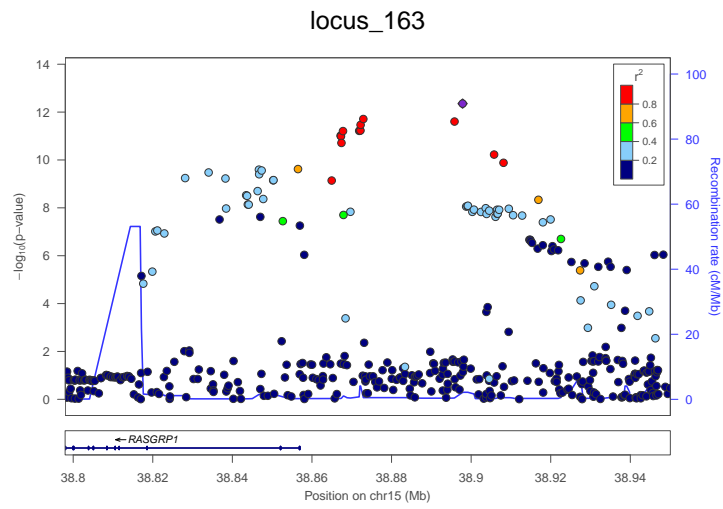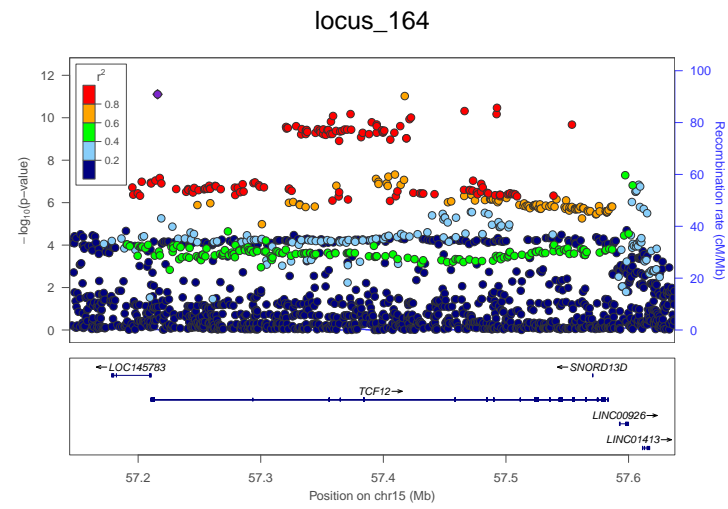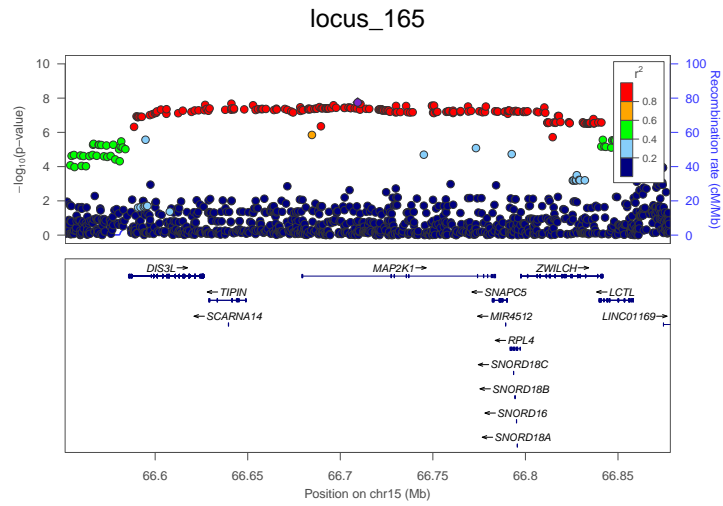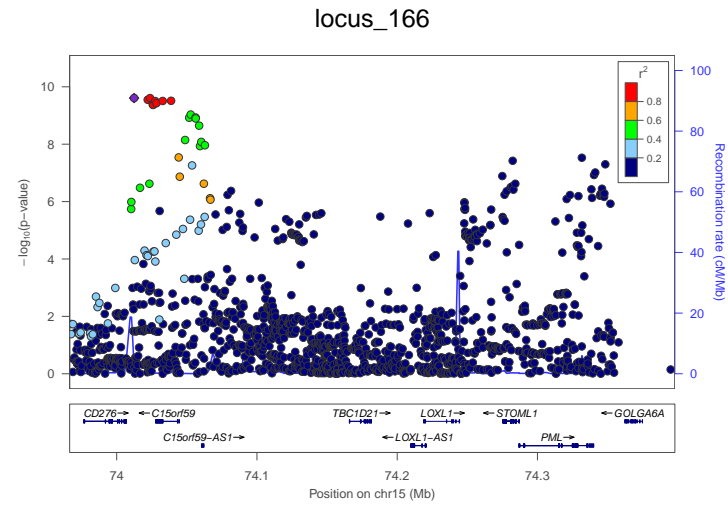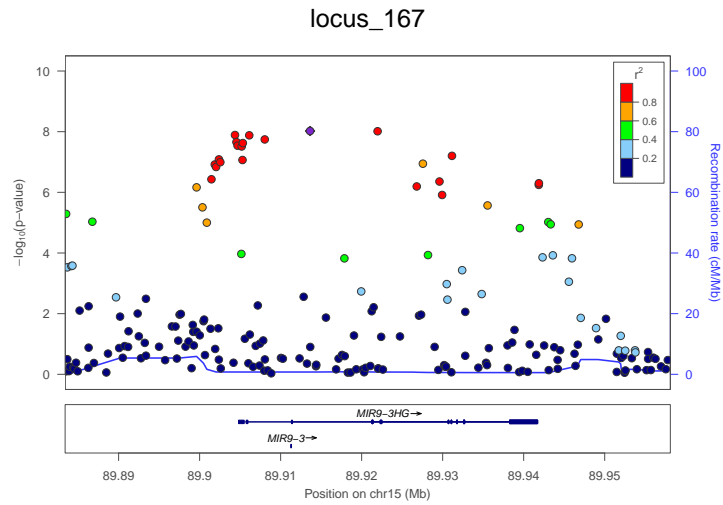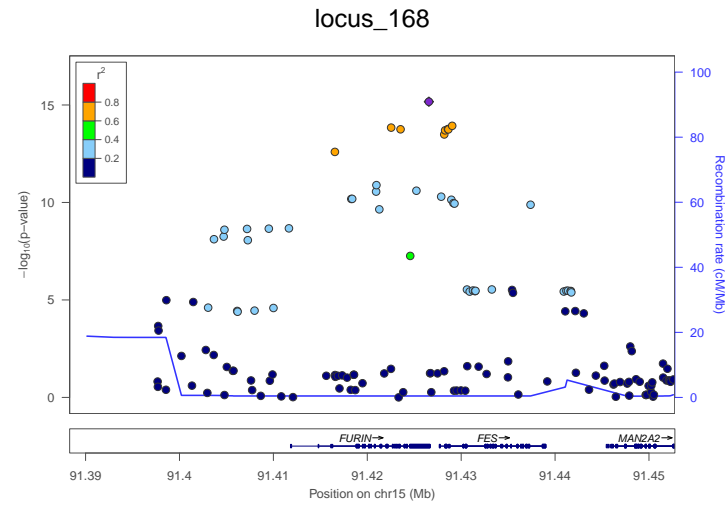



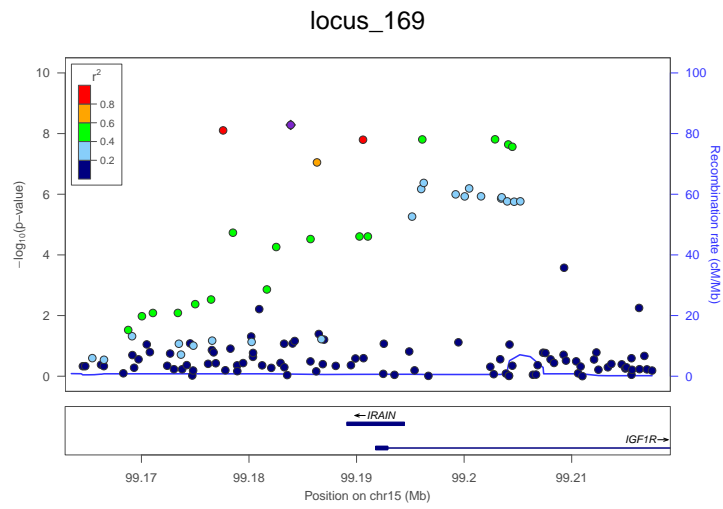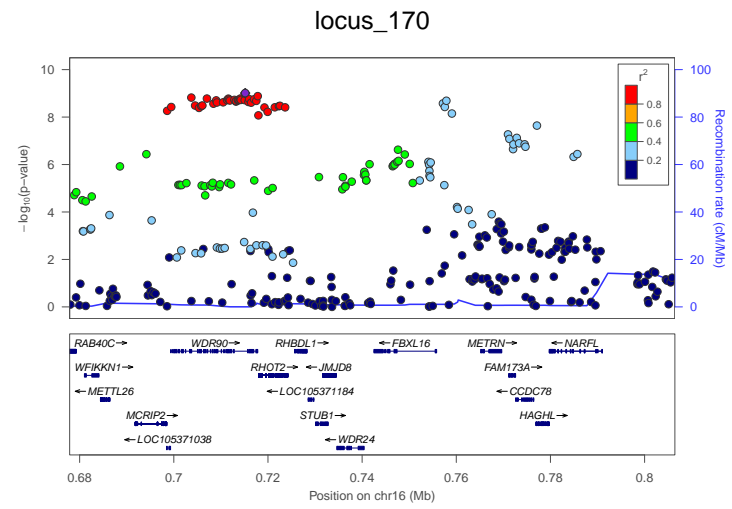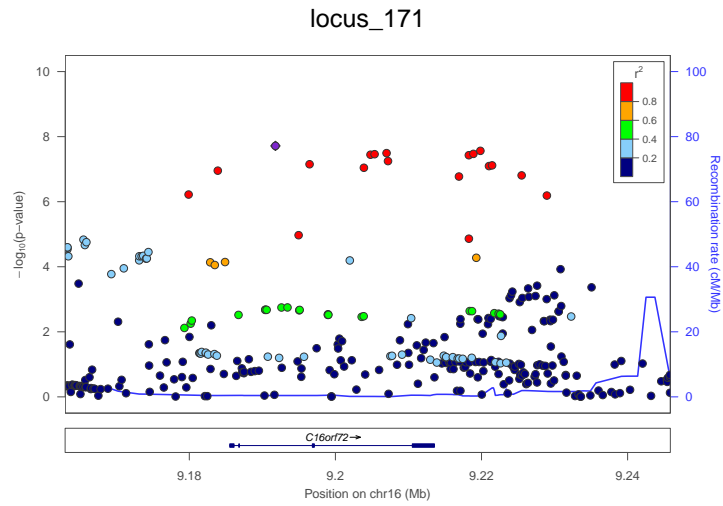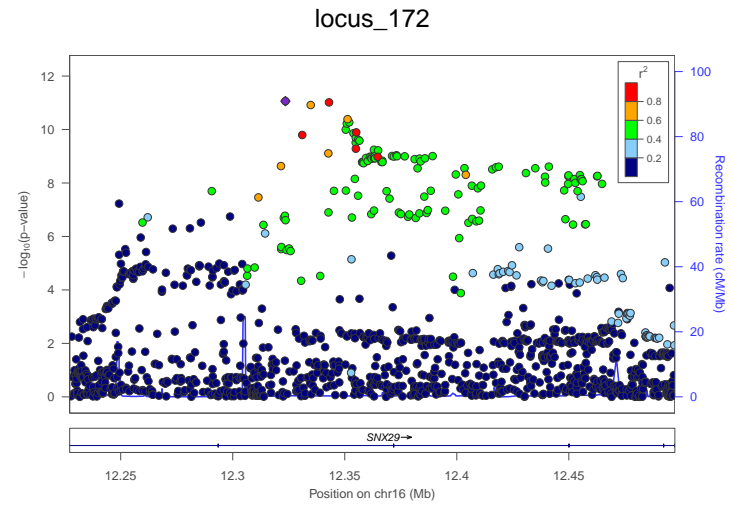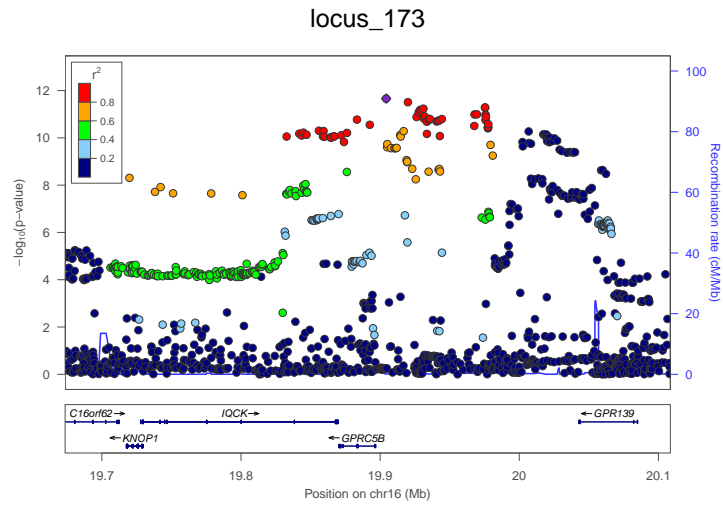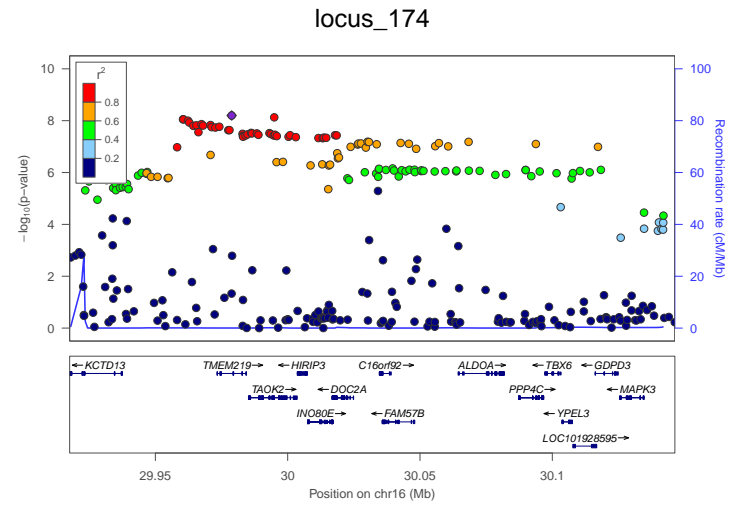

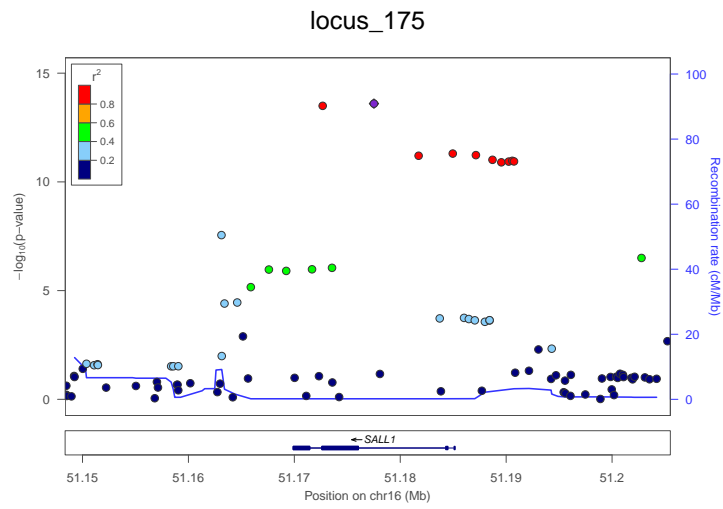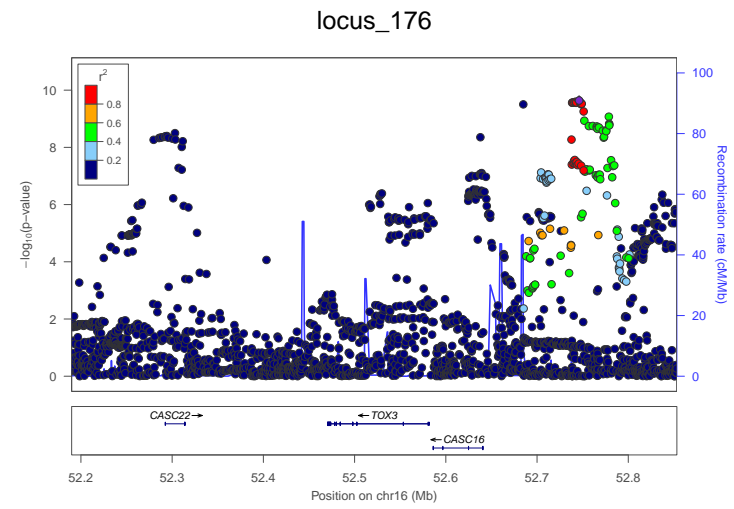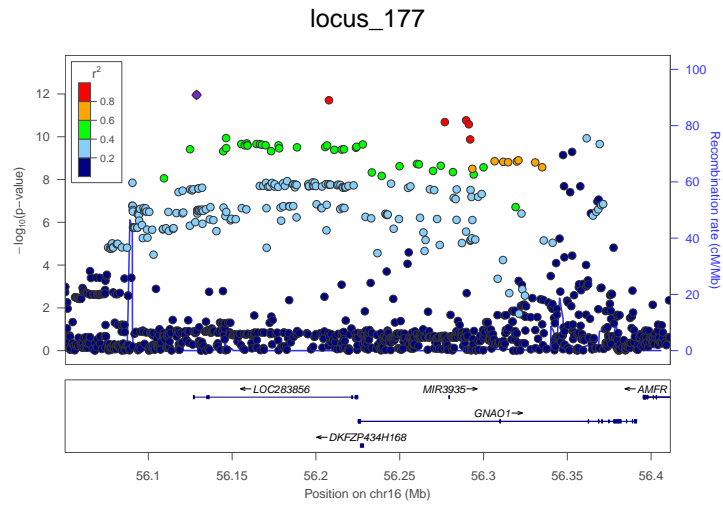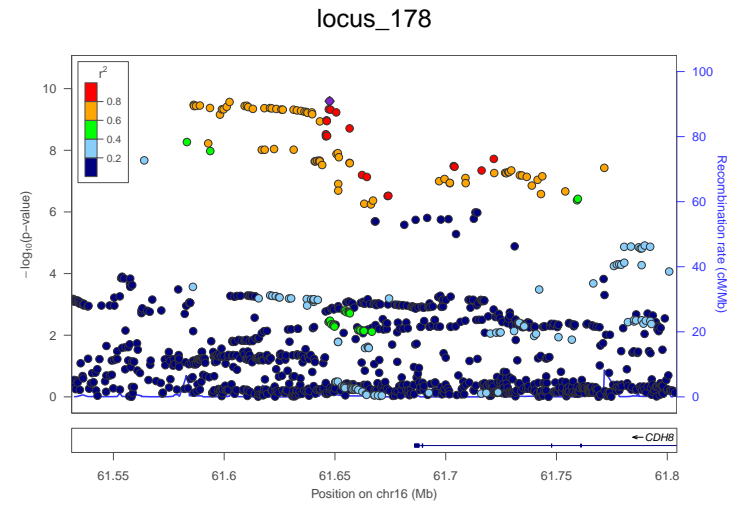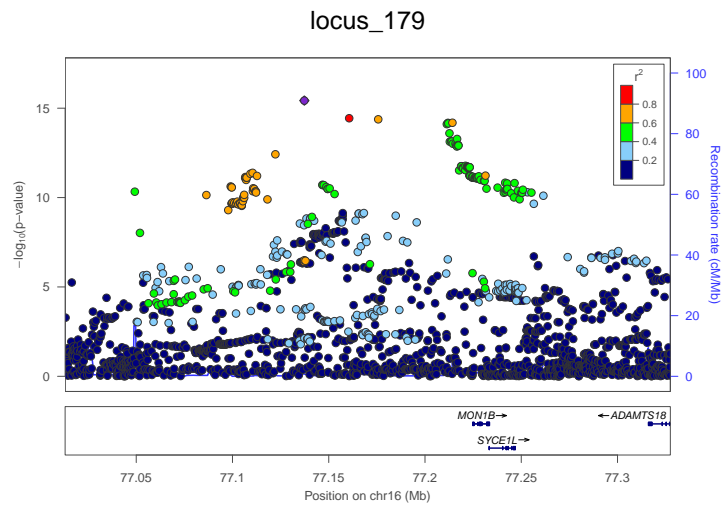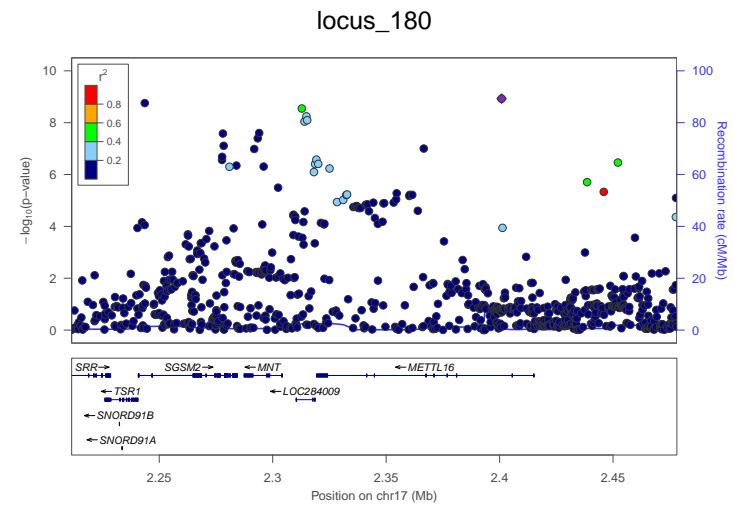



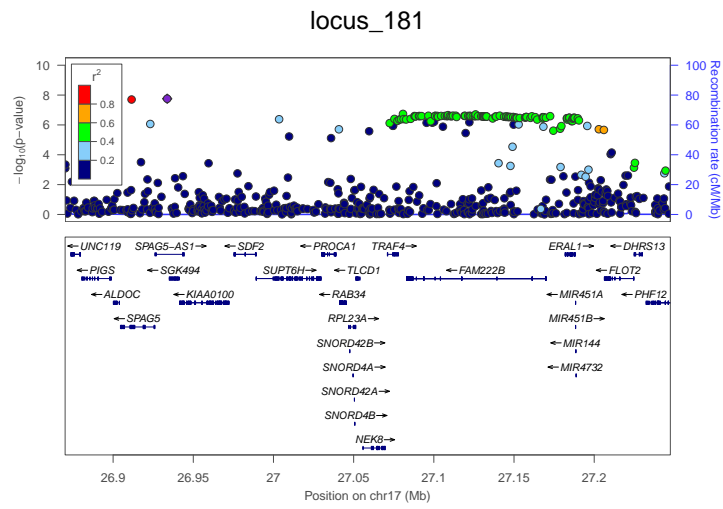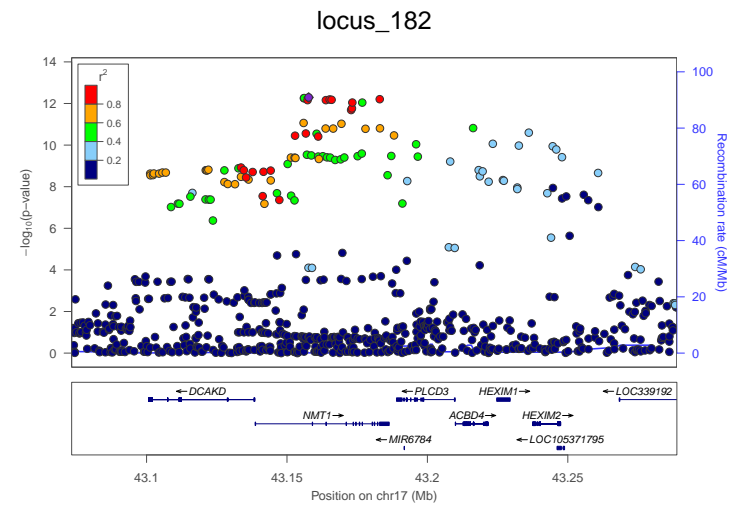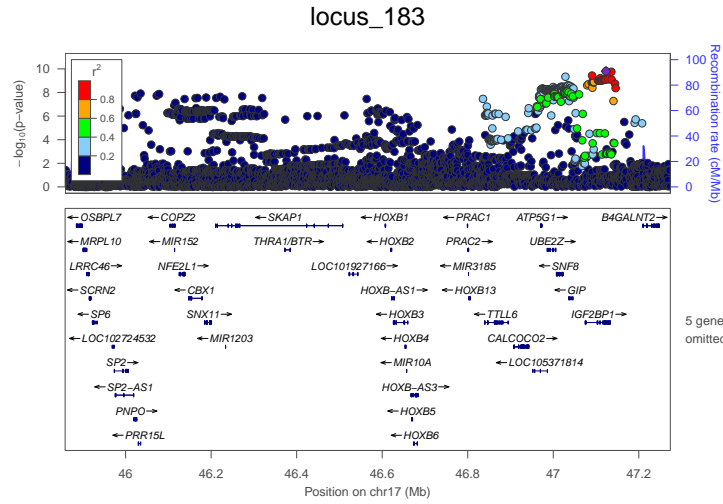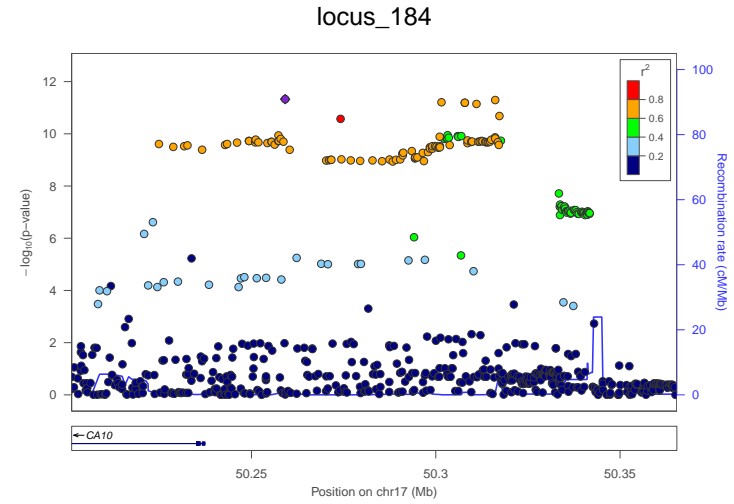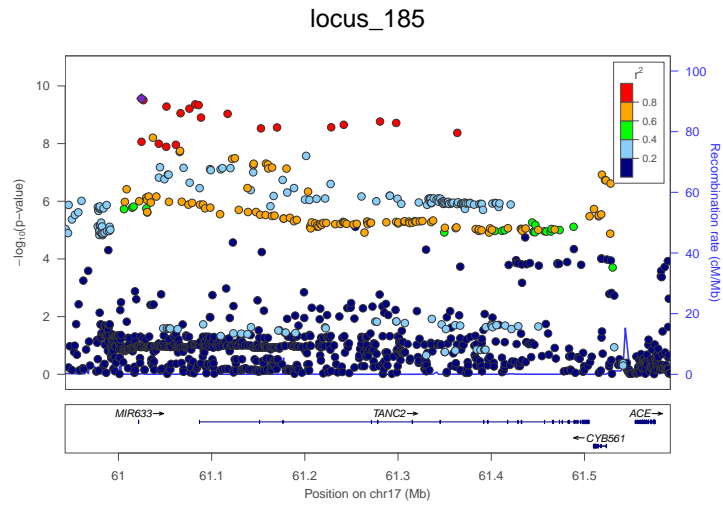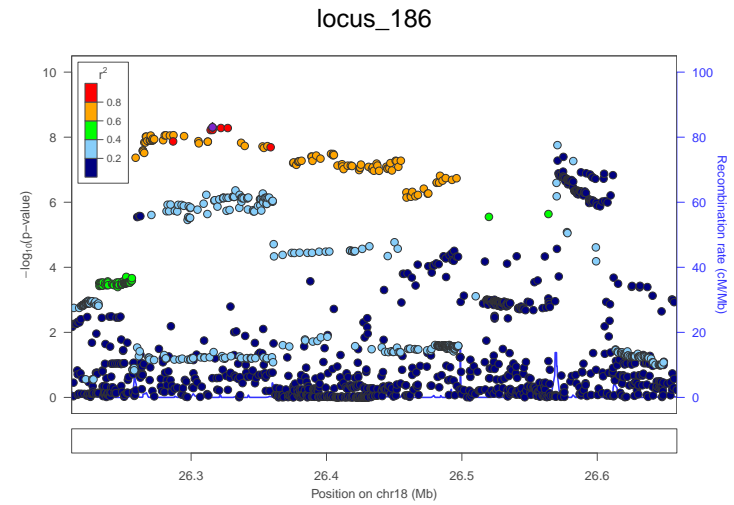

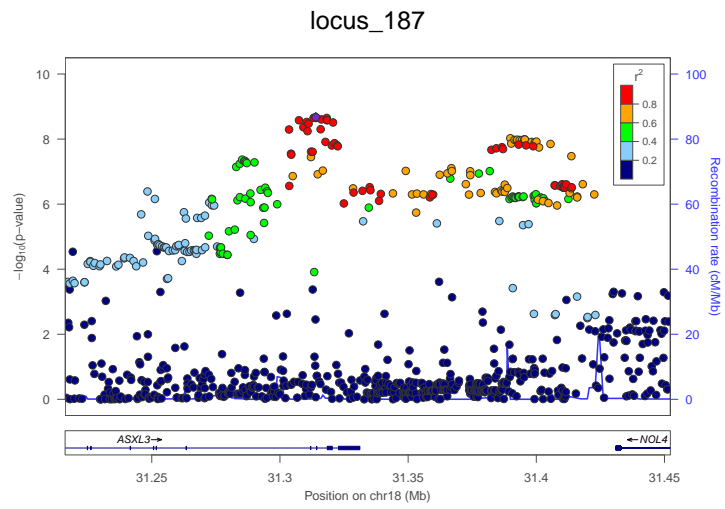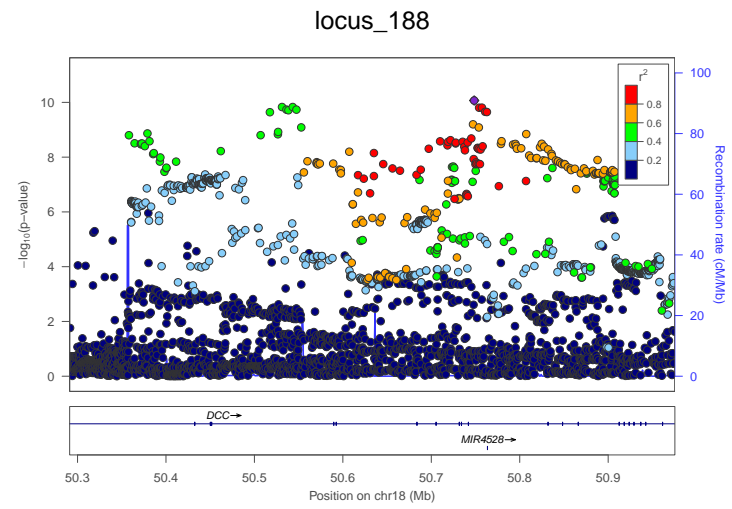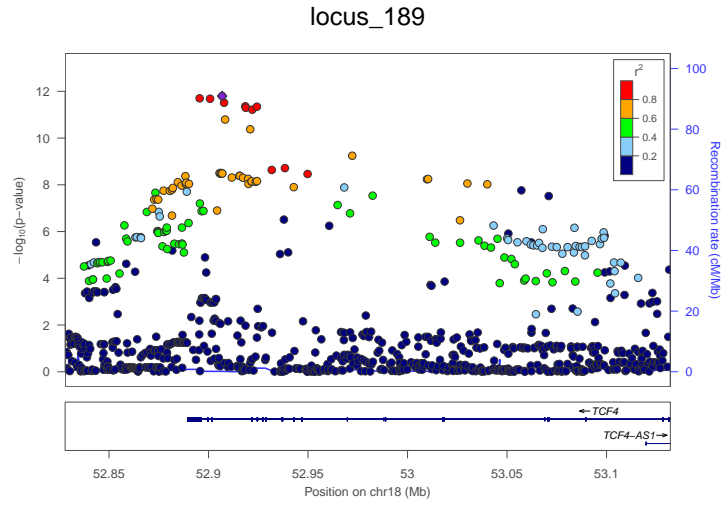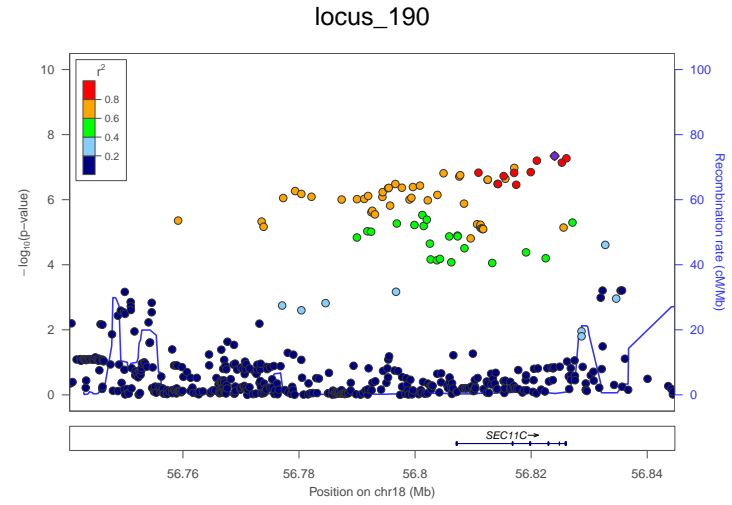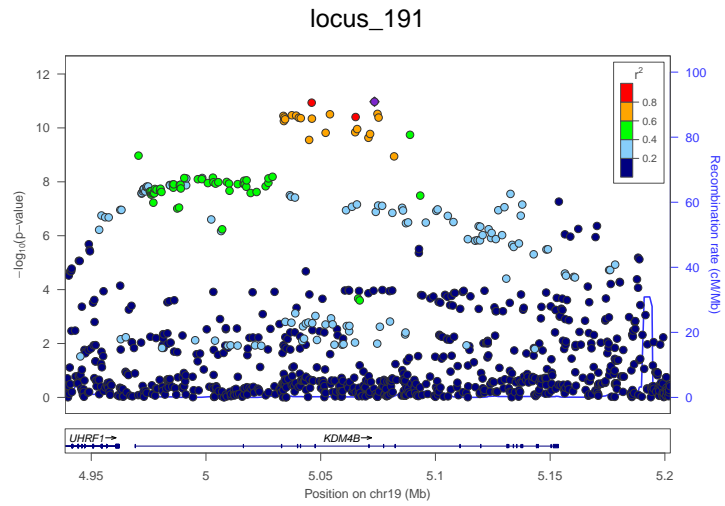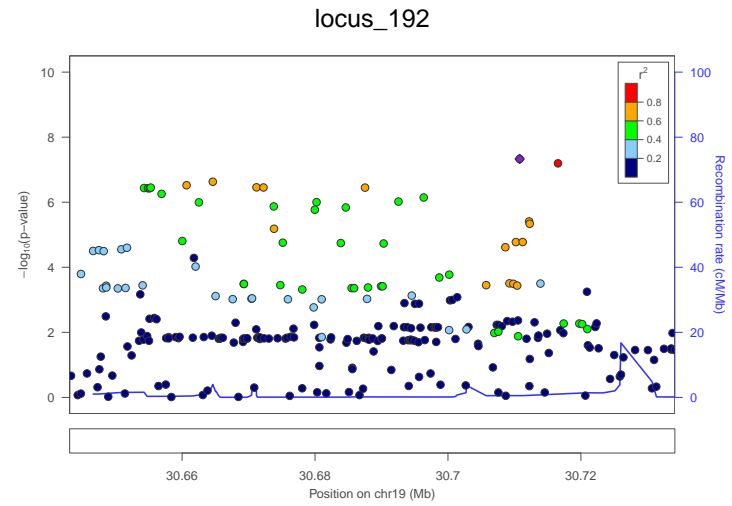

locus\_193

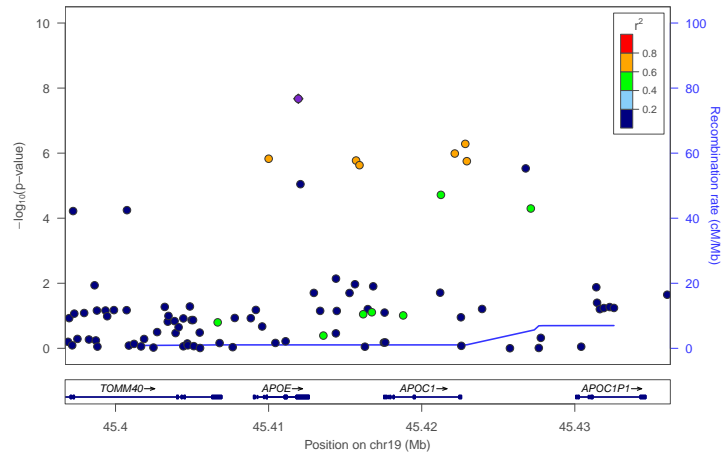

locus\_194

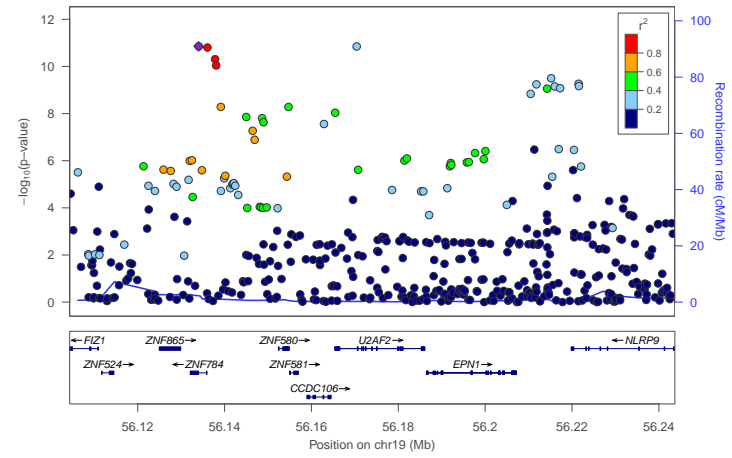

locus\_195

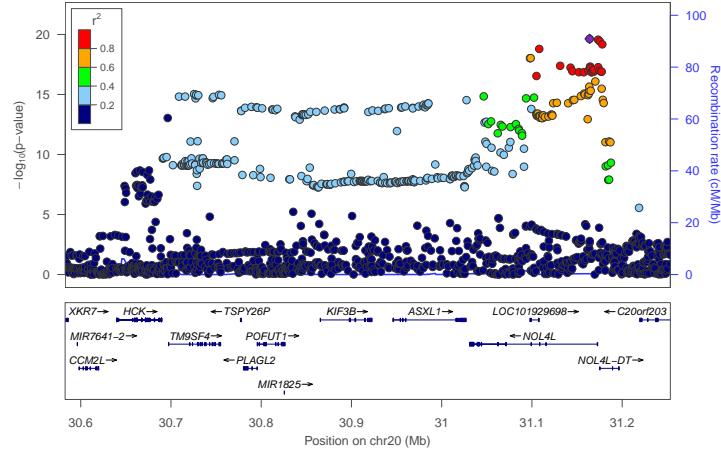

locus\_196

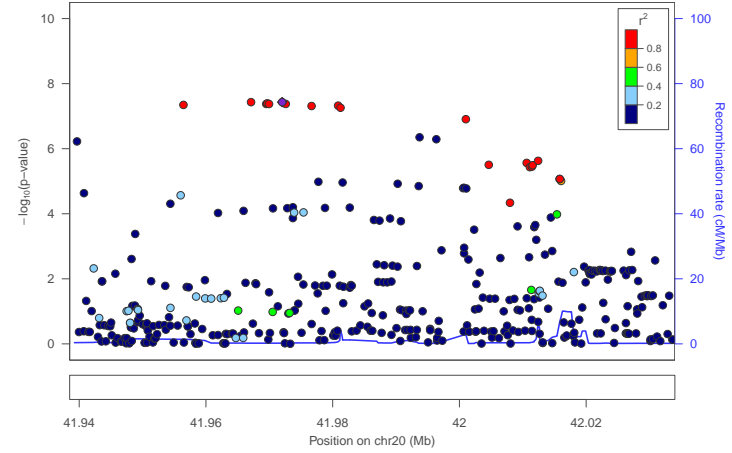

locus\_197

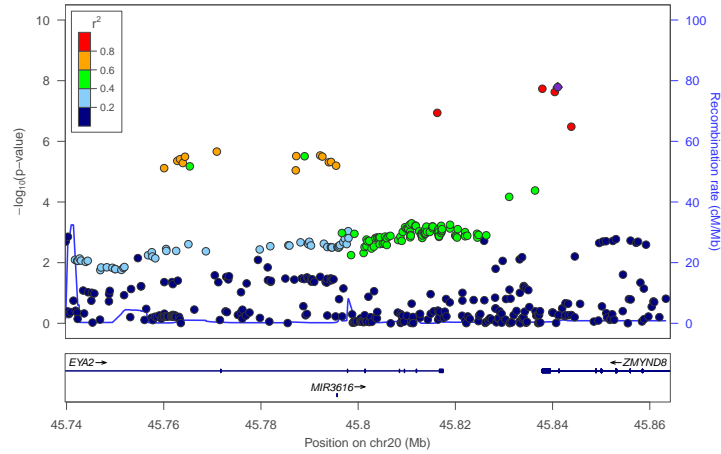

locus\_198

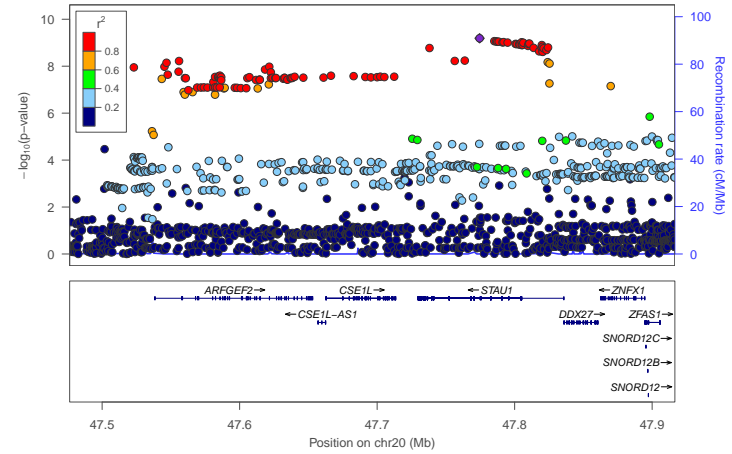

locus\_199

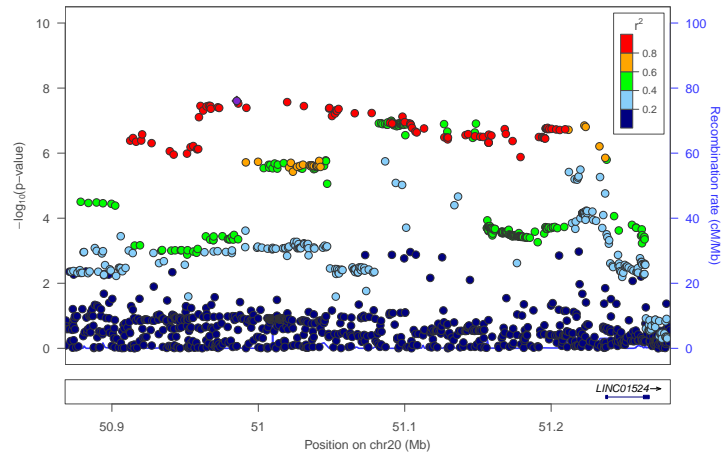

locus\_200

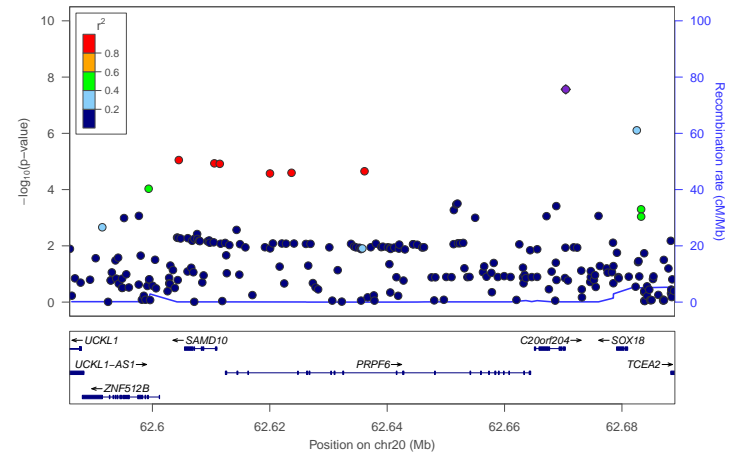

locus\_201

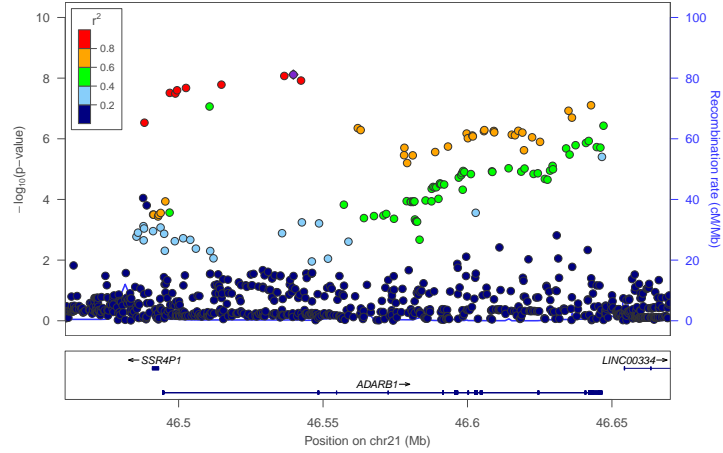

locus\_202

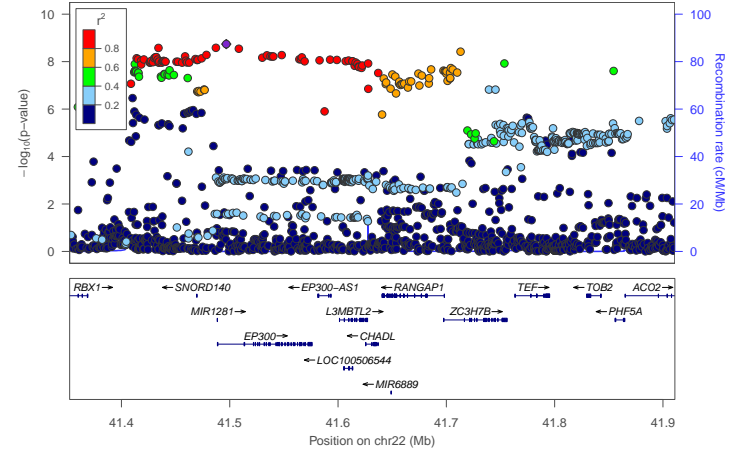

# Chromosome 1

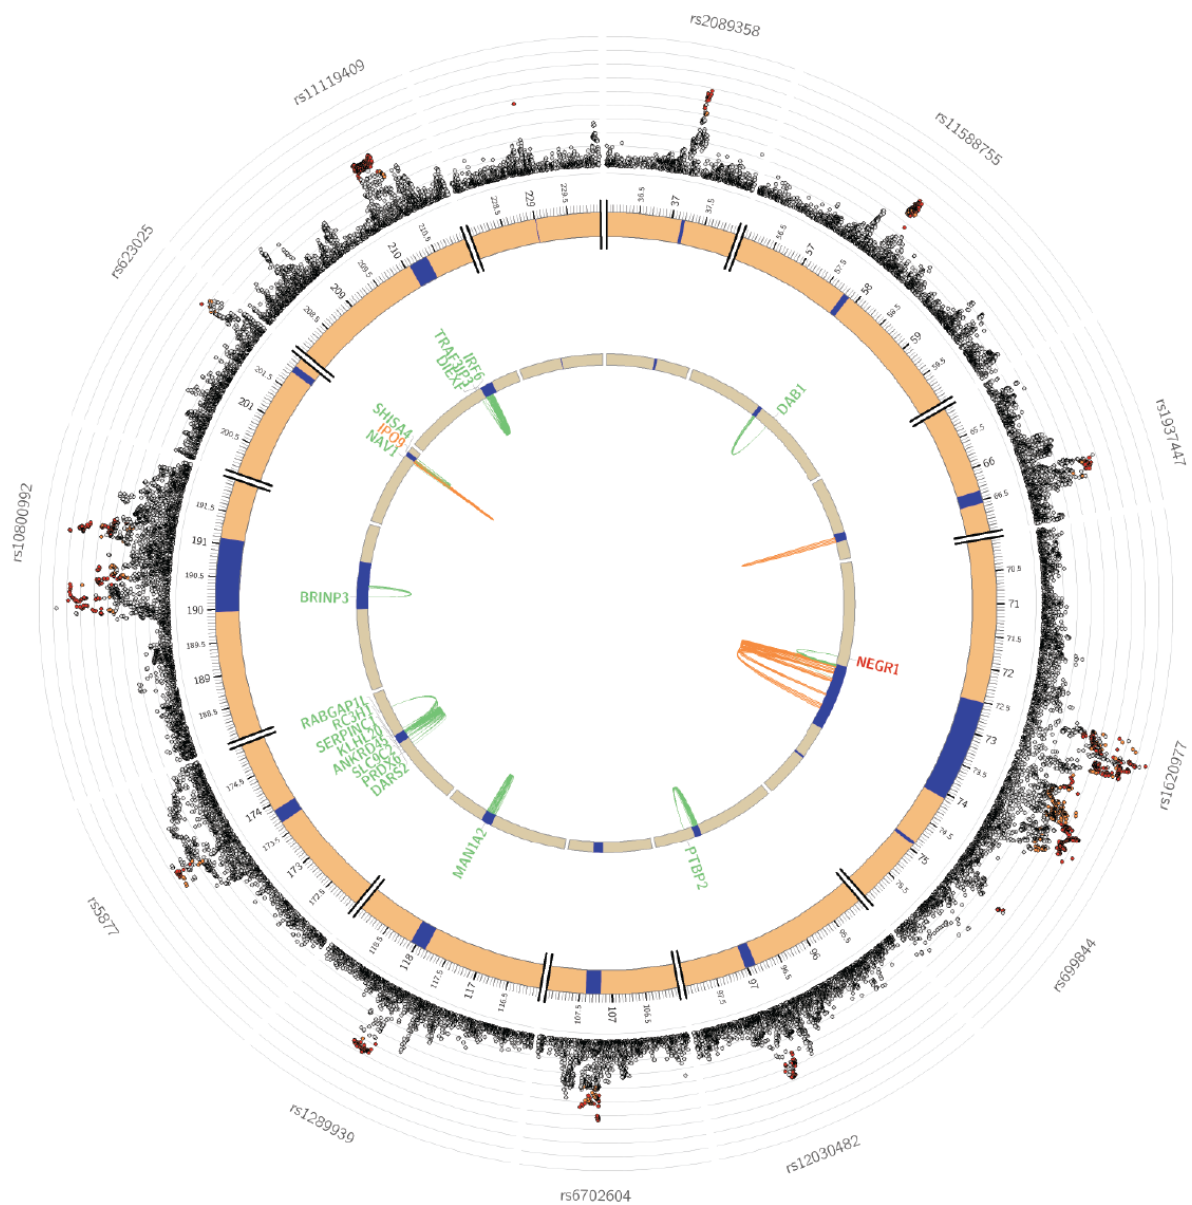

# Chromosome 2

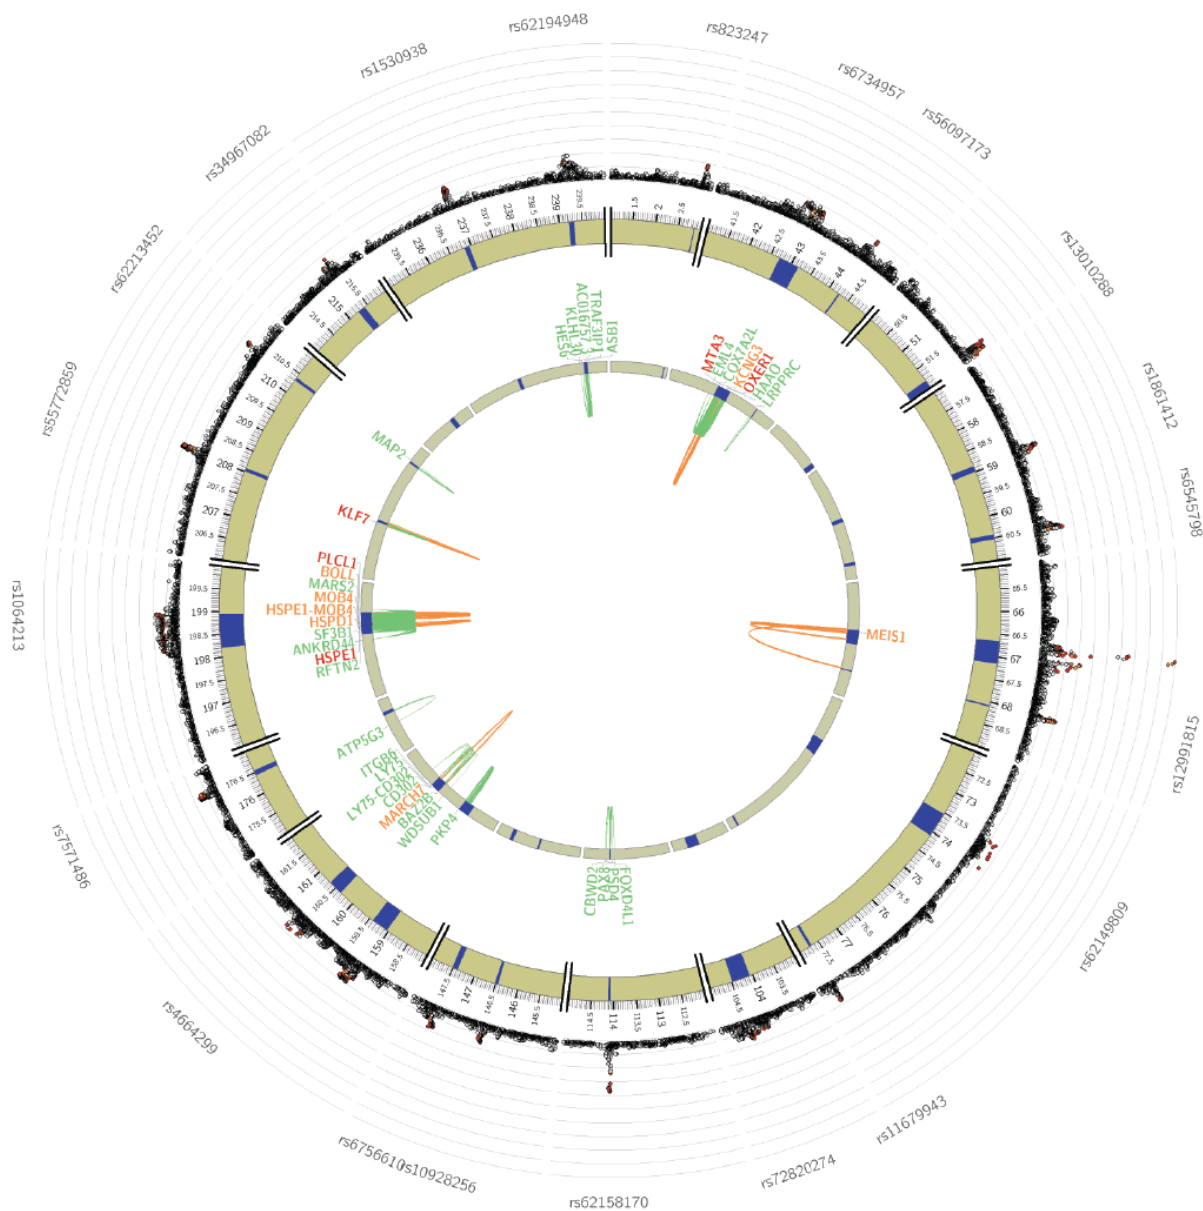



## Chromosome 3

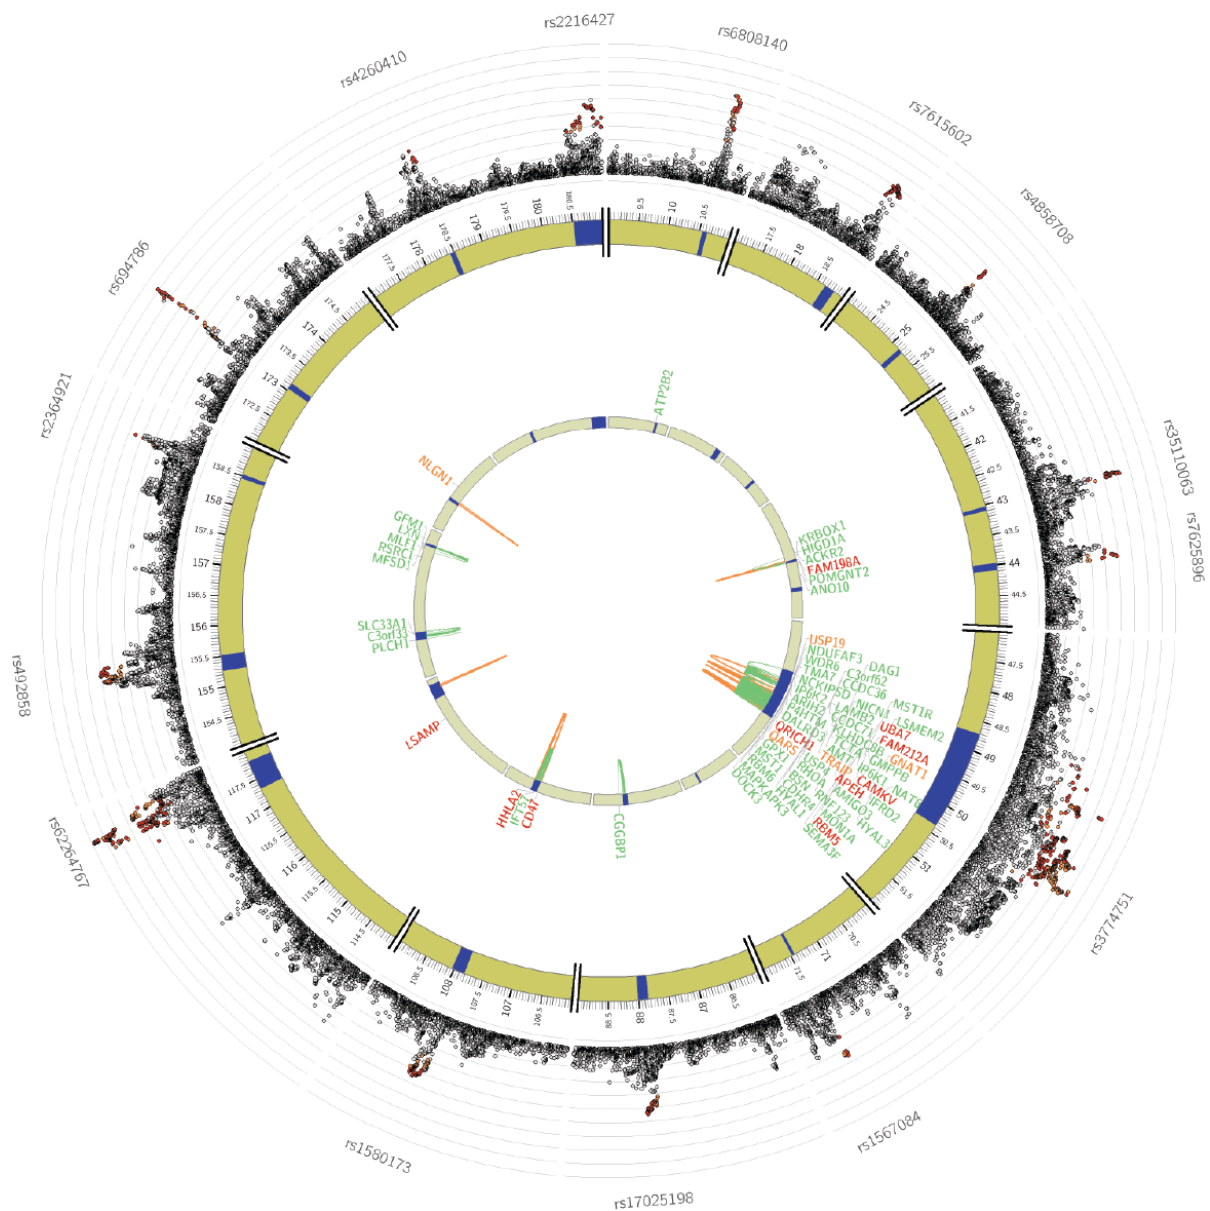

## Chromosome 4

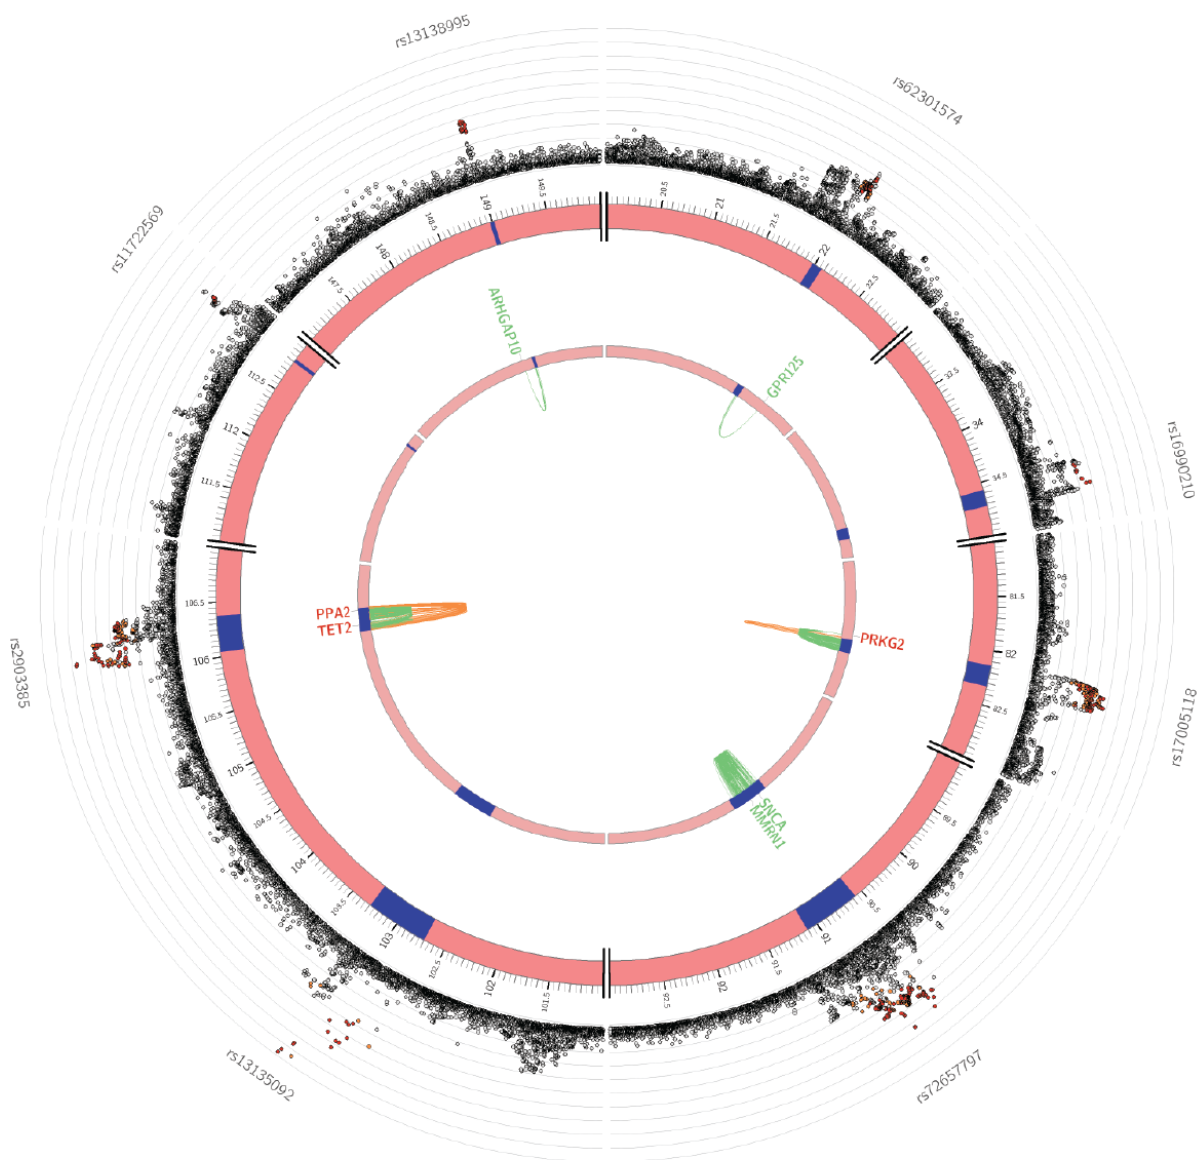



# Chromosome 5

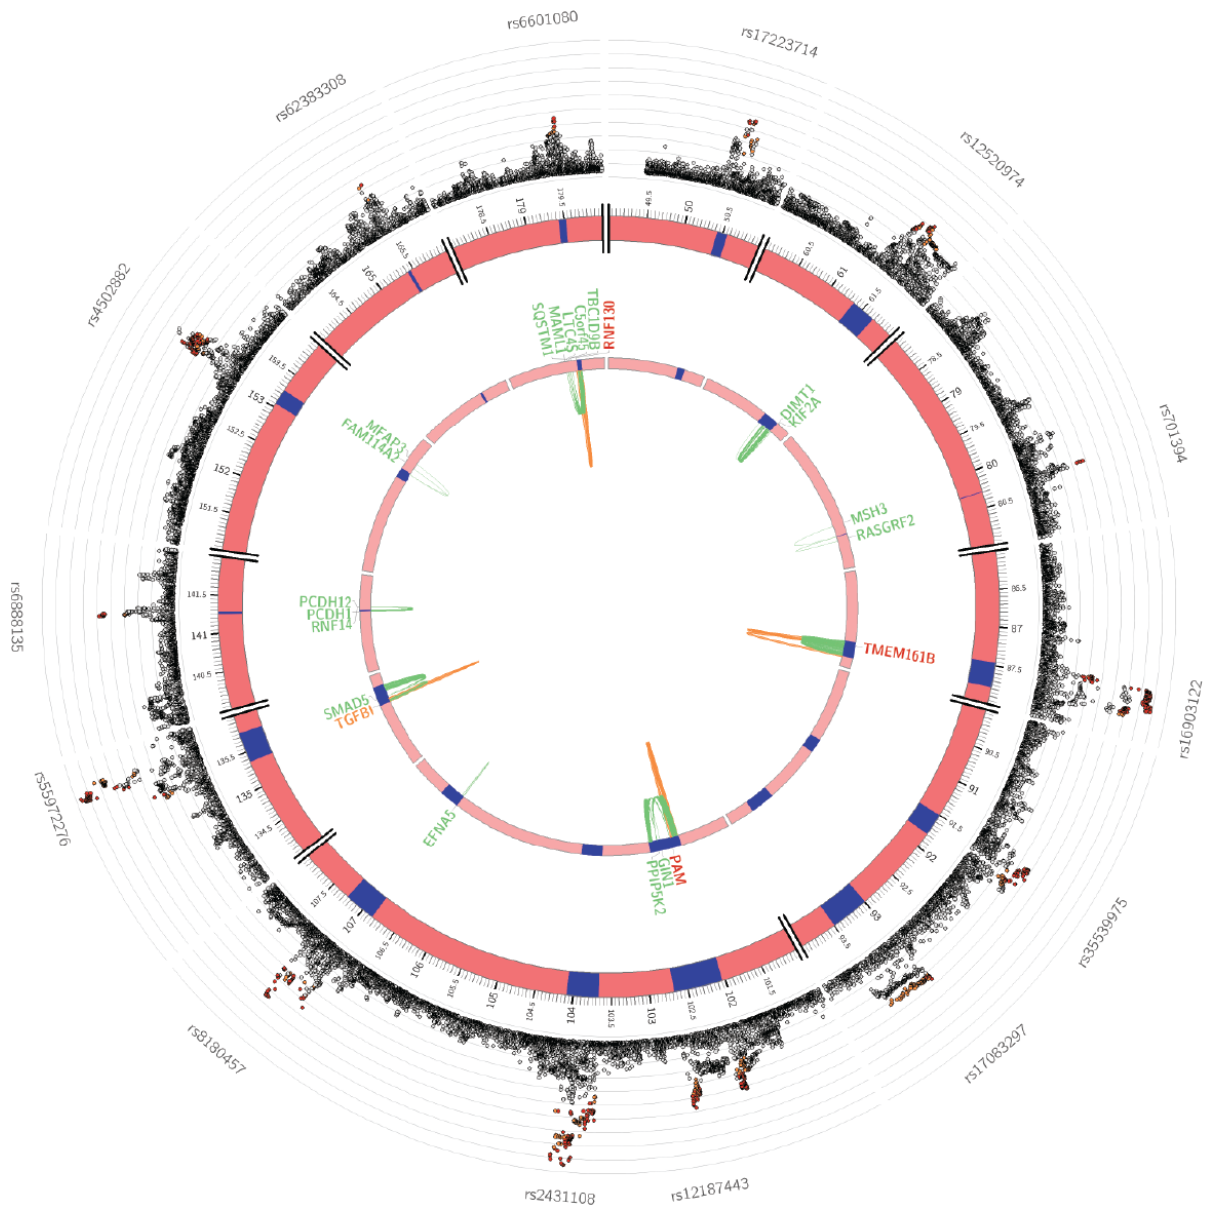

## Chromosome 6

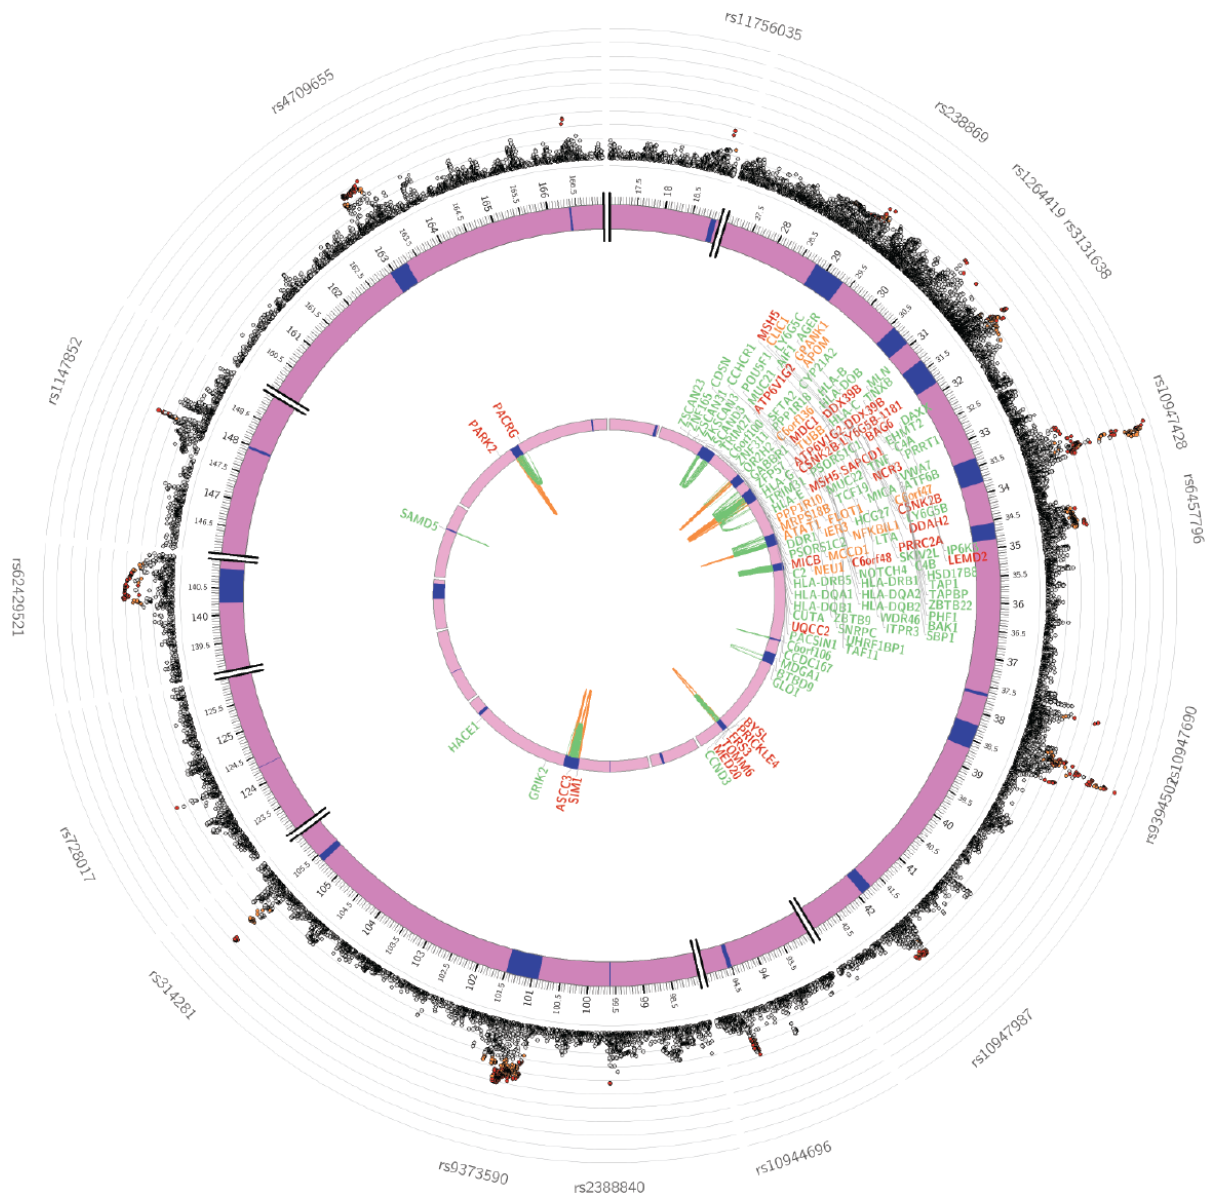

# Chromosome 7

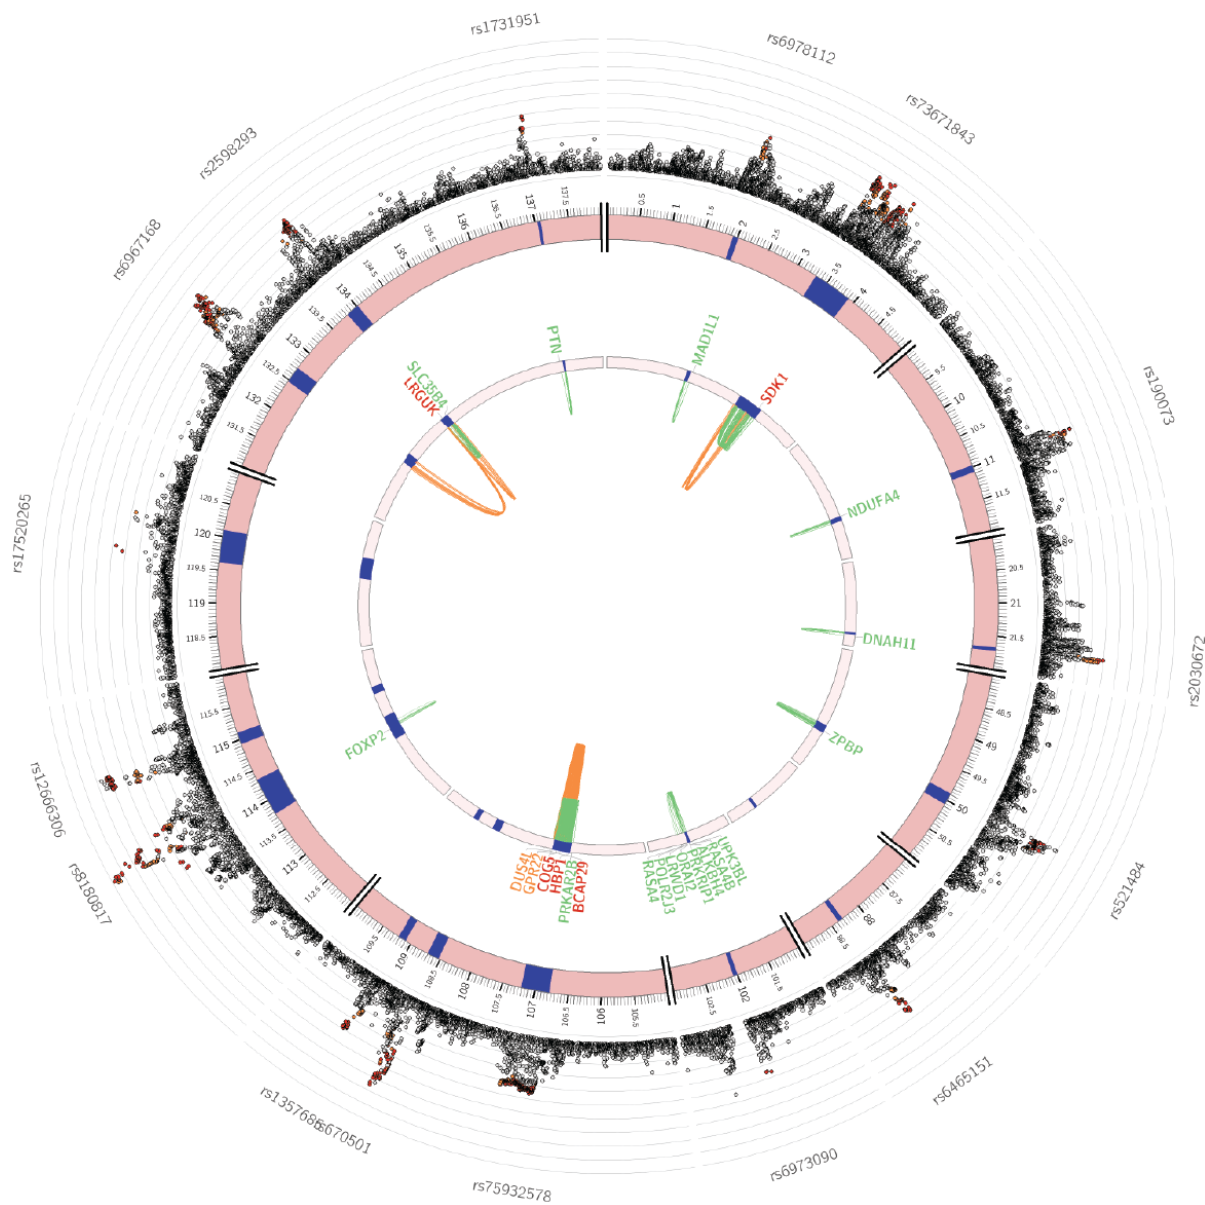

## Chromosome 8

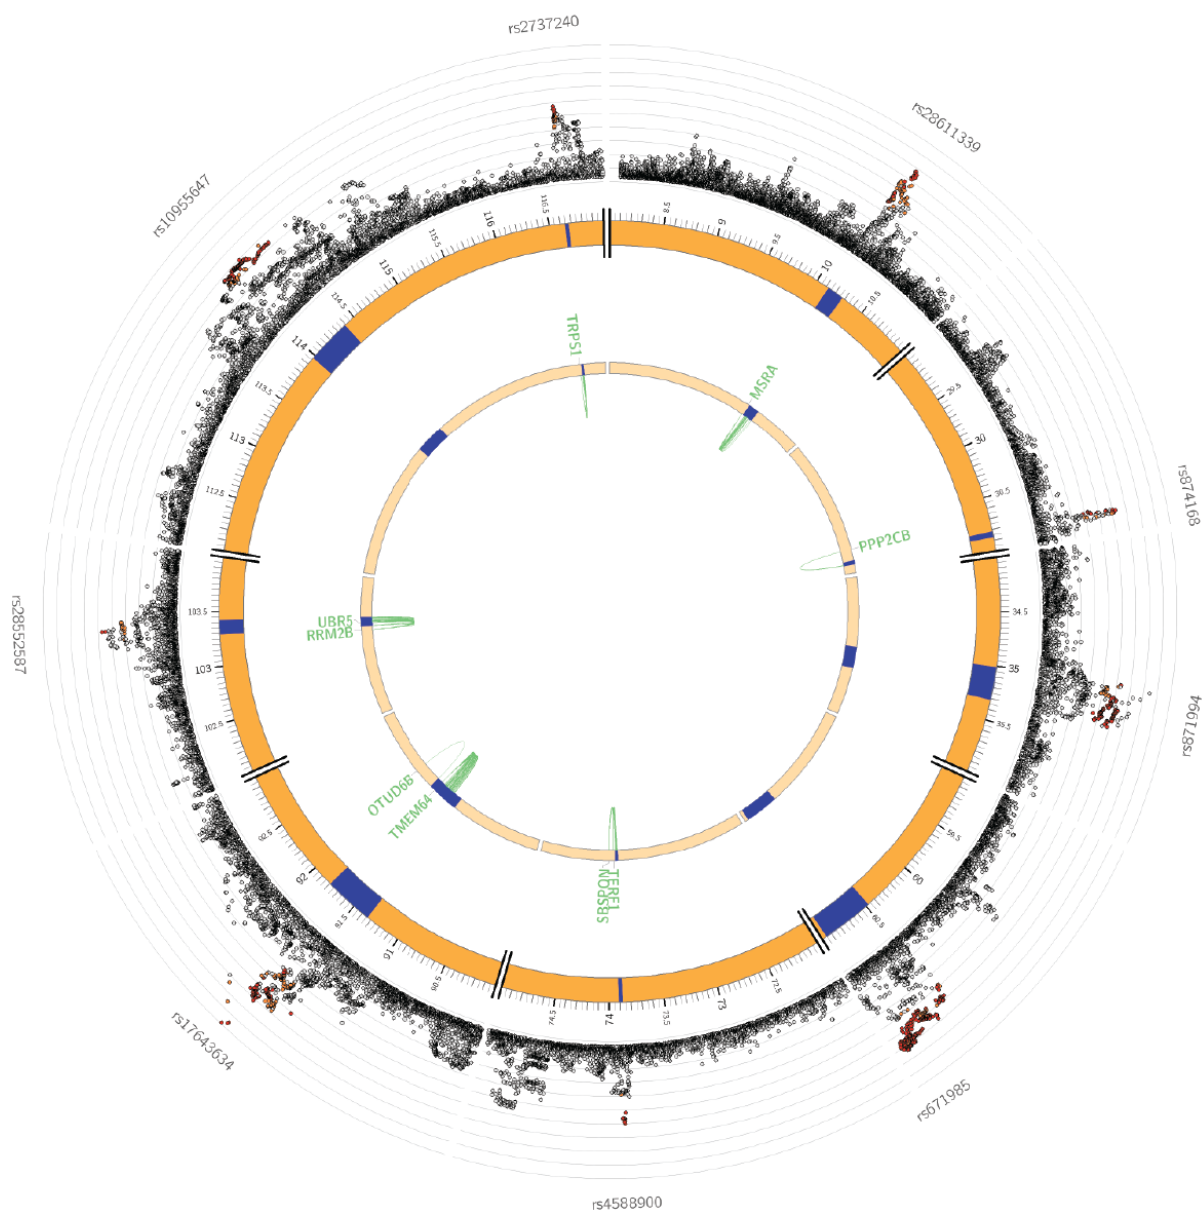

# Chromosome 9

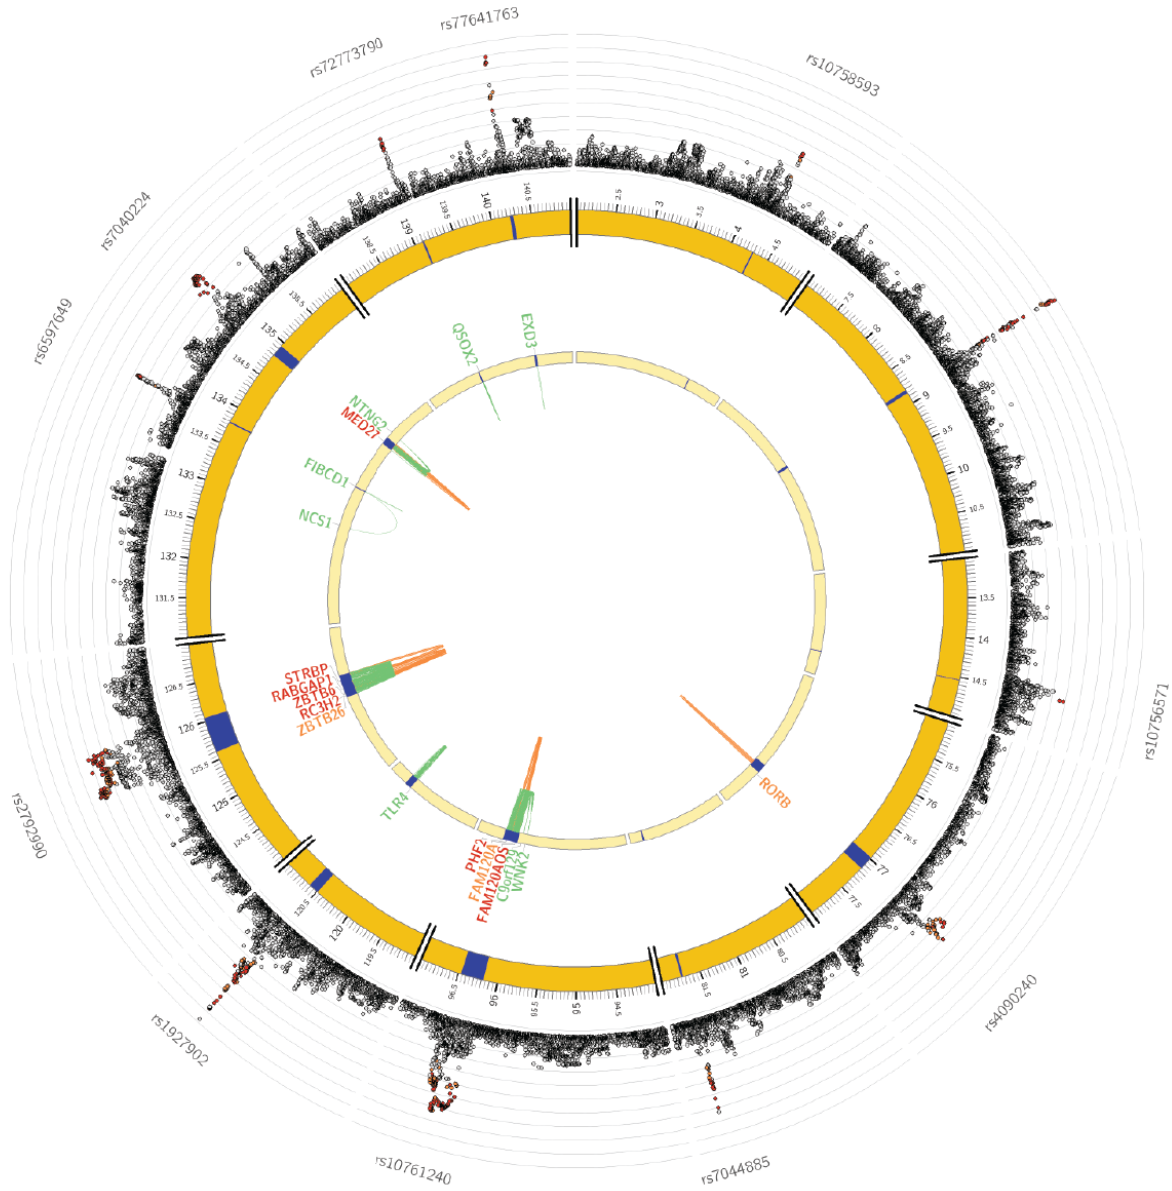



# Chromosome 10

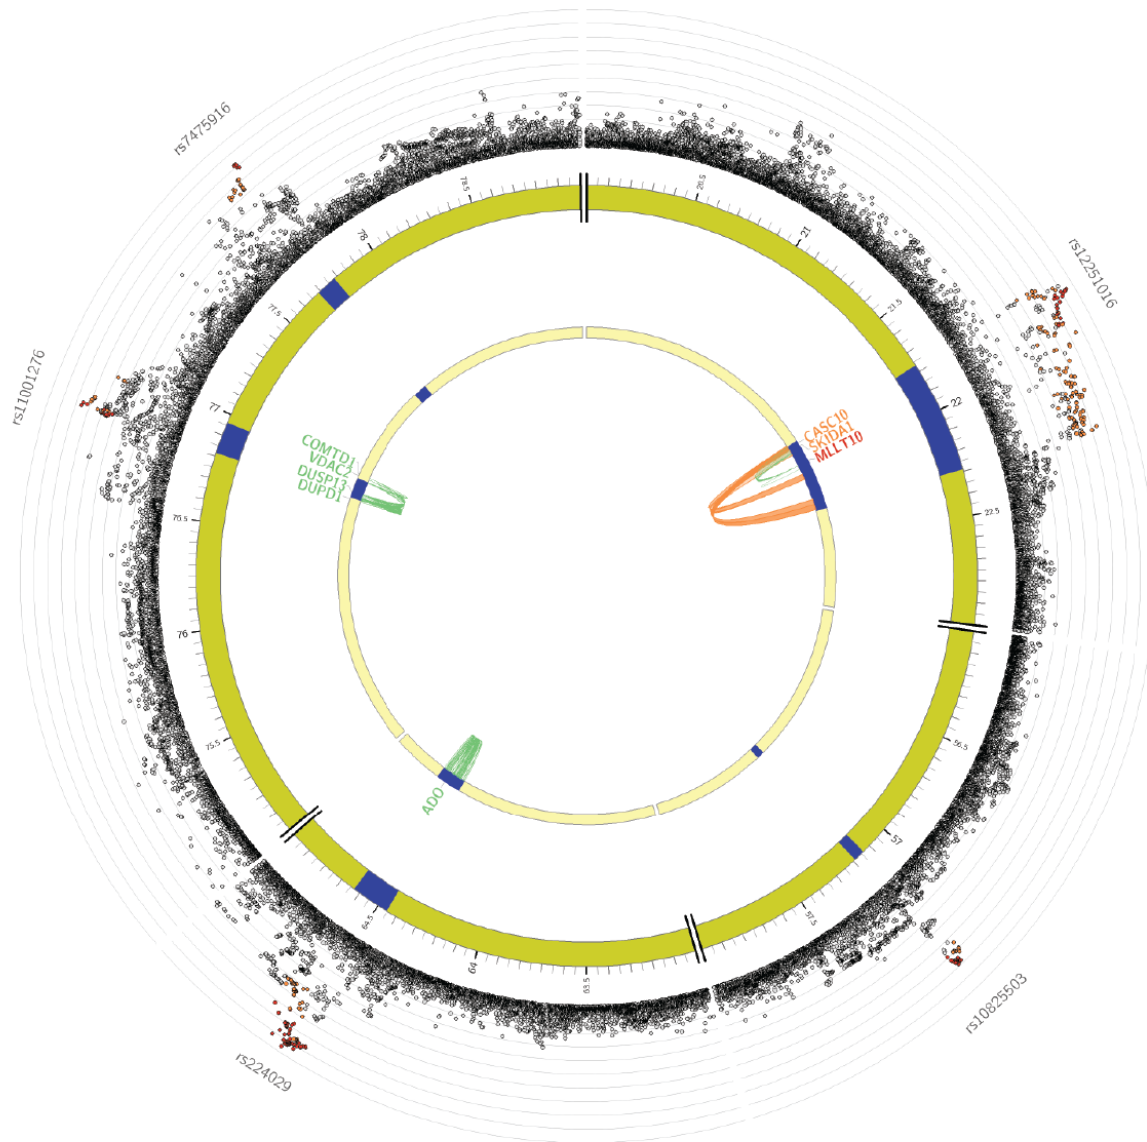



# Chromosome 12

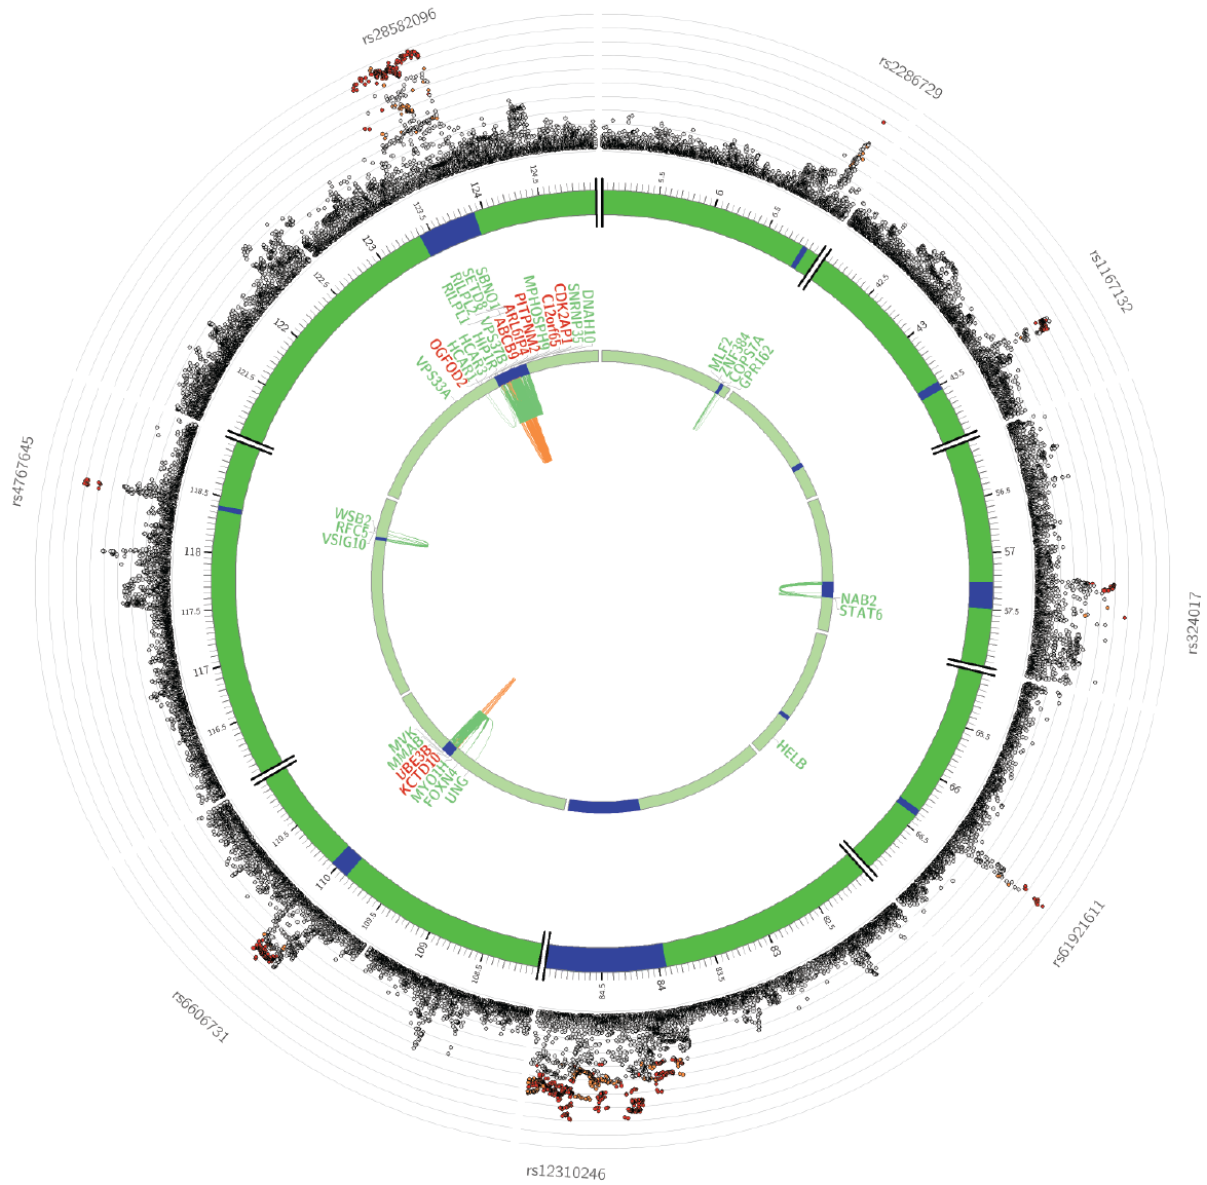



# Chromosome 13

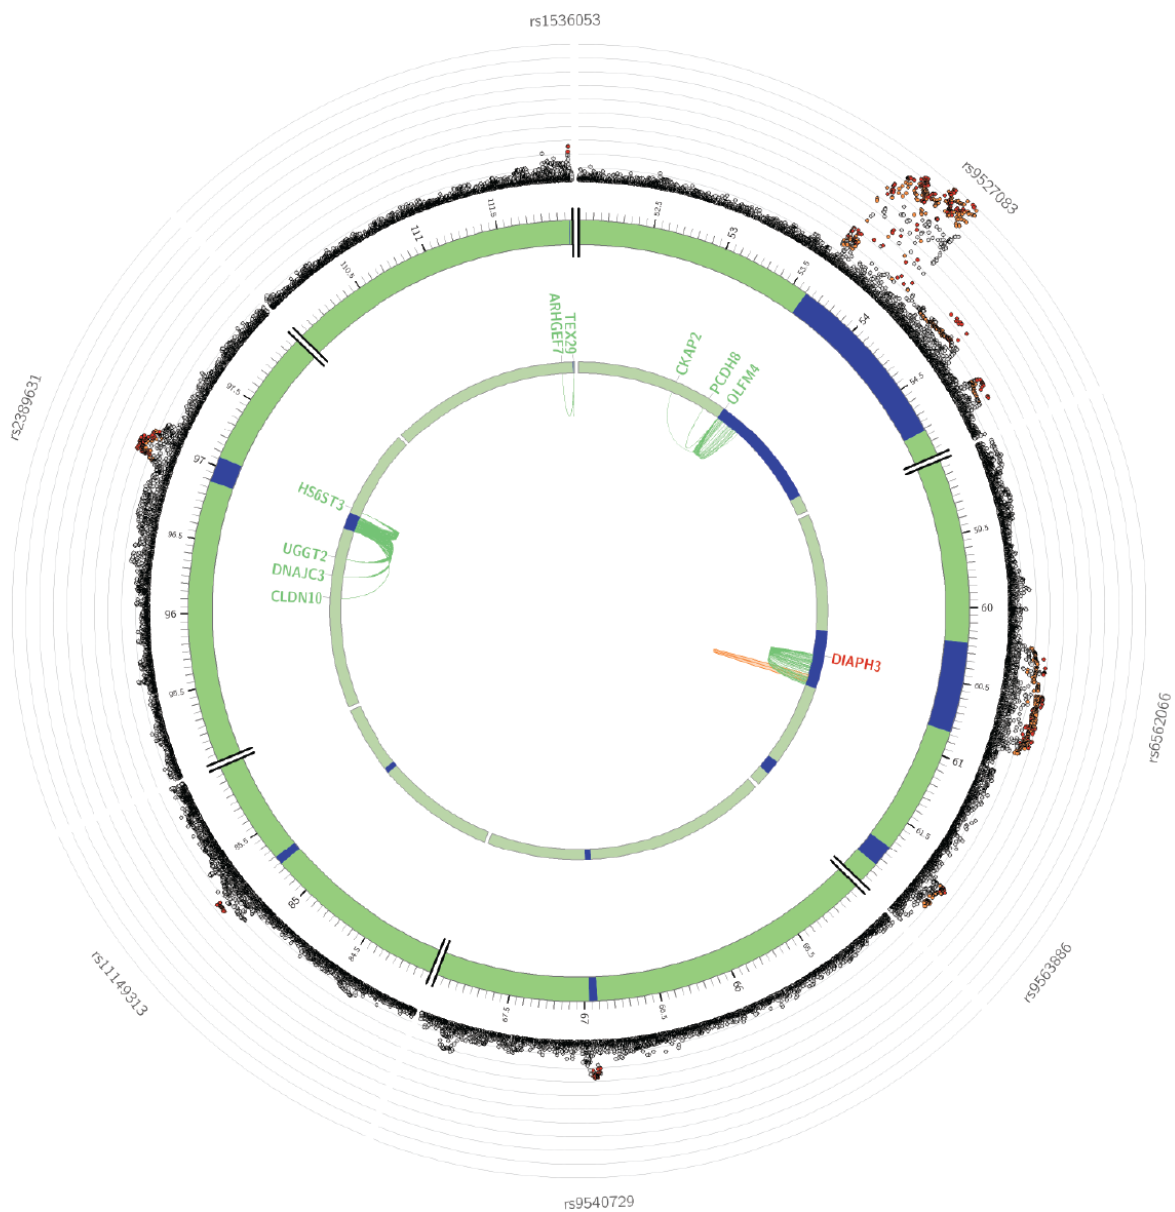

# Chromosome 14

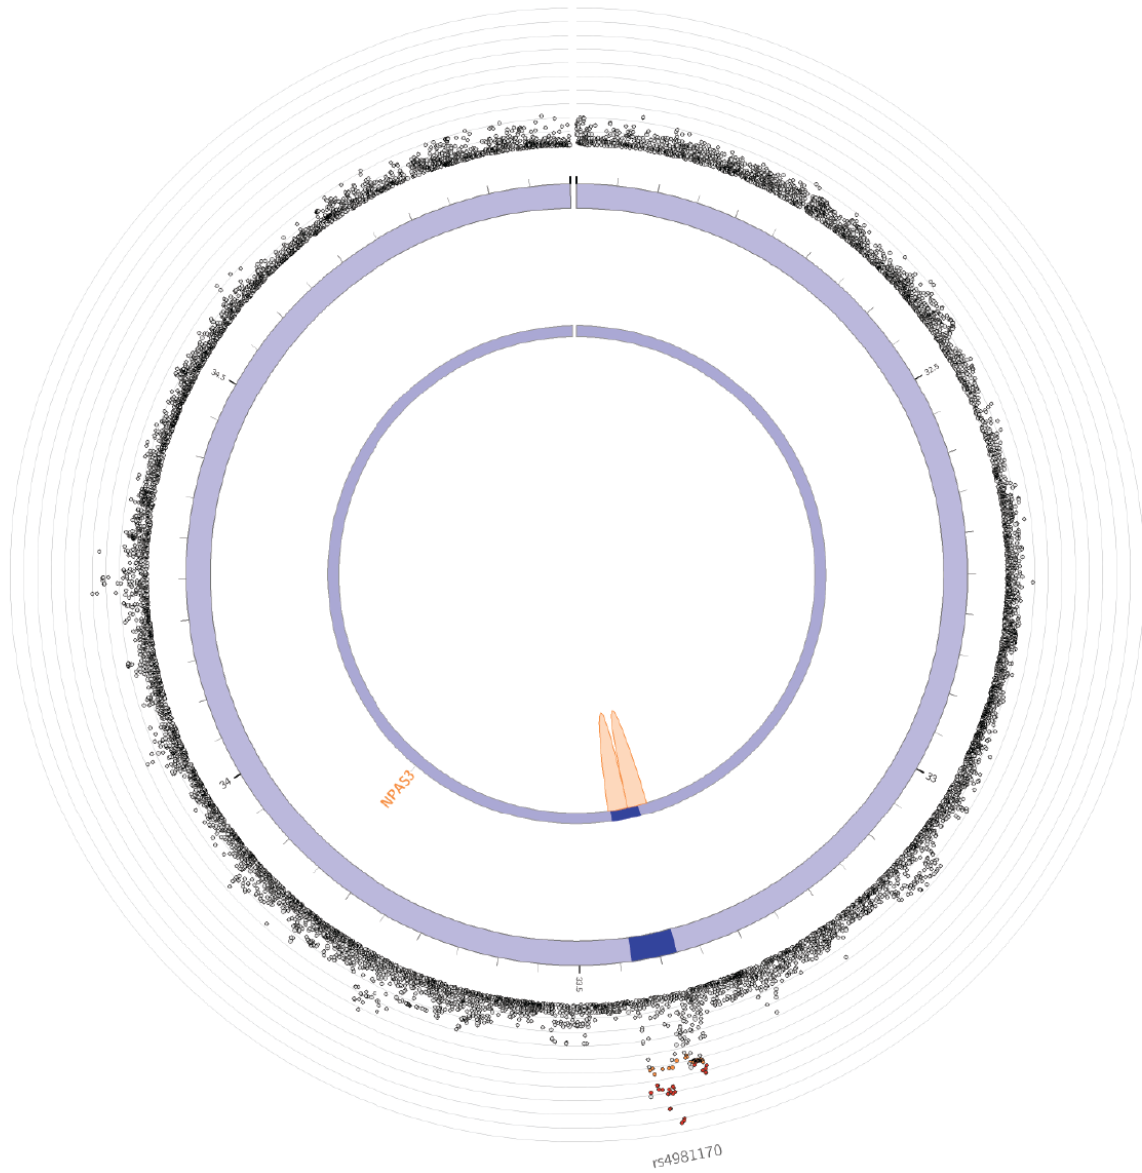

# Chromosome 15

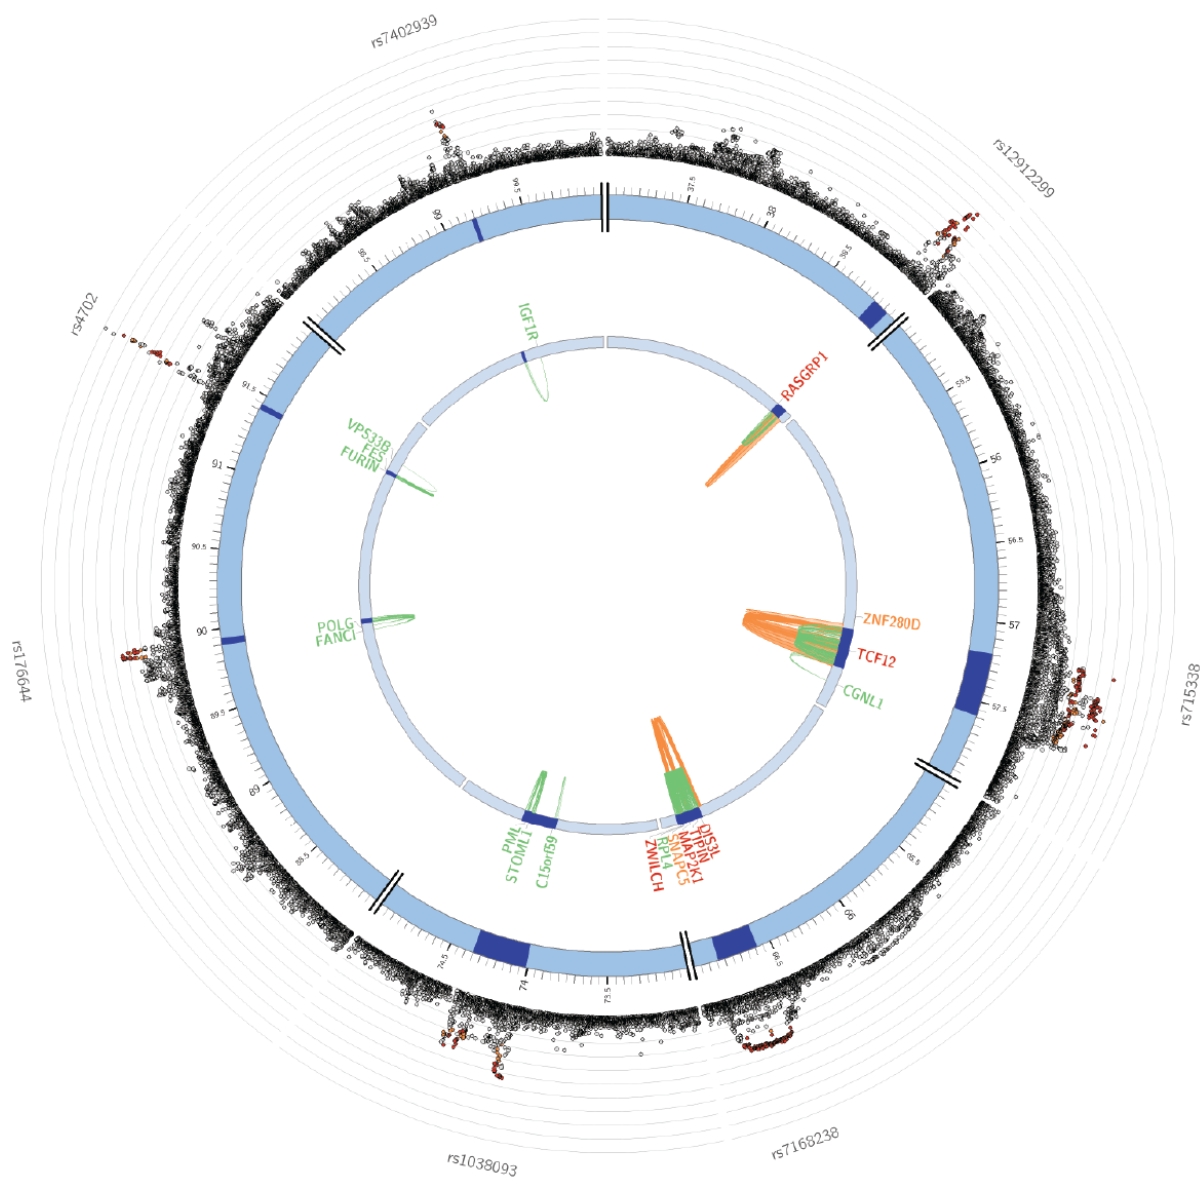

# Chromosome 16

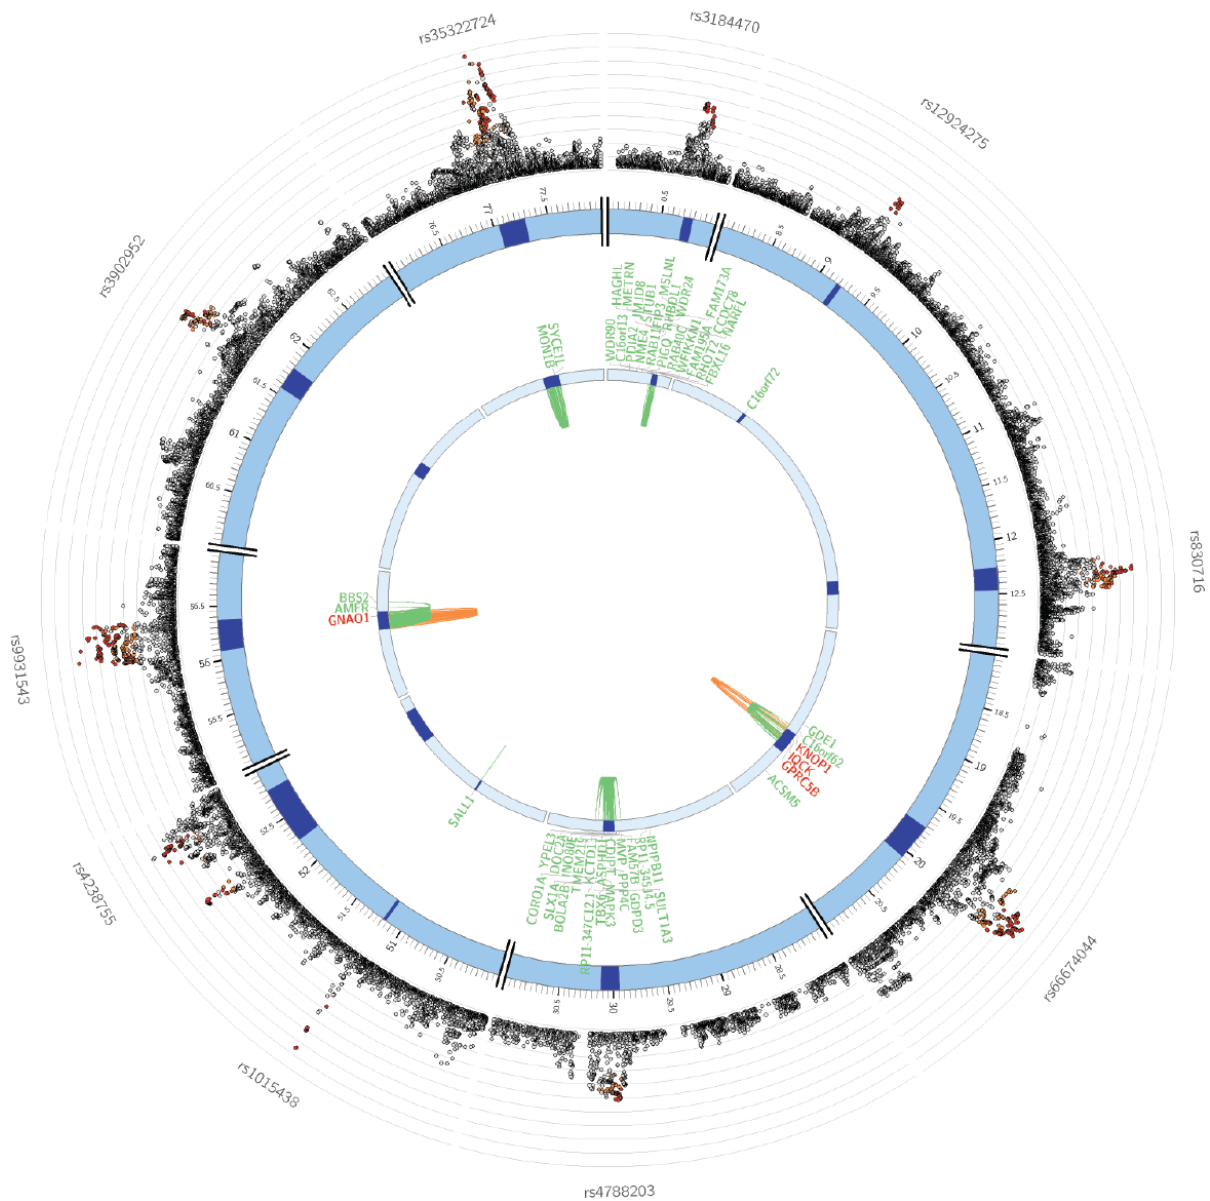



## Chromosome 18

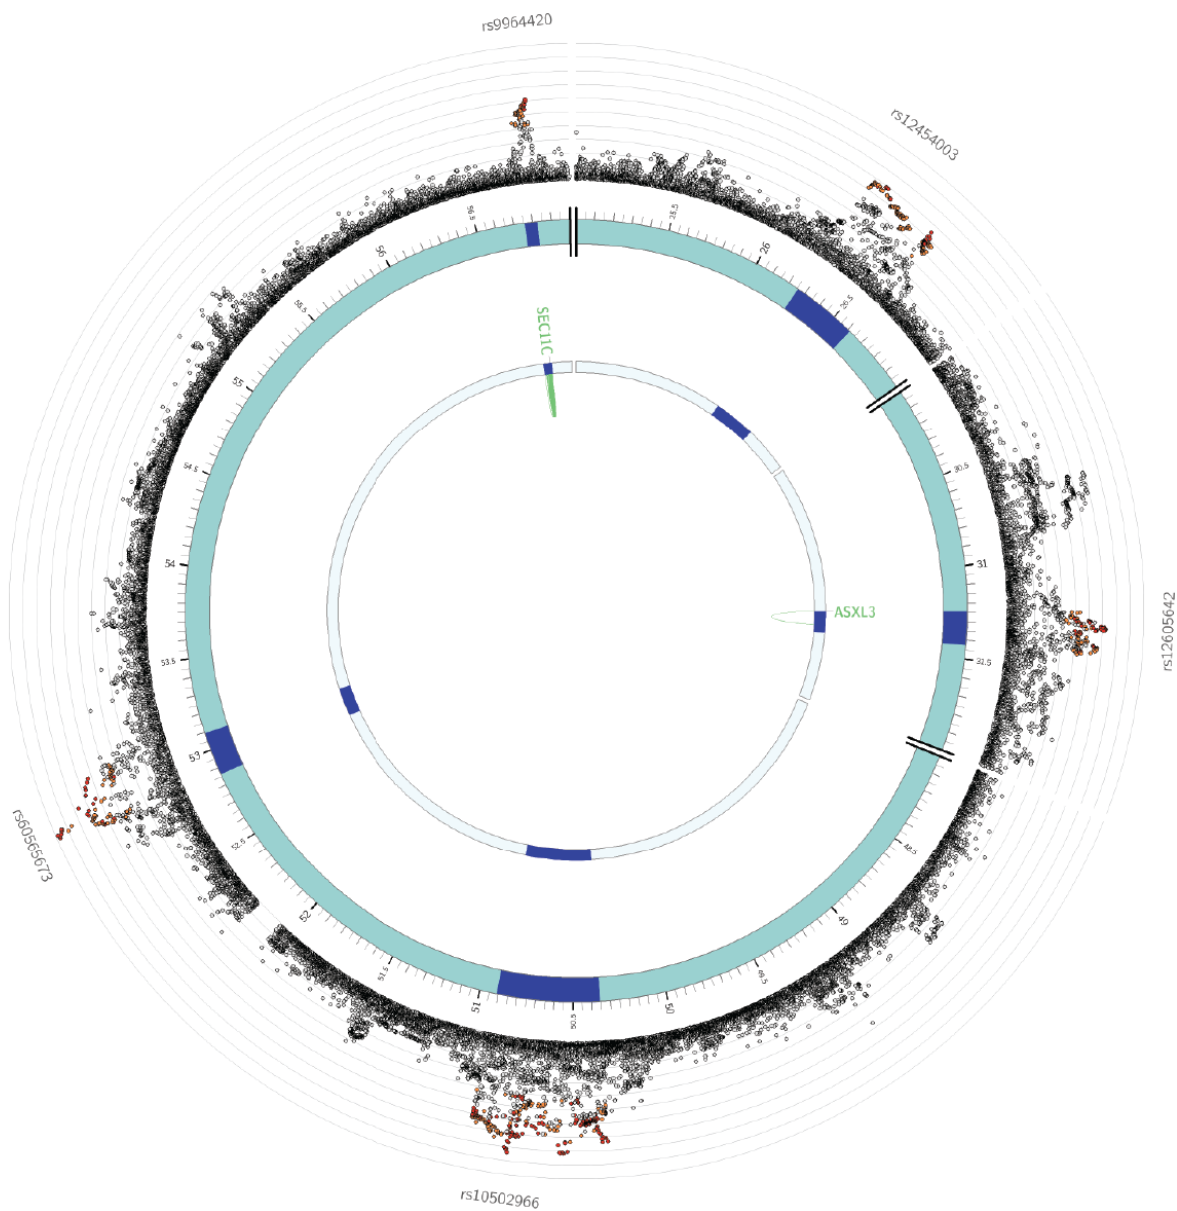



# Chromosome 19

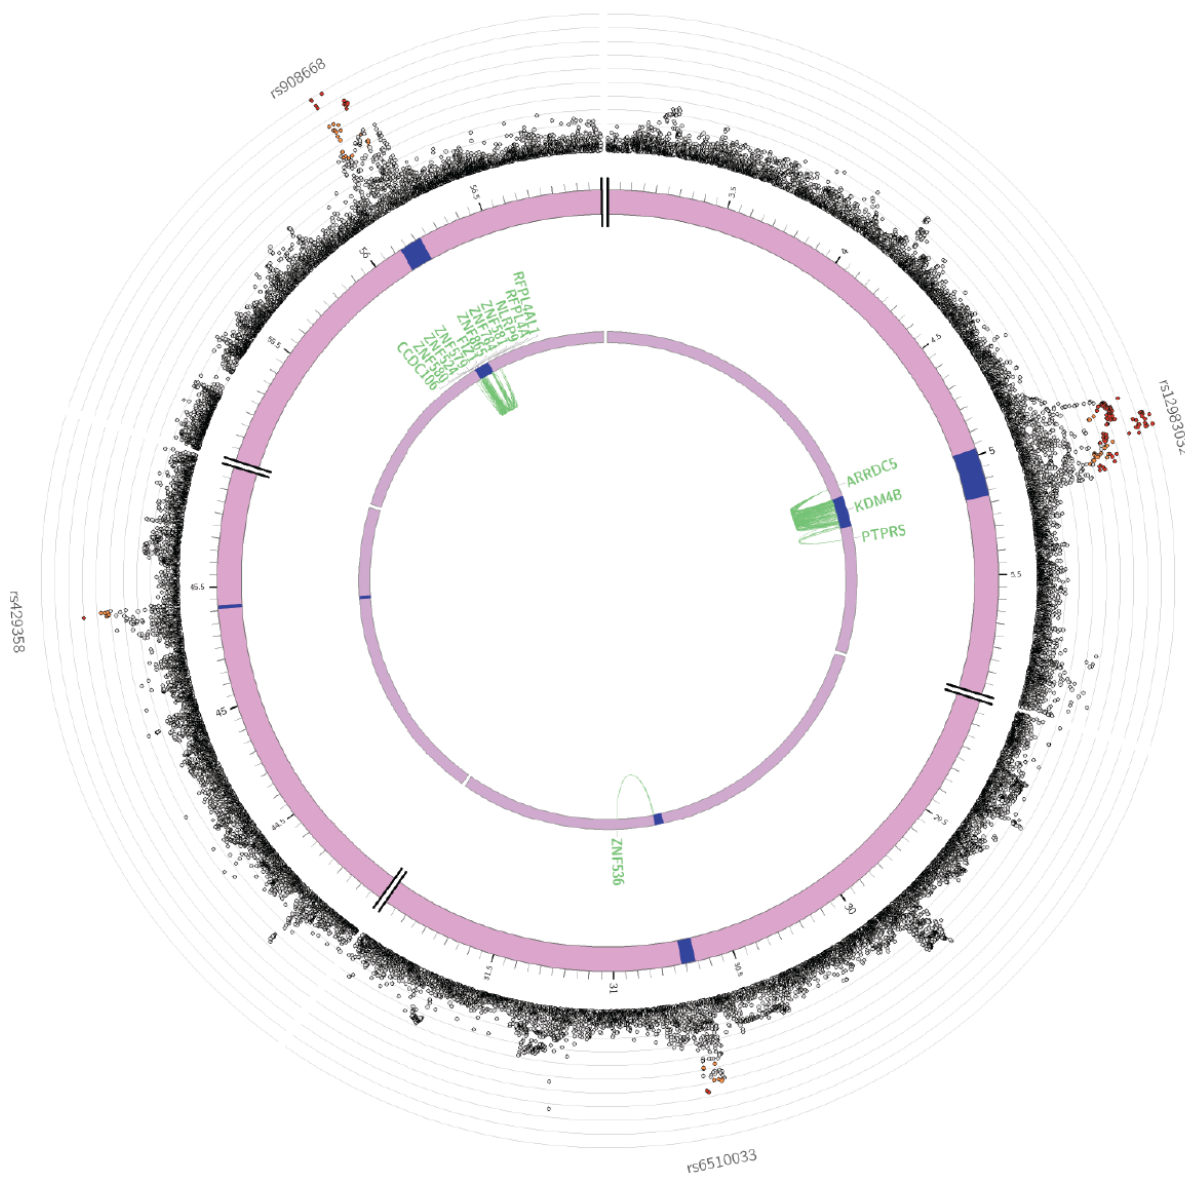

# Chromosome 20

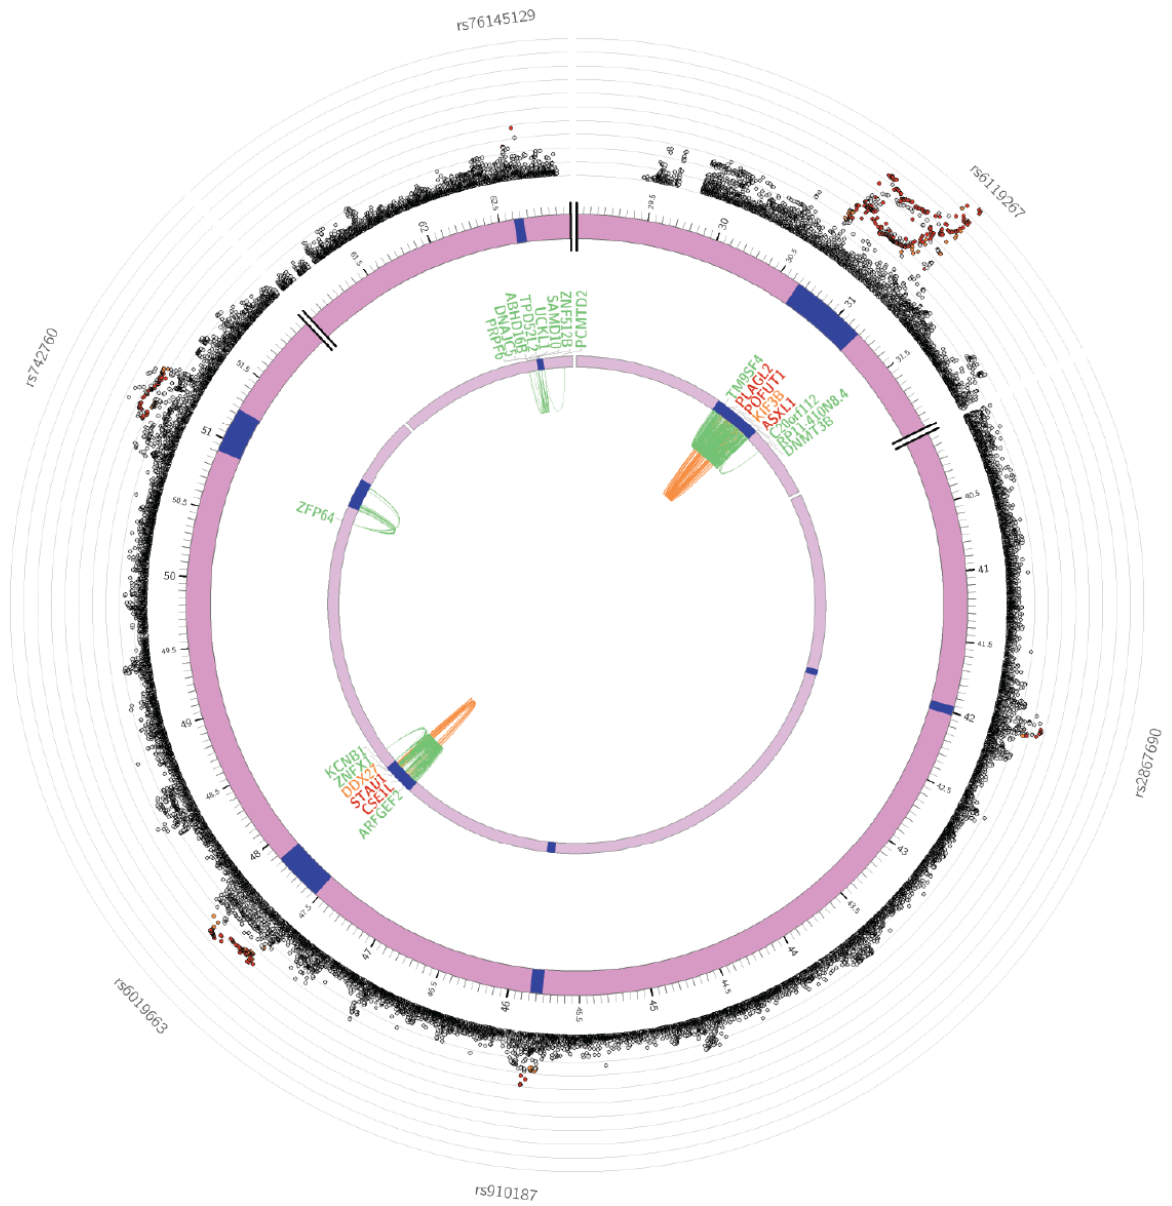



# Chromosome 21

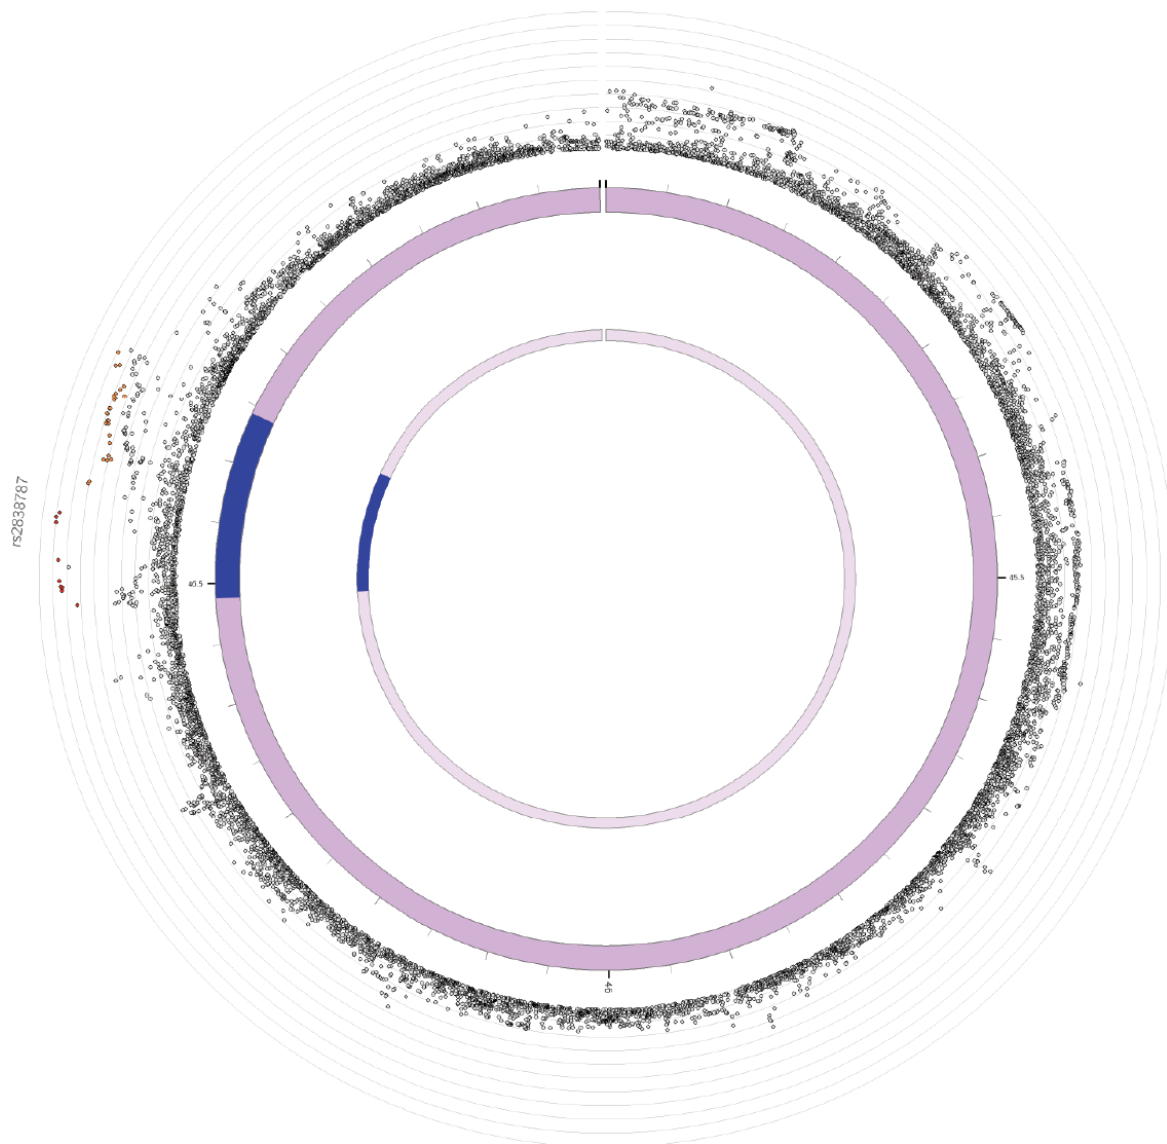

# Chromosome 22

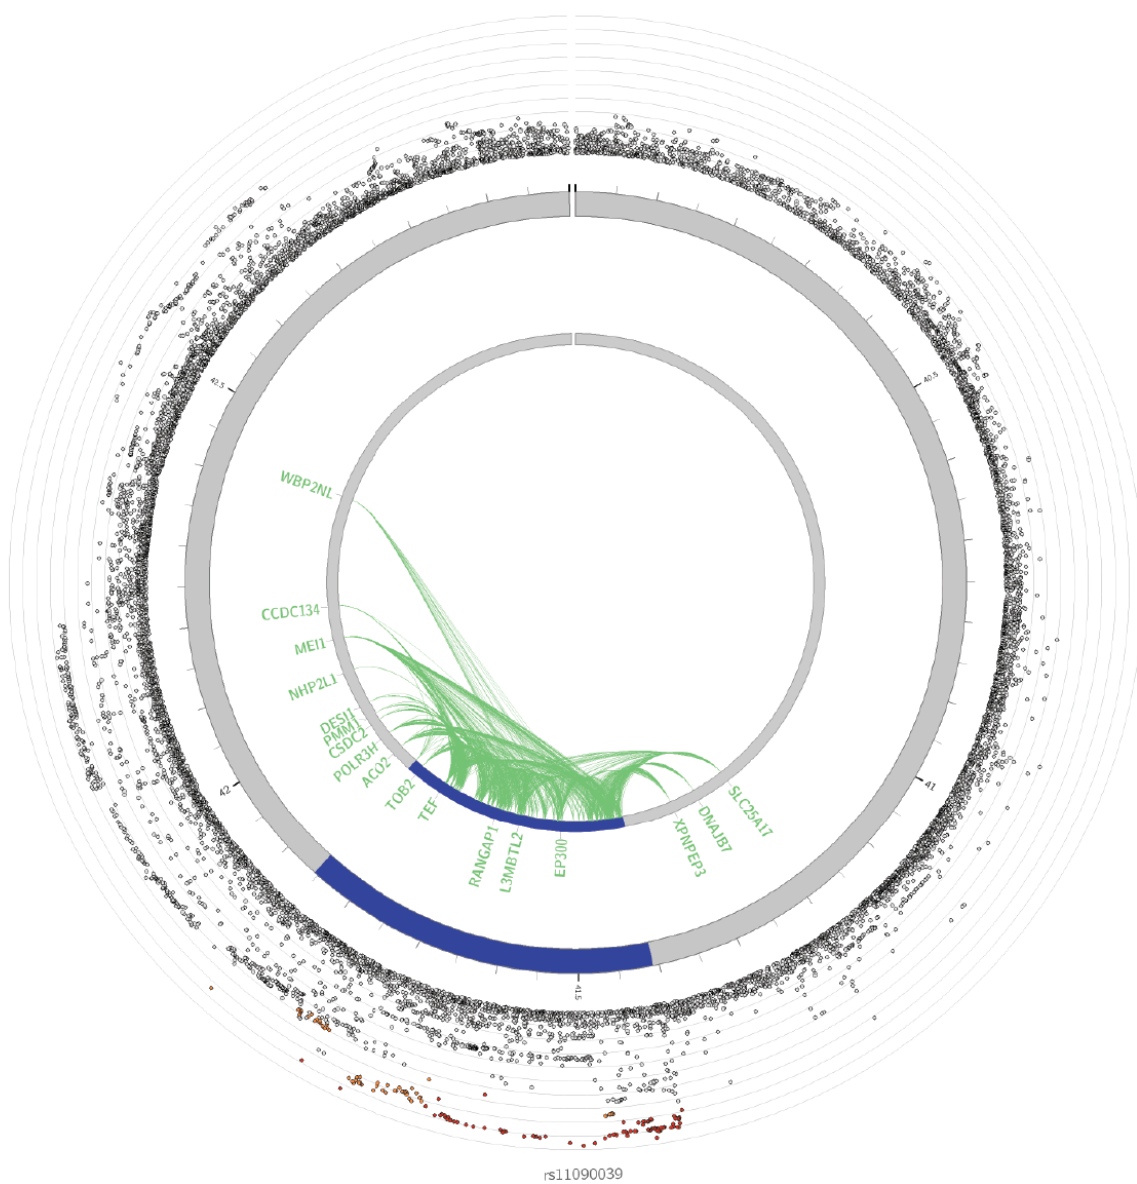

Source: http://biorxiv.org/content/10.1101/214973v1.full.pdf
